# Supplementary material for: How external perturbations affect the chemoselectivity of substrate activation by cytochrome P450 OleTJE
Source: Royal Society of Chemistry journal article supplement (doi:10.1039/d0cp05169a), 2020-01-01
Supplement: d0cp05169a1.pdf [file d0cp05169a1.pdf]

## Electronic Supporting Information

### How external perturbations affect the chemoselectivity of substrate activation by cytochrome P450 OleT<sub>JE</sub>

Ahmed Shahria Chowdhury <sup>ab</sup>, Hafiz Saqib Ali <sup>ac</sup>, Abayomi S. Faponle <sup>d</sup>, and Sam P. de Visser<sup>\*ab</sup>

<sup>a</sup>The Manchester Institute of Biotechnology, The University of Manchester, 131 Princess Street, Manchester M1 7DN, United Kingdom.

<sup>b</sup>Department of Chemical Engineering and Analytical Science, The University of Manchester, Oxford Road, Manchester, M13 9PL, United Kingdom.

<sup>c</sup>Department of Chemistry, The University of Manchester, Oxford Road, Manchester, M13 9PL, United Kingdom.

<sup>d</sup>Department of Biochemistry, Faculty of Basic Medical Sciences, Olabisi Onabanjo University, Sagamu Campus, Ogun State, Nigeria.

Email: [sam.devisser@manchester.ac.uk](mailto:sam.devisser@manchester.ac.uk)

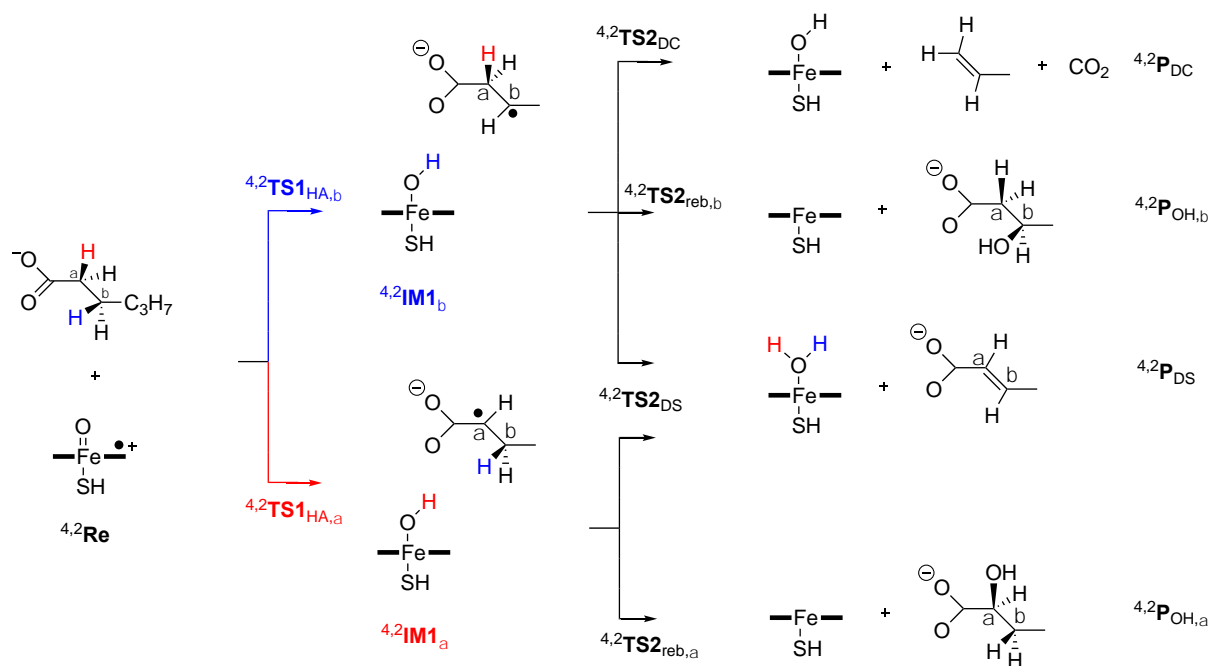

**Scheme S1: Reaction mechanism with definition of labels for substrate activation by P450 CpdI leading to various products.**

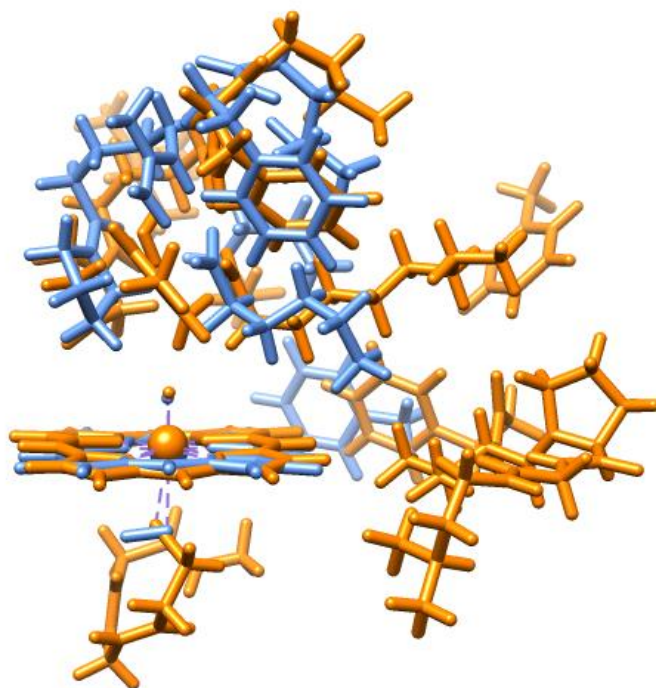

**Fig. S1: Overlay of the optimized geometries of  ${}^2\text{Re}_A$  (in blue) and  ${}^2\text{Re}_B$  (in amber).**

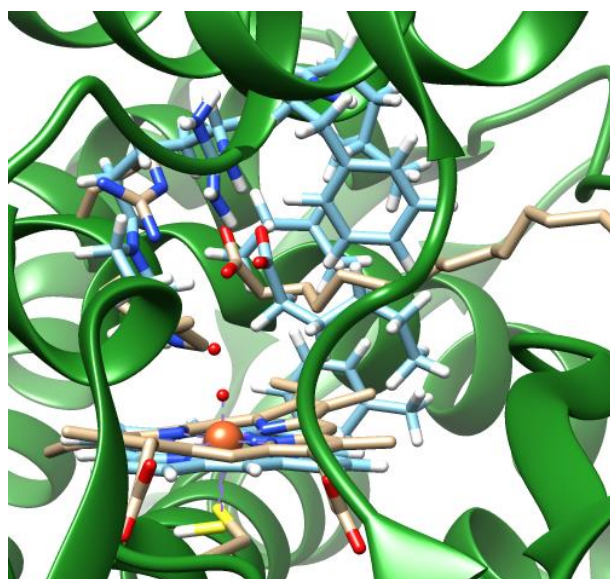

**Fig. S2: Overlay of the optimized geometry of  ${}^2\text{Re}_A$  (with light blue carbon atoms) with the crystal structure coordinates (4L40 pdb, green chains and grey carbon atoms).**

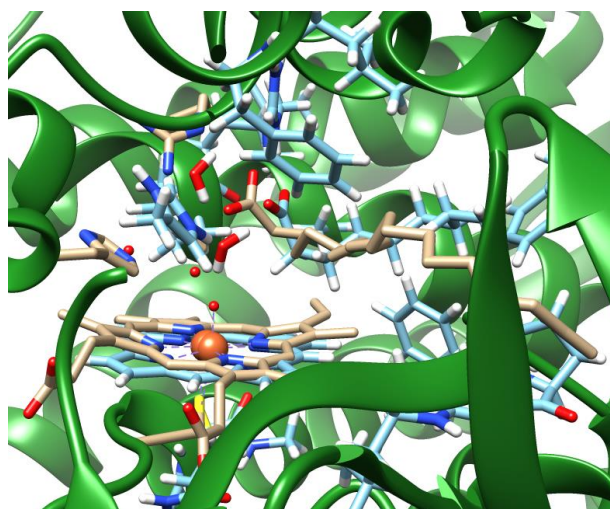

Fig. S3: Overlay of the optimized geometry of  ${}^2\text{Re}_B$  (with light blue carbon atoms) with the crystal structure coordinates (4L40 pdb, green chains and grey carbon atoms).

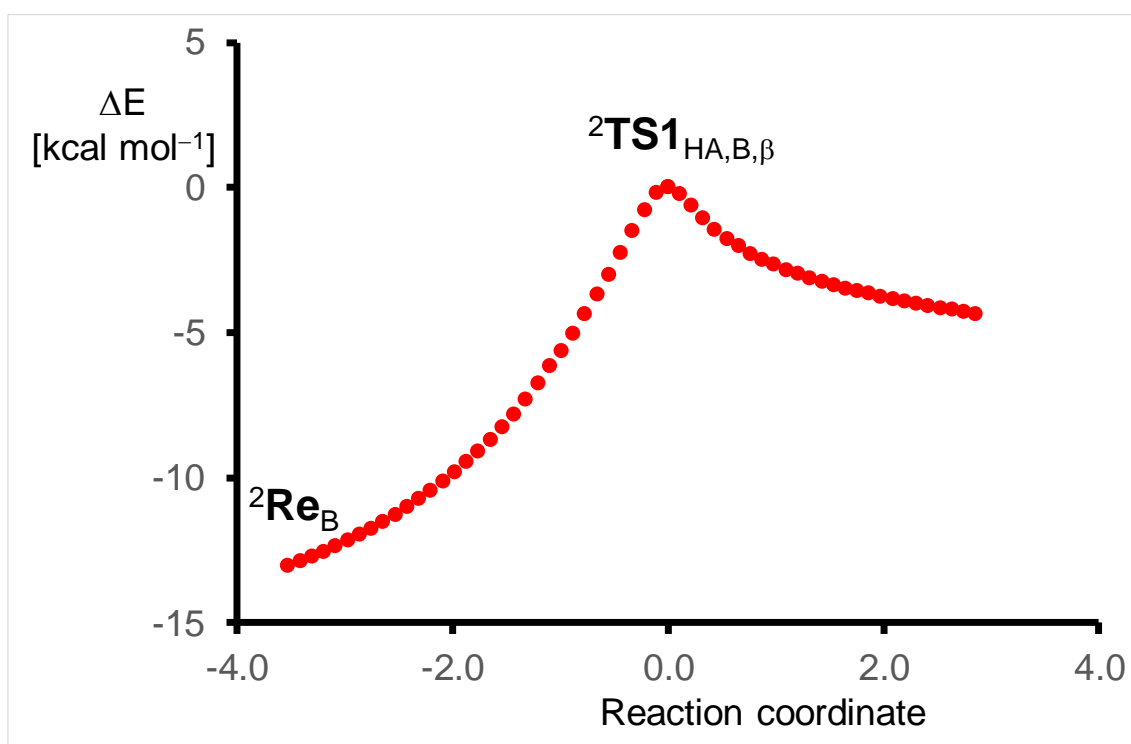

Fig. S4: UB3LYP/BSG1 calculated intrinsic reaction coordinate scan from  ${}^2\text{TS1}_{\text{HA,B},\beta}$  in the direction of reactants and products. As can be seen, the scan falls back  ${}^2\text{Re}_B$  in one direction. Energies are relative to the transition state structure.

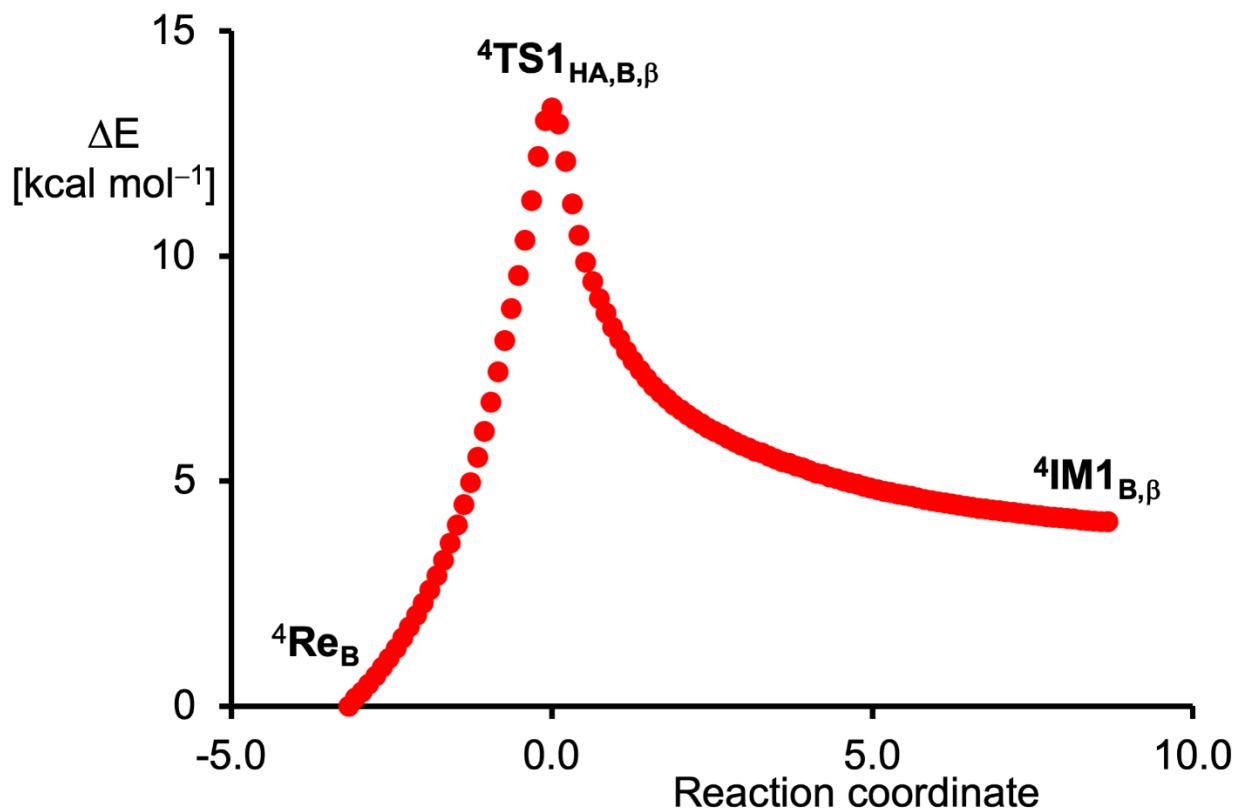

Fig. S5: UB3LYP/BSG1 calculated intrinsic reaction coordinate scan from  ${}^4\text{TS1}_{\text{HA,B},\beta}$  in the direction of reactants and products. As can be seen, the scan falls back  ${}^4\text{Re}_B$  in one direction. Energies are relative to the transition state structure.

**Model A data:****Table S1: Absolute (free) energies (in au) of optimized geometries of local minima and transition states for the pathway of substrate activation by  $^{2,4}\text{Re}_A$  as calculated in Gaussian-09.**

| Structure                               | E [BSG1, au] | ZPE [au] | G [au]       | E [BSG2, au] |
|-----------------------------------------|--------------|----------|--------------|--------------|
| $^2\text{Re}_A$                         | -3765.657348 | 1.371386 | -3764.424599 | -3766.600343 |
| $^4\text{Re}_A$                         | -3765.657291 | 1.371421 | -3764.425384 | -3766.600171 |
| $^2\text{TS1}_{\text{HA,A},\alpha}$     | -3765.632924 | 1.366115 | -3764.409439 | -3766.578722 |
| $^2\text{IM1}_{\text{A},\alpha}$        | -3765.649347 | 1.369673 | -3764.423993 | -3766.599322 |
| $^4\text{TS1}_{\text{HA,A},\alpha}$     | -3765.630742 | 1.365570 | -3764.406169 | -3766.573767 |
| $^4\text{IM1}_{\text{A},\alpha}$        | -3765.647699 | 1.368373 | -3764.423039 | -3766.590810 |
| $^2\text{TS1}_{\text{HA,A},\beta}$      | -3765.627131 | 1.364774 | -3764.400671 | -3766.563006 |
| $^2\text{IM1}_{\text{A},\beta}$         | -3765.648742 | 1.367759 | -3764.426105 | -3766.591303 |
| $^2\text{IM1}'_{\text{A},\beta}$        | -3765.640601 | 1.367238 | -3764.415450 | -3766.566766 |
| $^4\text{TS1}_{\text{HA,A},\beta}$      | -3765.624701 | 1.364872 | -3764.397397 | -3766.560096 |
| $^4\text{IM1}_{\text{A},\beta}$         | -3765.653842 | 1.369020 | -3764.428662 | -3766.601867 |
| $^2\text{P}_{\text{DC},\text{A}}$       | -3765.687229 | 1.367841 | -3764.462894 | -3766.660498 |
| $^4\text{TS2}_{\text{DC},\text{A}}$     | -3765.627447 | 1.365577 | -3764.397872 | -3766.580140 |
| $^4\text{P}_{\text{DC},\text{A}}$       | -3765.631598 | 1.363429 | -3764.416785 | -3766.602147 |
| $^2\text{P}_{\text{OH},\text{A},\beta}$ | -3765.740006 | 1.373697 | -3764.504858 | -3766.679672 |
| $^4\text{TS2}_{\text{reb,A},\beta}$     | -3765.645349 | 1.367878 | -3764.419207 | -3766.594022 |
| $^4\text{P}_{\text{OH},\text{A},\beta}$ | -3765.743298 | 1.373942 | -3764.514604 | -3766.685640 |
| $^2\text{TS2}_{\text{DS},\text{A}}$     | -3765.648076 | 1.367078 | -3764.417294 | -3766.593016 |
| $^2\text{P}_{\text{DS},\text{A}}$       | -3765.735566 | 1.372113 | -3764.505171 | -3766.677398 |
| $^4\text{TS2}_{\text{DS},\text{A}}$     | -3765.642144 | 1.366380 | -3764.416121 | -3766.590635 |
| $^4\text{P}_{\text{DS},\text{A}}$       | -3765.715214 | 1.369543 | -3764.489519 | -3766.659426 |

**Table S2: Relative (free) energies (in kcal mol<sup>-1</sup>) of optimized geometries of local minima and transition states for the pathway of substrate activation by <sup>2,4</sup>Re<sub>A</sub> as calculated in Gaussian-09.**

| Structure                                            | $\Delta E$ | $\Delta E+ZPE$ | $\Delta G$ | $\Delta E$ | $\Delta E+ZPE$ | $\Delta G$ |
|------------------------------------------------------|------------|----------------|------------|------------|----------------|------------|
|                                                      | [BSG1]     | [BSG1]         | [BSG1]     | [BSG2]     | [BSG2]         | [BSG2]     |
| <sup>2</sup> Re <sub>A</sub>                         | 0.00       | 0.00           | 0.00       | 0.00       | 0.00           | 0.00       |
| <sup>4</sup> Re <sub>A</sub>                         | 0.04       | 0.06           | -0.49      | 0.11       | 0.13           | -0.42      |
| <sup>2</sup> TS1 <sub>HA,A,<math>\alpha</math></sub> | 15.33      | 12.02          | 9.51       | 13.57      | 10.26          | 7.75       |
| <sup>2</sup> IM1 <sub>A,<math>\alpha</math></sub>    | 5.02       | 3.95           | 0.38       | 0.64       | -0.43          | -4.00      |
| <sup>4</sup> TS1 <sub>HA,A,<math>\alpha</math></sub> | 16.70      | 13.05          | 11.57      | 16.68      | 13.03          | 11.55      |
| <sup>4</sup> IM1 <sub>A,<math>\alpha</math></sub>    | 6.06       | 4.16           | 0.98       | 5.98       | 4.09           | 0.91       |
| <sup>2</sup> TS1 <sub>HA,A,<math>\beta</math></sub>  | 18.96      | 14.81          | 15.02      | 23.43      | 19.28          | 19.48      |
| <sup>2</sup> IM1 <sub>A,<math>\beta</math></sub>     | 5.40       | 3.12           | -0.95      | 5.67       | 3.40           | -0.67      |
| <sup>2</sup> IM1' <sub>A,<math>\beta</math></sub>    | 10.51      | 7.91           | 5.74       | 21.07      | 18.47          | 16.30      |
| <sup>4</sup> TS1 <sub>HA,A,<math>\beta</math></sub>  | 20.49      | 16.40          | 17.07      | 25.26      | 21.17          | 21.84      |
| <sup>4</sup> IM1 <sub>A,<math>\beta</math></sub>     | 2.20       | 0.72           | -2.55      | -0.96      | -2.44          | -5.71      |
| <sup>2</sup> P <sub>DC,A</sub>                       | -18.75     | -20.97         | -24.03     | -37.75     | -39.97         | -43.03     |
| <sup>4</sup> TS2 <sub>DC,A</sub>                     | 18.76      | 15.12          | 16.77      | 12.68      | 9.03           | 10.69      |
| <sup>4</sup> P <sub>DC,A</sub>                       | 16.16      | 11.17          | 4.90       | -1.13      | -6.12          | -12.39     |
| <sup>2</sup> P <sub>OH,A,<math>\beta</math></sub>    | -51.87     | -50.42         | -50.36     | -49.78     | -48.33         | -48.27     |
| <sup>4</sup> TS2 <sub>reb,A,<math>\beta</math></sub> | 7.53       | 5.33           | 3.38       | 3.97       | 1.77           | -0.18      |
| <sup>4</sup> P <sub>OH,A,<math>\beta</math></sub>    | -53.93     | -52.33         | -56.48     | -53.52     | -51.92         | -56.07     |
| <sup>2</sup> TS2 <sub>DS,A</sub>                     | 5.82       | 3.12           | 4.58       | 4.60       | 1.89           | 3.36       |
| <sup>2</sup> P <sub>DS,A</sub>                       | -49.08     | -48.63         | -50.56     | -48.35     | -47.90         | -49.83     |
| <sup>4</sup> TS2 <sub>DS,A</sub>                     | 9.54       | 6.40           | 5.32       | 6.09       | 2.95           | 1.87       |
| <sup>4</sup> P <sub>DS,A</sub>                       | -36.31     | -37.47         | -40.74     | -37.07     | -38.23         | -41.50     |

**Table S3: Group spin densities and charges of optimized geometries of local minima and transition states for the pathway of substrate activation by  $^{2,4}\text{Re}_A$  as calculated in Gaussian-09 at B3LYP/BSG1 level of theory.**

**(a) Spin densities**

| Spin                                | Fe   | O     | Por   | SH    | Protein | SubH  | Total |
|-------------------------------------|------|-------|-------|-------|---------|-------|-------|
| $^2\text{Re}_A$                     | 1.21 | 0.87  | -0.52 | -0.57 | 0.00    | 0.00  | 1.00  |
| $^4\text{Re}_A$                     | 1.09 | 0.92  | 0.46  | 0.52  | 0.00    | 0.00  | 3.00  |
| $^2\text{TS1}_{\text{HA,A},\alpha}$ | 1.68 | -0.03 | -0.16 | -0.05 | 0.00    | -0.44 | 1.00  |
| $^2\text{IM1}_{\text{A},\alpha}$    | 1.75 | 0.24  | -0.11 | 0.12  | 0.04    | -1.04 | 1.00  |
| $^4\text{TS1}_{\text{HA,A},\alpha}$ | 1.11 | 0.66  | 0.31  | 0.43  | -0.02   | 0.51  | 3.00  |
| $^4\text{IM1}_{\text{A},\alpha}$    | 1.77 | 0.23  | -0.11 | 0.11  | -0.05   | 1.04  | 3.00  |
| $^2\text{TS1}_{\text{HA,A},\beta}$  | 1.01 | 0.52  | -0.54 | -0.36 | 0.00    | 0.36  | 1.00  |
| $^2\text{IM1}_{\text{A},\beta}$     | 0.89 | 0.14  | 0.45  | 0.31  | -0.01   | -0.77 | 1.00  |
| $^2\text{IM1}'_{\text{A},\beta}$    | 1.01 | 0.08  | -0.53 | -0.36 | 0.03    | 0.76  | 1.00  |
| $^4\text{TS1}_{\text{HA,A},\beta}$  | 0.96 | 0.65  | 0.41  | 0.45  | 0.01    | 0.52  | 3.00  |
| $^4\text{IM1}_{\text{A},\beta}$     | 1.79 | 0.24  | -0.11 | 0.09  | 0.01    | 0.98  | 3.00  |
| $^2\text{P}_{\text{DC,A}}$          | 0.97 | 0.07  | -0.08 | 0.04  | 0.00    | 0.00  | 1.00  |
| $^4\text{TS2}_{\text{DC,A}}$        | 2.83 | 0.11  | 0.05  | 0.00  | 0.00    | 0.01  | 3.00  |
| $^4\text{P}_{\text{DC,A}}$          | 0.92 | 0.11  | 1.82  | 0.15  | 0.00    | 0.00  | 3.00  |
| $^2\text{P}_{\text{OH,A},\beta}$    | 1.21 | 0.00  | -0.13 | -0.08 | 0.00    | 0.00  | 1.00  |
| $^4\text{TS2}_{\text{reb,A},\beta}$ | 2.02 | 0.12  | -0.12 | 0.13  | 0.03    | 0.82  | 3.00  |
| $^4\text{P}_{\text{OH,A},\beta}$    | 2.49 | 0.00  | 0.04  | 0.47  | 0.00    | 0.00  | 3.00  |
| $^2\text{TS2}_{\text{DS,A}}$        | 1.06 | 0.01  | -0.35 | -0.33 | 0.05    | 0.56  | 1.00  |
| $^2\text{P}_{\text{DS,A}}$          | 1.07 | 0.00  | -0.08 | 0.01  | 0.00    | 0.00  | 1.00  |
| $^4\text{TS2}_{\text{DS,A}}$        | 2.32 | 0.04  | -0.11 | 0.10  | 0.07    | 0.58  | 3.00  |
| $^4\text{P}_{\text{DS,A}}$          | 3.09 | 0.01  | 0.05  | -0.15 | 0.00    | 0.00  | 3.00  |

**(b) Charges**

| Charge                              | Fe   | O     | Por   | SH    | Protein | SubH  | Total |
|-------------------------------------|------|-------|-------|-------|---------|-------|-------|
| $^2\text{Re}_A$                     | 0.48 | -0.41 | -0.05 | -0.04 | 0.82    | -0.81 | 0.00  |
| $^4\text{Re}_A$                     | 0.47 | -0.40 | -0.04 | -0.04 | 0.82    | -0.81 | 0.00  |
| $^2\text{TS1}_{\text{HA,A},\alpha}$ | 0.43 | -0.56 | -0.24 | -0.02 | 0.87    | -0.48 | 0.00  |
| $^2\text{IM1}_{\text{A},\alpha}$    | 0.39 | -0.67 | -0.24 | 0.05  | 0.82    | -0.34 | 0.00  |
| $^4\text{TS1}_{\text{HA,A},\alpha}$ | 0.40 | -0.59 | -0.14 | 0.01  | 0.84    | -0.52 | 0.00  |
| $^4\text{IM1}_{\text{A},\alpha}$    | 0.40 | -0.68 | -0.22 | 0.05  | 0.81    | -0.36 | 0.00  |
| $^2\text{TS1}_{\text{HA,A},\beta}$  | 0.37 | -0.58 | -0.11 | -0.05 | 0.84    | -0.46 | 0.00  |
| $^2\text{IM1}_{\text{A},\beta}$     | 0.32 | -0.70 | -0.14 | -0.06 | 0.85    | -0.25 | 0.00  |
| $^2\text{IM1}'_{\text{A},\beta}$    | 0.39 | -0.63 | -0.25 | -0.05 | 0.89    | -0.34 | 0.00  |
| $^4\text{TS1}_{\text{HA,A},\beta}$  | 0.40 | -0.60 | -0.14 | -0.02 | 0.83    | -0.48 | 0.00  |
| $^4\text{IM1}_{\text{A},\beta}$     | 0.41 | -0.68 | -0.23 | 0.04  | 0.81    | -0.35 | 0.00  |
| $^2\text{P}_{\text{DC,A}}$          | 0.28 | -0.73 | -0.62 | -0.18 | 1.06    | 0.20  | 0.00  |
| $^4\text{TS2}_{\text{DC,A}}$        | 0.41 | -0.77 | -0.69 | -0.20 | 1.02    | 0.24  | 0.00  |
| $^4\text{P}_{\text{DC,A}}$          | 0.29 | -0.73 | -0.70 | -0.14 | 1.06    | 0.22  | 0.00  |
| $^2\text{P}_{\text{OH,A},\beta}$    | 0.27 | -0.64 | -0.36 | 0.01  | 0.82    | -0.12 | 0.00  |
| $^4\text{TS2}_{\text{reb,A},\beta}$ | 0.42 | -0.68 | -0.28 | -0.03 | 0.85    | -0.28 | 0.00  |
| $^4\text{P}_{\text{OH,A},\beta}$    | 0.45 | -0.64 | -0.37 | -0.15 | 0.83    | -0.11 | 0.00  |
| $^2\text{TS2}_{\text{DS,A}}$        | 0.34 | -0.71 | -0.26 | -0.08 | 0.92    | -0.22 | 0.00  |
| $^2\text{P}_{\text{DS,A}}$          | 0.23 | -0.73 | -0.44 | 0.01  | 1.10    | -0.16 | 0.00  |
| $^4\text{TS2}_{\text{DS,A}}$        | 0.45 | -0.71 | -0.32 | -0.09 | 0.93    | -0.27 | 0.00  |
| $^4\text{P}_{\text{DS,A}}$          | 0.44 | -0.74 | -0.59 | -0.03 | 1.08    | -0.17 | 0.00  |



## Model B data:

**Table S4:** Absolute (free) energies (au) of optimized geometries for substrate activation by  $^{4,2}\text{Re}_B$  as calculated at the UB3LYP level of theory in the quartet spin state. Uncorrected vibrational energies and entropies.

|                                      | $E_{\text{BSG1}}$ | $E_{\text{BSG1+ZPE}}$ | $G_{\text{BSG1}}$ | $E_{\text{BSG2}}$ | $E_{\text{BSG2+ZPE}}$ | $G_{\text{BSG2}}$ | $E_{\text{Disp}}$ | $E_{\text{Disp+ZPE}}$ | $G_{\text{Disp}}$ |
|--------------------------------------|-------------------|-----------------------|-------------------|-------------------|-----------------------|-------------------|-------------------|-----------------------|-------------------|
| $^4\text{Re}_B$                      | -6657.56226       | -6654.94439           | -6655.19763       | -6660.83135       | -6658.21347           | -6658.46672       | -6661.24313       | -6658.62830           | -6658.71265       |
| $^4\text{TS1}_{\text{HA,B},\alpha}$  | -6657.54574       | -6654.93431           | -6655.19422       | -6660.80133       | -6658.18990           | -6658.44981       | -6661.21103       | -6658.60262           | -6658.68369       |
| $^4\text{TS1}_{\text{HA,B},\beta}$   | -6657.54247       | -6654.93199           | -6655.18737       | -6660.79413       | -6658.18365           | -6658.43904       | -6661.21855       | -6658.61102           | -6658.69420       |
| $^4\text{IM1}_{\text{B},\alpha}$     | -6657.56843       | -6654.95332           | -6655.21095       | -6660.82771       | -6658.21260           | -6658.47023       | -6661.23448       | -6658.62249           | -6658.70428       |
| $^4\text{IM1}_{\text{B},\beta}$      | -6657.55910       | -6654.94498           | -6655.20103       | -6660.81719       | -6658.20307           | -6658.45913       | -6661.23827       | -6658.62723           | -6658.71183       |
| $^4\text{TS2}_{\text{reb,B},\alpha}$ | -6657.55860       | -6654.94138           | -6655.19478       | -6660.82365       | -6658.20643           | -6658.45983       | -6661.23869       | -6658.62450           | -6658.70976       |
| $^4\text{TS2}_{\text{DS,B},\beta}$   | -6657.54913       | -6654.93718           | -6655.18811       | -6660.80739       | -6658.19543           | -6658.44637       | -6661.22929       | -6658.62010           | -6658.71145       |
| $^4\text{TS2}_{\text{DC,B}}$         | -6657.51711       | -6654.90634           | -6655.15661       | -6660.78080       | -6658.17003           | -6658.42030       | -6661.22929       | -6658.62148           | -6658.70655       |
| $^4\text{P}_{\text{OH,B},\alpha}$    | -6657.61571       | -6654.99456           | -6655.24444       | -6660.88148       | -6658.26034           | -6658.51022       | -6661.29266       | -6658.67458           | -6658.75988       |
| $^4\text{P}_{\text{OH,B},\beta}$     | -6657.64954       | -6655.02625           | -6655.27912       | -6660.90861       | -6658.28531           | -6658.53818       | -6661.33182       | -6658.71170           | -6658.79424       |
| $^4\text{P}_{\text{DS,B}}$           | -6657.64091       | -6655.02165           | -6655.27339       | -6660.89960       | -6658.28034           | -6658.53208       | -6661.31379       | -6658.69750           | -6658.78805       |
| $^4\text{P}_{\text{DC,B}}$           | -6657.58879       | -6654.97722           | -6655.25324       | -6660.88705       | -6658.27548           | -6658.55150       | -6658.27548       | -6658.55150           | -6661.30435       |
| $^2\text{Re}_B$                      | -6657.56260       | -6654.94476           | -6655.19717       | -6660.83182       | -6658.21397           | -6658.46638       | -6661.24358       | -6658.62867           | -6658.71477       |
| $^2\text{TS1}_{\text{HA,B},\alpha}$  | -6657.54761       | -6654.93580           | -6655.19256       | -6660.80335       | -6658.19154           | -6658.44830       | -6661.21353       | -6658.60482           | -6658.68494       |
| $^2\text{TS1}_{\text{HA,B},\beta}$   | -6657.54441       | -6654.93382           | -6655.18823       | -6660.79617       | -6658.18558           | -6658.43999       | -6661.22058       | -6658.61294           | -6658.69542       |
| $^2\text{IM1}_{\text{B},\alpha}$     | -6657.56884       | -6654.95384           | -6655.21127       | -6660.82796       | -6658.21297           | -6658.47039       | -6661.23490       | -6658.62301           | -6658.70427       |
| $^2\text{IM1}_{\text{B},\beta}$      | -6657.55989       | -6654.94583           | -6655.20084       | -6660.81813       | -6658.20407           | -6658.45909       | -6661.23957       | -6658.62861           | -6658.71241       |

**Table S5:** Relative (free) energies ( $\text{kcal mol}^{-1}$ ) of optimized geometries for substrate activation by  $^{4,2}\text{Re}_B$  as calculated at the UB3LYP level of theory in the quartet spin state. Uncorrected vibrational energies and enthalpies.

|                                      | $\Delta E_{\text{BSG1}}$ | $\Delta E_{\text{BSG1+ZPE}}$ | $\Delta G_{\text{BSG1}}$ | $\Delta E_{\text{BSG2}}$ | $\Delta E_{\text{BSG2+ZPE}}$ | $\Delta G_{\text{BSG2}}$ | $E_{\text{Disp}}$ | $E_{\text{Disp+ZPE}}$ | $G_{\text{Disp}}$ |
|--------------------------------------|--------------------------|------------------------------|--------------------------|--------------------------|------------------------------|--------------------------|-------------------|-----------------------|-------------------|
| $^4\text{Re}_B$                      | 0.21                     | 0.23                         | -0.29                    | 0.29                     | 0.31                         | -0.21                    | 0.28              | 0.24                  | 1.33              |
| $^4\text{TS1}_{\text{HA,B},\alpha}$  | 10.58                    | 6.56                         | 1.85                     | 19.13                    | 15.11                        | 10.40                    | 20.43             | 16.35                 | 19.50             |
| $^4\text{TS1}_{\text{HA,B},\beta}$   | 12.63                    | 8.01                         | 6.15                     | 23.65                    | 19.03                        | 17.16                    | 15.71             | 11.08                 | 12.91             |
| $^4\text{IM1}_{\text{B},\alpha}$     | -3.66                    | -5.37                        | -8.65                    | 2.58                     | 0.86                         | -2.41                    | 5.71              | 3.88                  | 6.58              |
| $^4\text{IM1}_{\text{B},\beta}$      | 2.20                     | -0.14                        | -2.43                    | 9.18                     | 6.84                         | 4.55                     | 3.33              | 0.90                  | 1.84              |
| $^4\text{TS2}_{\text{reb,B},\alpha}$ | 2.51                     | 2.12                         | 1.50                     | 5.12                     | 4.73                         | 4.11                     | 3.07              | 2.62                  | 3.14              |
| $^4\text{TS2}_{\text{DS,B},\beta}$   | 8.45                     | 4.76                         | 5.68                     | 15.33                    | 11.63                        | 12.56                    | 8.97              | 5.38                  | 2.08              |
| $^4\text{TS2}_{\text{DC,B}}$         | 28.54                    | 24.11                        | 25.45                    | 32.01                    | 27.58                        | 28.92                    | 8.97              | 4.51                  | 5.16              |
| $^4\text{P}_{\text{OH,B},\alpha}$    | -33.33                   | -31.25                       | -29.67                   | -31.17                   | -29.09                       | -27.51                   | -30.80            | -28.80                | -28.31            |
| $^4\text{P}_{\text{OH,B},\beta}$     | -54.56                   | -51.14                       | -51.43                   | -48.19                   | -44.77                       | -45.06                   | -55.37            | -52.10                | -49.87            |
| $^4\text{P}_{\text{DS,B}}$           | -49.14                   | -48.25                       | -47.83                   | -42.53                   | -41.64                       | -41.23                   | -44.06            | -43.19                | -45.99            |
| $^4\text{P}_{\text{DC,B}}$           | -16.43                   | -20.37                       | -35.19                   | -34.66                   | -38.60                       | -53.41                   | -38.14            | -42.07                | -56.89            |
| $^2\text{Re}_B$                      | 0.00                     | 0.00                         | 0.00                     | 0.00                     | 0.00                         | 0.00                     | 0.00              | 0.00                  | 0.00              |
| $^2\text{TS1}_{\text{HA,B},\alpha}$  | 9.41                     | 5.62                         | 2.89                     | 17.87                    | 14.08                        | 11.35                    | 18.86             | 14.97                 | 18.72             |
| $^2\text{TS1}_{\text{HA,B},\beta}$   | 11.41                    | 6.86                         | 5.61                     | 22.37                    | 17.82                        | 16.56                    | 14.43             | 9.87                  | 12.14             |
| $^2\text{IM1}_{\text{B},\alpha}$     | -3.91                    | -5.70                        | -8.85                    | 2.42                     | 0.63                         | -2.52                    | 5.45              | 3.55                  | 6.59              |
| $^2\text{IM1}_{\text{B},\beta}$      | 1.70                     | -0.67                        | -2.31                    | 8.59                     | 6.21                         | 4.58                     | 2.52              | 0.04                  | 1.48              |

**Table S6:** Group spin densities of optimized geometries for substrate activation by  $^4\text{Re}_B$  as calculated at the UB3LYP/BSG1 level of theory in the quartet spin state.

| System                               | Fe   | O     | Porphyrin | Substrate | Amino Acids | Total |
|--------------------------------------|------|-------|-----------|-----------|-------------|-------|
| $^4\text{Re}_B$                      | 1.20 | 0.82  | 0.33      | 0.00      | 0.65        | 3.00  |
| $^4\text{TS1}_{\text{HA,B},\alpha}$  | 1.01 | 0.56  | 0.47      | 0.46      | 0.50        | 3.00  |
| $^4\text{TS1}_{\text{HA,B},\beta}$   | 0.98 | 0.53  | 0.43      | 0.51      | 0.55        | 3.00  |
| $^4\text{IM1}_{\text{B},\alpha}$     | 0.98 | 0.08  | 0.51      | 0.99      | 0.44        | 3.00  |
| $^4\text{IM1}_{\text{B},\beta}$      | 0.98 | 0.08  | 0.49      | 0.98      | 0.47        | 3.00  |
| $^4\text{TS2}_{\text{reb,B},\alpha}$ | 2.33 | -0.02 | -0.09     | 0.76      | 0.03        | 3.00  |
| $^4\text{TS2}_{\text{DS,B},\beta}$   | 2.53 | -0.06 | -0.09     | 0.55      | 0.07        | 3.00  |
| $^4\text{TS2}_{\text{DC,B}}$         | 0.98 | 0.07  | 0.50      | 0.95      | 0.49        | 3.00  |
| $^4\text{P}_{\text{OH,B},\alpha}$    | 2.50 | 0.00  | 0.04      | -0.00     | 0.46        | 3.00  |
| $^4\text{P}_{\text{OH,B},\beta}$     | 2.52 | 0.00  | 0.05      | -0.00     | 0.44        | 3.00  |
| $^4\text{P}_{\text{DS,B}}$           | 2.51 | 0.00  | 0.05      | -0.00     | 0.44        | 3.00  |
| $^4\text{P}_{\text{DC,B}}$           | 2.64 | 0.00  | -0.05     | 0.00      | 0.42        | 3.00  |

**Table S7:** Group charges of optimized geometries for substrate activation by  $^4\text{Re}_B$  as calculated at the UB3LYP/BSG1 level of theory in the quartet spin state.

| System                               | Fe   | O     | Porphyrin | Substrate | Amino Acids | Total |
|--------------------------------------|------|-------|-----------|-----------|-------------|-------|
| $^4\text{Re}_B$                      | 0.52 | -0.45 | -0.17     | -0.62     | 1.67        | 1.00  |
| $^4\text{TS1}_{\text{HA,B},\alpha}$  | 0.48 | -0.62 | -0.13     | -0.37     | 1.64        | 1.00  |
| $^4\text{TS1}_{\text{HA,B},\beta}$   | 0.48 | -0.63 | -0.18     | -0.32     | 1.65        | 1.00  |
| $^4\text{IM1}_{\text{B},\alpha}$     | 0.43 | -0.73 | -0.12     | -0.21     | 1.64        | 1.00  |
| $^4\text{IM1}_{\text{B},\beta}$      | 0.41 | -0.73 | -0.13     | -0.22     | 1.67        | 1.00  |
| $^4\text{TS2}_{\text{reb,B},\alpha}$ | 0.43 | -0.67 | -0.33     | -0.09     | 1.66        | 1.00  |
| $^4\text{TS2}_{\text{DS,B},\beta}$   | 0.48 | -0.68 | -0.37     | -0.02     | 1.59        | 1.00  |
| $^4\text{TS2}_{\text{DC,B}}$         | 0.44 | -0.73 | -0.12     | -0.26     | 1.68        | 1.00  |
| $^4\text{P}_{\text{OH,B},\alpha}$    | 0.60 | -0.68 | -0.41     | 0.12      | 1.38        | 1.00  |
| $^4\text{P}_{\text{OH,B},\beta}$     | 0.52 | -0.70 | -0.43     | 0.17      | 1.44        | 1.00  |
| $^4\text{P}_{\text{DS,B}}$           | 0.55 | -0.79 | -0.43     | 0.24      | 1.43        | 1.00  |
| $^4\text{P}_{\text{DC,B}}$           | 0.40 | -0.74 | -0.12     | -0.25     | 1.71        | 1.00  |

**Table S8:** Group spin densities of optimized geometries for substrate activation by  $^4\text{Re}_B$  as calculated at the UB3LYP/BSG1 level of theory in the doublet spin state.

| System                              | Fe   | O    | Porphyrin | Substrate | Amino Acids | Total |
|-------------------------------------|------|------|-----------|-----------|-------------|-------|
| $^2\text{Re}_B$                     | 1.32 | 0.80 | -0.42     | 0.00      | -0.70       | 1.00  |
| $^2\text{TS1}_{\text{HA,B},\alpha}$ | 1.10 | 0.53 | -0.55     | 0.44      | -0.52       | 1.00  |
| $^2\text{TS1}_{\text{HA,B},\beta}$  | 1.08 | 0.49 | -0.50     | 0.49      | -0.57       | 1.00  |
| $^2\text{IM1}_{\text{B},\alpha}$    | 1.07 | 0.06 | -0.60     | 0.99      | -0.51       | 1.00  |
| $^2\text{IM1}_{\text{B},\beta}$     | 1.08 | 0.05 | -0.57     | 0.94      | -0.49       | 1.00  |

**Table S9:** Group charges of optimized geometries for substrate activation by  $^4\text{Re}_B$  as calculated at the UB3LYP/BSG1 level of theory in the doublet spin state.

| System                              | Fe   | O     | Porphyrin | Substrate | Amino Acids | Total |
|-------------------------------------|------|-------|-----------|-----------|-------------|-------|
| $^2\text{Re}_B$                     | 0.52 | -0.46 | -0.11     | -0.62     | 1.67        | 1.00  |
| $^2\text{TS1}_{\text{HA,B},\alpha}$ | 0.46 | -0.62 | -0.13     | -0.37     | 1.65        | 1.00  |
| $^2\text{TS1}_{\text{HA,B},\beta}$  | 0.47 | -0.63 | -0.18     | -0.31     | 1.65        | 1.00  |
| $^2\text{IM1}_{\text{B},\alpha}$    | 0.43 | -0.73 | -0.12     | -0.21     | 1.64        | 1.00  |
| $^2\text{IM1}_{\text{B},\beta}$     | 0.41 | -0.73 | -0.14     | -0.19     | 1.66        | 1.00  |

## Cartesian Coordinates of model B optimized structures.

|                  |             |             |              |   |             |             |             |
|------------------|-------------|-------------|--------------|---|-------------|-------------|-------------|
| <sup>4</sup> ReB |             |             |              | H | 3.82318100  | 2.66836600  | -9.54725600 |
| C                | 5.72507800  | 7.49505500  | 1.97845600   | H | 2.98545500  | 0.84214500  | -8.10054400 |
| C                | 6.25997500  | 6.36904700  | 1.04659200   | H | 4.58653000  | -0.70183400 | -6.97084900 |
| C                | 5.47734900  | 6.14806900  | -0.27117500  | H | 7.03631500  | -0.38489700 | -7.31300600 |
| C                | 5.56872200  | 7.36447600  | -1.21302800  | H | 7.86861200  | 1.44386900  | -8.76098000 |
| C                | 5.99871200  | 4.87871800  | -0.97510300  | C | -3.79350500 | 9.19927300  | -2.25225300 |
| C                | 4.38956200  | 7.15115200  | 2.60278300   | C | -2.29093700 | 9.28151300  | -1.87484700 |
| O                | 3.29086400  | 7.33497200  | 1.99549400   | C | -1.35328700 | 8.73463100  | -2.96895200 |
| H                | 5.60492700  | 8.42475200  | 1.41512200   | C | 0.09157600  | 8.56195300  | -2.47383200 |
| H                | 7.30295400  | 6.61195100  | 0.79927600   | N | 0.18709400  | 7.43975400  | -1.52464100 |
| H                | 6.28174400  | 5.42692300  | 1.61168300   | C | 1.02669400  | 7.36682000  | -0.48771700 |
| H                | 4.41963800  | 5.98399100  | -0.02107700  | N | 1.90944800  | 8.34875600  | -0.19814900 |
| H                | 5.02455700  | 7.17137400  | -2.14444100  | N | 0.99514200  | 6.28173100  | 0.32834100  |
| H                | 5.14203100  | 8.26952400  | -0.76565300  | C | -4.22172700 | 7.75407700  | -2.44757000 |
| H                | 6.61346800  | 7.57667100  | -1.47549400  | O | -4.17393200 | 7.21784700  | -3.58827800 |
| H                | 5.44595800  | 4.69050600  | -1.90250100  | H | -3.96658700 | 9.71927500  | -3.19852700 |
| H                | 5.88862000  | 3.99737400  | -0.33275400  | H | -2.12050400 | 8.72408000  | -0.94354900 |
| H                | 7.06050200  | 4.98196600  | -1.23488400  | H | -2.03675000 | 10.33047200 | -1.66664200 |
| N                | 4.42279400  | 6.60285300  | 3.84435400   | H | -1.72378600 | 7.77549900  | -3.34894800 |
| C                | 3.22846800  | 6.15696200  | 4.56742200   | H | -1.34334500 | 9.42317100  | -3.82351600 |
| C                | 3.21804500  | 4.63362900  | 4.83031200   | H | 0.76365200  | 8.38610400  | -3.32442700 |
| C                | 3.29349400  | 3.78655200  | 3.57323500   | H | 0.41252700  | 9.48846200  | -1.97991700 |
| C                | 2.23919300  | 3.77330500  | 2.64096000   | H | -0.34731100 | 6.56882500  | -1.75327900 |
| C                | 2.32651700  | 3.01083400  | 1.46992100   | H | 2.00590300  | 9.15434800  | -0.79033600 |
| C                | 3.47158100  | 2.24241100  | 1.21856600   | H | 2.54401900  | 8.22118500  | 0.59147800  |
| C                | 4.52259000  | 2.23923200  | 2.14191100   | H | 0.44802900  | 5.43271600  | 0.08322700  |
| C                | 4.43259400  | 3.00900100  | 3.30887900   | H | 1.72062900  | 6.20810600  | 1.03317300  |
| H                | 5.32231200  | 6.46834100  | 4.28492500   | N | -4.56368100 | 7.03286000  | -1.34278800 |
| H                | 2.37347900  | 6.45093200  | 3.95553500   | C | -4.79602300 | 5.57034800  | -1.44594000 |
| H                | 4.05269000  | 4.37639300  | 5.49625500   | C | -5.25292100 | 5.16241800  | -0.03127300 |
| H                | 2.29831400  | 4.40968300  | 5.39052100   | C | -4.67568200 | 6.25741000  | 0.89577100  |
| H                | 1.34022900  | 4.35897500  | 2.82211400   | C | -4.73495600 | 7.53618500  | 0.03858300  |
| H                | 1.50605100  | 3.02598800  | 0.75849100   | H | -3.86121900 | 5.08567300  | -1.75025600 |
| H                | 3.54202700  | 1.65143500  | 0.31118900   | H | -6.34765300 | 5.16475800  | 0.02397600  |
| H                | 5.40890300  | 1.64031800  | 1.95733500   | H | -4.90997500 | 4.15818500  | 0.23343200  |
| H                | 5.25143000  | 3.00035000  | 4.02386800   | H | -5.24203300 | 6.36397800  | 1.82647400  |
| C                | 0.02924100  | 1.62925700  | 7.42290100   | H | -3.63776200 | 6.03516300  | 1.16730700  |
| C                | -0.46861000 | 2.16649100  | 6.11997500   | H | -3.95110900 | 8.24996600  | 0.30469600  |
| N                | -0.73227900 | 3.53143700  | 5.91829700   | H | -5.70577100 | 8.04212200  | 0.14665700  |
| C                | -1.14537400 | 3.74536000  | 4.64450400   | C | -2.77689100 | 5.55136100  | -7.25180600 |
| N                | -1.16075100 | 2.55943800  | 4.02530900   | C | -2.50756800 | 5.01404500  | -5.83807400 |
| C                | -0.74729400 | 1.56866900  | 4.91379500   | H | -2.81159500 | 6.64683100  | -7.26206000 |
| H                | 0.99370800  | 2.07133600  | 7.69978400   | H | -1.51418400 | 5.30718800  | -5.47707600 |
| H                | 0.16947400  | 0.54806500  | 7.35358500   | H | -3.23598600 | 5.39906100  | -5.11793700 |
| H                | -1.36117900 | 4.68820200  | 4.14564500   | H | -2.54999600 | 3.91566900  | -5.81766400 |
| H                | -0.67737500 | 0.53535200  | 4.62393900   | C | 2.30608800  | -3.21850000 | -7.86111000 |
| H                | -1.44472400 | 2.47206600  | 2.97578500   | C | 0.81003200  | -3.17014700 | -8.24408000 |
| C                | -3.45635800 | 13.42592600 | -6.54339700  | C | 0.03870200  | -1.91013900 | -7.86693600 |
| C                | -3.56142500 | 12.02138300 | -7.16950800  | C | -1.27019500 | -1.75435800 | -8.36349400 |
| C                | -3.40204700 | 10.92885600 | -6.08458800  | C | -2.01926400 | -0.60970100 | -8.08051900 |
| C                | -3.65883100 | 9.49267700  | -6.57282000  | C | -1.47123500 | 0.40988100  | -7.28919400 |
| C                | -2.54116300 | 11.85938000 | -8.31356100  | C | -0.17662500 | 0.26287100  | -6.78159100 |
| H                | -2.46245300 | 13.57989000 | -6.10061000  | C | 0.57432600  | -0.88727200 | -7.06608300 |
| H                | -4.57165700 | 11.91488600 | -7.59757100  | C | 2.61439800  | -3.33367300 | -6.37357700 |
| H                | -2.38561000 | 11.00791200 | -5.66344400  | O | 3.35904000  | -2.50467900 | -5.78178400 |
| H                | -4.09691700 | 11.15857600 | -5.26202600  | H | 2.82509200  | -2.32896300 | -8.22635400 |
| H                | -4.63090800 | 9.42442100  | -7.07881900  | H | 0.29271900  | -4.04639700 | -7.82467700 |
| H                | -2.89090000 | 9.16920600  | -7.28542800  | H | 0.74814000  | -3.29545800 | -9.33357600 |
| H                | -3.67021300 | 8.77761300  | -5.74139200  | H | -1.69866100 | -2.53372100 | -8.98886400 |
| H                | -2.66968500 | 12.64568700 | -9.06755200  | H | -3.02088900 | -0.50602700 | -8.48617200 |
| H                | -2.64495800 | 10.89316700 | -8.81884600  | H | -2.03758300 | 1.31423600  | -7.08824800 |
| H                | -1.51432900 | 11.93111200 | -7.92846500  | H | 0.26003100  | 1.04805500  | -6.17170800 |
| C                | 6.41541000  | 3.28040700  | -10.17807700 | H | 1.57602900  | -0.97382900 | -6.66060100 |
| C                | 5.90657900  | 2.18609500  | -9.26455200  | N | 2.05535100  | -4.39433300 | -5.72095700 |
| C                | 4.52851700  | 2.00009600  | -9.05988600  | C | 2.27132300  | -4.67564900 | -4.29089500 |
| C                | 4.05515500  | 0.96857200  | -8.24110600  | C | 0.92468800  | -4.88431400 | -3.54865500 |
| C                | 4.95295900  | 0.09976900  | -7.60578900  | C | 1.16093800  | -5.25382200 | -2.07171100 |
| C                | 6.32871200  | 0.27973400  | -7.80038500  | C | 0.03447600  | -3.63390400 | -3.66747300 |
| C                | 6.79895800  | 1.31249900  | -8.61886200  | C | 3.14101900  | -5.94162900 | -4.21742800 |
| H                | 7.40893300  | 3.62728700  | -9.87375900  | O | 2.64716500  | -7.04074400 | -4.57884500 |
| H                | 5.74204300  | 4.14451800  | -10.18310400 | H | 1.55413400  | -5.10229100 | -6.24214000 |

|   |              |              |             |    |              |             |             |
|---|--------------|--------------|-------------|----|--------------|-------------|-------------|
| H | 2.78166800   | -3.80221500  | -3.88324300 | N  | -3.90154600  | -1.11448000 | 0.16686800  |
| H | 0.42293900   | -5.73288800  | -4.03474800 | C  | -2.85796100  | -1.11660600 | -2.06730300 |
| H | 1.70602900   | -6.19529400  | -1.96184400 | C  | -3.71357000  | -0.20781000 | -2.67138000 |
| H | 0.20217700   | -5.37445600  | -1.55355900 | C  | -3.68296300  | 0.14256700  | -4.07632700 |
| H | 1.72664300   | -4.47214900  | -1.54809100 | C  | -4.73755600  | 0.98196300  | -4.29844300 |
| H | -0.94583100  | -3.82651300  | -3.21492200 | C  | -5.40235000  | 1.17027400  | -3.02802400 |
| H | -0.12609100  | -3.34168000  | -4.70965400 | N  | -4.76343500  | 0.44079300  | -2.04231300 |
| H | 0.49255700   | -2.78148200  | -3.14677800 | C  | -6.52085500  | 1.97218600  | -2.84559700 |
| N | 4.43859500   | -5.82642800  | -3.79892100 | C  | -7.13014100  | 2.21546900  | -1.62451600 |
| C | 5.36554500   | -6.97622600  | -3.93181400 | C  | -8.24919100  | 3.11030100  | -1.42932300 |
| C | 6.69313000   | -6.30472300  | -4.34229000 | C  | -8.54307400  | 3.09985900  | -0.09440100 |
| C | 6.66599100   | -4.97331800  | -3.55873500 | C  | -7.62297700  | 2.17927000  | 0.53572400  |
| C | 5.18015900   | -4.54390400  | -3.57665100 | N  | -6.75990600  | 1.65015000  | -0.41151400 |
| C | 5.54636100   | -7.79836800  | -2.64916400 | C  | -7.65742800  | 1.82214900  | 1.87626600  |
| O | 6.38840900   | -8.72802800  | -2.61248300 | C  | -6.88717700  | 0.82514600  | 2.44816400  |
| H | 4.97390000   | -7.65692100  | -4.69226700 | C  | -6.99679900  | 0.37988700  | 3.81813000  |
| H | 7.54873400   | -6.93764200  | -4.09991700 | C  | -6.09630400  | -0.63335200 | 3.98974200  |
| H | 6.69083800   | -6.11807900  | -5.42202500 | C  | -5.40791700  | -0.81229200 | 2.73207600  |
| H | 7.00333400   | -5.13857600  | -2.52898200 | N  | -5.91717100  | 0.07525300  | 1.78456000  |
| H | 7.31059500   | -4.20821800  | -4.00002100 | Fe | -5.22338700  | 0.38422600  | -0.08711700 |
| H | 4.96668400   | -3.84252200  | -4.38900600 | H  | -4.06167400  | -2.32344400 | 3.35054800  |
| H | 4.87611900   | -4.07869900  | -2.63303000 | H  | -2.07795300  | -1.55406000 | -2.67990900 |
| N | 4.78394100   | -7.46503300  | -1.57721800 | H  | -6.94994300  | 2.42958300  | -3.72799100 |
| C | 4.88428000   | -8.19687700  | -0.33055700 | H  | -8.38139000  | 2.32275700  | 2.51000400  |
| C | 4.04432800   | -7.49370600  | 0.73083400  | O  | -0.51930700  | 3.96718500  | -0.20933800 |
| O | 3.31171300   | -6.51345300  | 0.44049100  | C  | -0.91993000  | 3.99616600  | -1.46802500 |
| H | 4.11467100   | -6.70618200  | -1.60732000 | O  | -0.94825200  | 5.06630300  | -2.15150800 |
| H | 4.53518600   | -9.23245400  | -0.45677000 | C  | -1.33753000  | 2.68315400  | -2.10428300 |
| N | 4.14832400   | -8.00473200  | 1.98790700  | C  | -0.19044900  | 1.64607300  | -2.11763100 |
| C | 3.40237900   | -7.47857300  | 3.13982600  | C  | 1.04014900   | 2.08739800  | -2.92915600 |
| C | 2.34917900   | -8.45881500  | 3.68778300  | C  | 2.16760000   | 1.03874000  | -2.93366300 |
| C | 1.20559700   | -8.83371600  | 2.71592700  | C  | 3.41375500   | 1.48622900  | -3.72140000 |
| C | 0.31004600   | -9.91586600  | 3.35192500  | C  | 4.56910000   | 0.46384600  | -3.73046900 |
| C | 0.37053800   | -7.60853100  | 2.29176600  | C  | 5.24383900   | 0.25417700  | -2.36034700 |
| H | 4.76062500   | -8.79467700  | 2.14259400  | C  | 6.46681900   | -0.67487300 | -2.43493500 |
| H | 2.94140000   | -6.54693300  | 2.80618100  | H  | -1.67863700  | 2.89400300  | -3.12140900 |
| H | 2.85551300   | -9.37976700  | 4.01488500  | H  | -2.18716900  | 2.27394500  | -1.54081400 |
| H | 1.91629500   | -8.01017100  | 4.59519000  | H  | 0.10915600   | 1.43264400  | -1.08205800 |
| H | 1.66103500   | -9.26219200  | 1.80997200  | H  | -0.57920700  | 0.70631700  | -2.53190600 |
| H | -0.47945200  | -10.22940900 | 2.65940400  | H  | 1.42964600   | 3.03290400  | -2.52320300 |
| H | -0.17384300  | -9.53610900  | 4.26186300  | H  | 0.73479000   | 2.30517600  | -3.96359900 |
| H | 0.88965100   | -10.80544500 | 3.62687000  | H  | 2.44401600   | 0.81365500  | -1.89231200 |
| H | -0.46484100  | -7.91850500  | 1.65263900  | H  | 1.79192900   | 0.09610600  | -3.36187400 |
| H | 0.96791100   | -6.88533200  | 1.72732900  | H  | 3.12105200   | 1.69432700  | -4.76046000 |
| H | -0.05314800  | -7.10512400  | 3.17245100  | H  | 3.77761500   | 2.44148400  | -3.30952200 |
| C | -8.01885800  | -3.89620400  | 0.15037700  | H  | 4.20106700   | -0.49917800 | -4.11328500 |
| C | -6.74571000  | -3.09056000  | -0.13905300 | H  | 5.32975900   | 0.80303800  | -4.44779700 |
| S | -7.14636500  | -1.29051900  | -0.57338700 | H  | 5.55281500   | 1.23178400  | -1.95795200 |
| C | -8.98031600  | -3.86217900  | -1.02890900 | H  | 4.51913500   | -0.16070800 | -1.64461000 |
| O | -8.60265300  | -4.12225900  | -2.19908000 | H  | 7.22752100   | -0.26669800 | -3.11177100 |
| H | -8.50077300  | -3.52501800  | 1.06175600  | H  | 6.18385800   | -1.66429900 | -2.81579900 |
| H | -6.07766400  | -3.08459600  | 0.72655500  | O  | -1.39827000  | 5.42078600  | 2.37243000  |
| H | -6.21060700  | -3.50728300  | -0.99598400 | H  | -1.72654900  | 4.63083900  | 1.88412600  |
| N | -10.26620800 | -3.48824100  | -0.75350600 | H  | -0.84429600  | 5.95987800  | 1.77402800  |
| C | -11.30315400 | -3.44821200  | -1.78493400 | O  | -1.89167400  | 2.67240200  | 1.55820600  |
| C | -11.18915600 | -2.30885500  | -2.80600000 | H  | -2.72531100  | 2.27412000  | 1.19402700  |
| O | -11.95411900 | -2.29716300  | -3.79324500 | H  | -1.27723600  | 3.00752600  | 0.81626300  |
| H | -10.52005600 | -3.26984500  | 0.19852400  | O  | -4.13267400  | 1.55576800  | 0.35155400  |
| H | -11.28059600 | -4.37474500  | -2.36665300 | H  | -7.15807400  | -2.57289900 | -6.07215100 |
| N | -10.22205800 | -1.37161600  | -2.58180600 | H  | -6.48122800  | -3.20543000 | -4.55084300 |
| C | -9.87370000  | -0.36387300  | -3.57437900 | H  | -12.28011700 | -3.38321300 | -1.29912800 |
| C | -8.56798800  | -0.64119600  | -4.32899600 | H  | -7.73808200  | -4.94408900 | 0.32750600  |
| O | -8.01077800  | 0.29227200   | -4.96506500 | H  | -5.90061200  | -1.20995100 | 4.88220700  |
| H | -9.66164400  | -1.42125200  | -1.74048600 | H  | -2.13125000  | -3.37414300 | 1.89329000  |
| H | -9.78318900  | 0.62181900   | -3.11053200 | H  | -0.63925000  | 4.25024400  | 6.61959800  |
| H | -10.68948600 | -0.32451500  | -4.30379900 | H  | -0.67726200  | 1.82075300  | 8.23937100  |
| N | -8.09442000  | -1.91032800  | -4.28640800 | H  | 6.93152000   | -0.81371600 | -1.45131500 |
| C | -6.90860900  | -2.32407300  | -5.03343400 | H  | 3.16381800   | 6.69696800  | 5.52063000  |
| H | -8.55666000  | -2.61323900  | -3.71811500 | H  | 6.46493500   | 7.68773000  | 2.76516000  |
| H | -6.17613600  | -1.51518700  | -5.04137000 | H  | -4.39432000  | 9.69852700  | -1.48418100 |
| C | -4.36295300  | -1.69500600  | 2.51891500  | H  | -5.54226400  | 5.35760100  | -2.21662100 |
| C | -3.64792400  | -1.81859400  | 1.33294400  | H  | -3.74215900  | 5.19533300  | -7.63346600 |
| C | -2.52396800  | -2.70672200  | 1.14004300  | H  | -2.00220600  | 5.23281400  | -7.96078100 |
| C | -2.08944800  | -2.53036600  | -0.14383800 | H  | -3.61084600  | 14.20844300 | -7.29581000 |
| C | -2.95034200  | -1.54109100  | -0.75095800 | H  | -4.20279900  | 13.56653400 | -5.75142800 |

|   |             |             |              |
|---|-------------|-------------|--------------|
| H | 2.75944000  | -4.08319200 | -8.36616500  |
| H | 4.11874800  | -7.23078700 | 3.93344400   |
| H | 5.93408600  | -8.26295400 | -0.01530800  |
| H | 6.49817700  | 2.92751900  | -11.21534200 |
| H | -2.95811200 | -0.22441900 | -4.78849100  |
| H | -5.06997400 | 1.42218000  | -5.22534300  |
| H | -8.73008000 | 3.66828800  | -2.21915600  |
| H | -9.31962800 | 3.64240400  | 0.42456700   |
| H | -7.68531600 | 0.79227900  | 4.54121300   |
| H | -1.27052000 | -3.02216200 | -0.64760200  |

#### 4TS1<sub>HA,B, $\alpha$</sub>

|   |              |             |              |
|---|--------------|-------------|--------------|
| C | 4.33687300   | 9.76178000  | 1.18623200   |
| C | 5.36561900   | 9.05526600  | 0.25820300   |
| C | 4.79295800   | 8.39458000  | -1.01847600  |
| C | 4.09723600   | 9.41282700  | -1.94323400  |
| C | 5.92326800   | 7.66212300  | -1.76961200  |
| C | 3.31042000   | 8.81124500  | 1.76596400   |
| O | 2.22060200   | 8.55186900  | 1.16959500   |
| H | 3.79825800   | 10.53439200 | 0.63095600   |
| H | 6.10994700   | 9.80807400  | -0.03760800  |
| H | 5.90343400   | 8.29386500  | 0.84032600   |
| H | 4.04963000   | 7.64307100  | -0.71543400  |
| H | 3.76523000   | 8.92693700  | -2.86779700  |
| H | 3.21424200   | 9.85874600  | -1.47259000  |
| H | 4.78455700   | 10.22284800 | -2.22142200  |
| H | 5.53484100   | 7.15584400  | -2.66031100  |
| H | 6.39777100   | 6.90597600  | -1.13338300  |
| H | 6.69807800   | 8.36775000  | -2.09699400  |
| N | 3.62413800   | 8.22854800  | 2.95053700   |
| C | 2.77187100   | 7.25225200  | 3.63767300   |
| C | 3.44195100   | 5.86797400  | 3.79344700   |
| C | 3.81390000   | 5.20565300  | 2.47986100   |
| C | 2.81865600   | 4.75814100  | 1.59091100   |
| C | 3.16263000   | 4.16753300  | 0.36873500   |
| C | 4.51183500   | 4.00748900  | 0.02387800   |
| C | 5.51021500   | 4.43987400  | 0.90339100   |
| C | 5.16093400   | 5.03831900  | 2.12092700   |
| H | 4.50954300   | 8.46422600  | 3.37765400   |
| H | 1.85425300   | 7.17305000  | 3.05154600   |
| H | 4.33616900   | 5.96799800  | 4.42332600   |
| H | 2.74024000   | 5.23458600  | 4.35573900   |
| H | 1.76777800   | 4.86560100  | 1.85294900   |
| H | 2.37884700   | 3.84300000  | -0.30923300  |
| H | 4.78017200   | 3.54436300  | -0.92013900  |
| H | 6.55693800   | 4.30959600  | 0.64686000   |
| H | 5.94175300   | 5.36635800  | 2.80247600   |
| C | 1.20346800   | 0.19697600  | 6.00446800   |
| C | 0.69506400   | 1.06975700  | 4.90701300   |
| N | 0.42821100   | 2.43753700  | 5.07788100   |
| C | -0.01810300  | 2.97201600  | 3.91211700   |
| N | -0.04469600  | 1.98991100  | 3.00631200   |
| C | 0.39011800   | 0.80683000  | 3.59325300   |
| H | 2.17558700   | 0.53896000  | 6.37940300   |
| H | 1.33211000   | -0.82452300 | 5.63923200   |
| H | -0.30439500  | 3.99669700  | 3.69865900   |
| H | 0.44955000   | -0.11587800 | 3.04340100   |
| H | -0.39217100  | 2.17290600  | 1.97280400   |
| C | -9.63800800  | 11.75771100 | -2.22935000  |
| C | -9.88188200  | 10.24583700 | -2.05197300  |
| C | -8.61233800  | 9.54943700  | -1.50361900  |
| C | -8.79988100  | 8.07501200  | -1.10909800  |
| C | -10.36749400 | 9.61853200  | -3.37367400  |
| H | -8.84458400  | 11.93987900 | -2.96701900  |
| H | -10.67892600 | 10.11696600 | -1.30121700  |
| H | -7.81492400  | 9.63063200  | -2.25979000  |
| H | -8.26307300  | 10.11245600 | -0.62455000  |
| H | -9.60171900  | 7.96957300  | -0.36648900  |
| H | -9.06530500  | 7.45510800  | -1.97317500  |
| H | -7.88055400  | 7.66511400  | -0.67568700  |
| H | -11.26477600 | 10.13013800 | -3.74156000  |
| H | -10.61415200 | 8.55773000  | -3.25823000  |
| H | -9.59364700  | 9.70309000  | -4.14893700  |
| C | 9.57994100   | -0.50179400 | -10.11996700 |
| C | 8.65744000   | -1.08798400 | -9.07279700  |

|   |             |             |              |
|---|-------------|-------------|--------------|
| C | 7.28542600  | -0.78303500 | -9.06766700  |
| C | 6.43668200  | -1.30396200 | -8.08421400  |
| C | 6.94266800  | -2.14619900 | -7.08494700  |
| C | 8.30836600  | -2.45910900 | -7.08382800  |
| C | 9.15466300  | -1.93578800 | -8.06731900  |
| H | 9.04982800  | -0.31053200 | -11.05912000 |
| H | 10.41816400 | -1.17290800 | -10.33596600 |
| H | 6.88136400  | -0.13546800 | -9.84148700  |
| H | 5.37904500  | -1.05582900 | -8.10028700  |
| H | 6.27973900  | -2.55558600 | -6.32859200  |
| H | 8.71337600  | -3.11578100 | -6.31931300  |
| H | 10.21163800 | -2.18895600 | -8.06013900  |
| C | -4.56859300 | 9.35044900  | 0.01237500   |
| C | -3.24385600 | 9.40821500  | -0.79618100  |
| C | -3.26323100 | 8.53840500  | -2.06796200  |
| C | -1.87949300 | 8.35791600  | -2.72577700  |
| N | -1.01104300 | 7.42006400  | -1.99735300  |
| C | -0.10364700 | 7.72078200  | -1.06234000  |
| N | 0.20771600  | 8.99548900  | -0.72444500  |
| N | 0.52999800  | 6.71946400  | -0.40657500  |
| C | -4.75496100 | 8.00819000  | 0.70169200   |
| O | -5.39675200 | 7.07100000  | 0.14155200   |
| H | -5.41907500 | 9.48886100  | -0.66194500  |
| H | -2.41641700 | 9.09635800  | -0.14647000  |
| H | -3.05029200 | 10.45430700 | -1.07446700  |
| H | -3.66685100 | 7.54551400  | -1.83976700  |
| H | -3.94092900 | 8.99175200  | -2.80453500  |
| H | -2.00489400 | 7.93569600  | -3.72723000  |
| H | -1.37745000 | 9.32616100  | -2.86060800  |
| H | -1.07961000 | 6.41544200  | -2.29067000  |
| H | -0.20748200 | 9.77771500  | -1.19868000  |
| H | 0.95194400  | 9.14808200  | -0.04386000  |
| H | 0.40801100  | 5.72877100  | -0.71025100  |
| H | 1.30994200  | 6.96995600  | 0.19275500   |
| N | -4.17192600 | 7.82841000  | 1.91784300   |
| C | -4.28323300 | 6.53365100  | 2.63858300   |
| C | -3.78324600 | 6.86503300  | 4.05494100   |
| C | -2.75794600 | 7.99466000  | 3.81508800   |
| C | -3.40328600 | 8.83363600  | 2.69456500   |
| H | -3.64354200 | 5.78549800  | 2.15674800   |
| H | -4.60908000 | 7.22584100  | 4.68011700   |
| H | -3.34093400 | 5.99369500  | 4.54504000   |
| H | -2.55210200 | 8.59048600  | 4.70890500   |
| H | -1.81612800 | 7.55955800  | 3.46111800   |
| H | -2.65947900 | 9.33499500  | 2.06957500   |
| H | -4.07614800 | 9.59799400  | 3.10721800   |
| C | -0.78622900 | 5.74477600  | -7.21310500  |
| C | -2.01243800 | 5.80882900  | -6.29063700  |
| H | 0.04822900  | 6.32897900  | -6.80645900  |
| H | -1.78337000 | 5.41526200  | -5.29363400  |
| H | -2.36632700 | 6.84273300  | -6.17882400  |
| H | -2.84521300 | 5.22455100  | -6.70215100  |
| C | 3.87496600  | -4.75991500 | -7.31216400  |
| C | 2.56892300  | -4.83789900 | -8.13200800  |
| C | 1.64159900  | -3.63100900 | -8.06071200  |
| C | 0.33456000  | -3.75334300 | -8.57026200  |
| C | -0.54055200 | -2.66390300 | -8.58288600  |
| C | -0.12486400 | -1.42461100 | -8.07711200  |
| C | 1.16636600  | -1.29339700 | -7.55686100  |
| C | 2.04378700  | -2.38602800 | -7.54845200  |
| C | 3.70596500  | -4.58566100 | -5.80868500  |
| O | 4.29248000  | -3.66483900 | -5.17694400  |
| H | 4.50276500  | -3.93554200 | -7.65779200  |
| H | 2.00159100  | -5.73643600 | -7.84962100  |
| H | 2.85627300  | -5.00032400 | -9.18116600  |
| H | 0.00615100  | -4.70959800 | -8.97002500  |
| H | -1.53998600 | -2.77877900 | -8.99115400  |
| H | -0.79762200 | -0.57294800 | -8.09452500  |
| H | 1.49782600  | -0.33912100 | -7.15845000  |
| H | 3.03485100  | -2.26217700 | -7.12704000  |
| N | 2.90750100  | -5.49767300 | -5.18165900  |
| C | 2.67784800  | -5.51620400 | -3.72651000  |
| C | 1.17323600  | -5.69830500 | -3.39542600  |
| C | 0.94811800  | -5.71598100 | -1.87151300  |
| C | 0.31915300  | -4.60263400 | -4.05952600  |

|   |              |              |             |    |              |             |             |
|---|--------------|--------------|-------------|----|--------------|-------------|-------------|
| C | 3.51464700   | -6.68756500  | -3.18017300 | C  | -3.31613800  | -2.64866100 | 0.70692200  |
| O | 3.19510500   | -7.86218800  | -3.49816100 | C  | -2.69622500  | -2.96026700 | -0.47291300 |
| H | 2.54917800   | -6.29095900  | -5.69732100 | C  | -2.91252500  | -1.84872200 | -1.37193000 |
| H | 3.02352800   | -4.55192400  | -3.35200300 | N  | -3.65002800  | -0.86281300 | -0.73106400 |
| H | 0.87776400   | -6.67880700  | -3.79532700 | C  | -2.50337300  | -1.80943800 | -2.69898900 |
| H | 1.46748200   | -6.53975200  | -1.37419600 | C  | -2.81356100  | -0.80102800 | -3.60416400 |
| H | -0.11931500  | -5.83266400  | -1.64888600 | C  | -2.58086100  | -0.87129300 | -5.03251300 |
| H | 1.28192900   | -4.77454100  | -1.41388500 | C  | -3.16736500  | 0.23362700  | -5.58698300 |
| H | -0.74417200  | -4.78774100  | -3.86187400 | C  | -3.71606900  | 1.00942200  | -4.49659600 |
| H | 0.45981100   | -4.56795300  | -5.14359200 | N  | -3.49361300  | 0.36519300  | -3.29452400 |
| H | 0.57522600   | -3.61255900  | -3.65840200 | C  | -4.30867600  | 2.26195300  | -4.63821900 |
| N | 4.62197000   | -6.41808200  | -2.42286400 | C  | -4.67713000  | 3.08316800  | -3.58100600 |
| C | 5.61765900   | -7.48766400  | -2.16303400 | C  | -5.12421700  | 4.45435000  | -3.70212200 |
| C | 6.95876600   | -6.72382700  | -2.16370500 | C  | -5.32594600  | 4.92590800  | -2.43466000 |
| C | 6.58263500   | -5.35355100  | -1.55889600 | C  | -5.04444000  | 3.83173200  | -1.52833500 |
| C | 5.17744400   | -5.05954600  | -2.12929000 | N  | -4.63148300  | 2.71971900  | -2.24282700 |
| C | 5.42161000   | -8.25401100  | -0.84920000 | C  | -5.28796100  | 3.87054600  | -0.16005500 |
| O | 6.28626100   | -9.08200400  | -0.47153900 | C  | -5.24324400  | 2.76765600  | 0.68272600  |
| H | 5.54872700   | -8.22985900  | -2.96374300 | C  | -5.68398100  | 2.75542000  | 2.06089100  |
| H | 7.71788900   | -7.26198400  | -1.59317000 | C  | -5.53557600  | 1.47844800  | 2.52620000  |
| H | 7.31476800   | -6.60563600  | -3.19328300 | C  | -4.97403700  | 0.69419700  | 1.44878400  |
| H | 6.54524000   | -5.42405600  | -0.46536500 | N  | -4.82230300  | 1.49572600  | 0.31647100  |
| H | 7.29409400   | -4.56446000  | -1.81781600 | Fe | -4.05826300  | 0.96735600  | -1.47233200 |
| H | 5.22665000   | -4.46965800  | -3.05046100 | H  | -4.70545200  | -1.12473800 | 2.49798400  |
| H | 4.54316400   | -4.52961900  | -1.41097000 | H  | -1.95034300  | -2.66338200 | -3.07598600 |
| N | 4.29447200   | -8.00587000  | -0.13815500 | H  | -4.46334300  | 2.62153000  | -5.64866400 |
| C | 3.99277000   | -8.74880400  | 1.06853900  | H  | -5.59343200  | 4.82845300  | 0.24908900  |
| C | 2.61364000   | -8.33963800  | 1.57492900  | O  | 0.11028800   | 4.08639700  | -1.12491900 |
| O | 1.98031200   | -7.38802400  | 1.04978900  | C  | -0.58063000  | 3.89965300  | -2.23497500 |
| H | 3.60020800   | -7.33729800  | -0.44613700 | O  | -1.10678500  | 4.86256500  | -2.88525500 |
| H | 4.02853400   | -9.82850100  | 0.86914500  | C  | -0.78988100  | 2.49724500  | -2.71024000 |
| N | 2.14281800   | -9.06239500  | 2.62618100  | C  | 0.35175600   | 1.50724700  | -2.55242700 |
| C | 0.84025500   | -8.81584500  | 3.26170900  | C  | 1.52570800   | 1.77909600  | -3.52451200 |
| C | -0.16337200  | -9.96666400  | 3.06409100  | C  | 2.66189900   | 0.74888600  | -3.38496600 |
| C | -0.57023700  | -10.26229200 | 1.60133400  | C  | 3.82511300   | 1.00024300  | -4.36316800 |
| C | -1.48486900  | -11.50295600 | 1.55246700  | C  | 4.95545200   | -0.04770300 | -4.29563800 |
| C | -1.24763100  | -9.05300700  | 0.92559500  | C  | 5.76967600   | 0.02353700  | -2.98711400 |
| H | 2.69774800   | -9.83362400  | 2.97293100  | C  | 6.92405000   | -1.03974800 | -2.99172800 |
| H | 0.46273900   | -7.88470200  | 2.83469800  | H  | -1.28986200  | 2.47435100  | -3.67968200 |
| H | 0.25060200   | -10.88300200 | 3.51207500  | H  | -1.72475500  | 2.01899500  | -1.89886000 |
| H | -1.06648700  | -9.72429400  | 3.64508000  | H  | 0.72360200   | 1.53846300  | -1.52079300 |
| H | 0.34547100   | -10.49620300 | 1.03687500  | H  | -0.02884200  | 0.49302900  | -2.72773900 |
| H | -1.74190000  | -11.76004200 | 0.51866900  | H  | 1.91946500   | 2.78939700  | -3.34228900 |
| H | -2.42204600  | -11.31821200 | 2.09428600  | H  | 1.14896700   | 1.77119900  | -4.55766200 |
| H | -1.00112500  | -12.37644500 | 2.00656900  | H  | 3.03165200   | 0.76204300  | -2.34928700 |
| H | -1.57775800  | -9.31627400  | -0.08624300 | H  | 2.26087500   | -0.26156700 | -3.55838000 |
| H | -0.56535800  | -8.20101300  | 0.83931200  | H  | 3.42195700   | 1.02130800  | -5.38694400 |
| H | -2.13458400  | -8.73816200  | 1.49309900  | H  | 4.24381100   | 2.00287900  | -4.18096100 |
| C | -8.45999600  | -1.51660700  | -1.31395100 | H  | 4.53607300   | -1.05369200 | -4.44365400 |
| C | -6.93685100  | -1.33489800  | -1.37375800 | H  | 5.64392400   | 0.12031500  | -5.13600000 |
| S | -6.47570900  | 0.42210700   | -1.91523800 | H  | 6.17307800   | 0.98948400  | -2.83174100 |
| C | -9.12033600  | -1.25618200  | -2.65980800 | H  | 5.11098500   | -0.22842200 | -2.13087500 |
| O | -8.77490400  | -1.86969300  | -3.70082900 | H  | 7.61425100   | -0.84611900 | -3.82164300 |
| H | -8.88390700  | -0.87155600  | -0.53639300 | H  | 6.54144200   | -2.06066700 | -3.11621800 |
| H | -6.49062600  | -1.51308100  | -0.39159700 | O  | -0.92960500  | 5.09839000  | 2.07442100  |
| H | -6.49248500  | -2.02460700  | -2.09558400 | H  | -1.18706800  | 4.28860800  | 1.55437500  |
| N | -10.08895800 | -0.29036900  | -2.68103900 | H  | -0.64580000  | 5.79586200  | 1.44877000  |
| C | -10.85789600 | 0.01797700   | -3.88509400 | O  | -0.94495500  | 2.69447000  | 0.75305400  |
| C | -10.11410400 | 0.77524300   | -4.99061600 | H  | -1.66344000  | 2.19155700  | 0.23583500  |
| O | -10.69298200 | 0.98373300   | -6.07832000 | H  | -0.36567000  | 3.16450100  | 0.05196100  |
| H | -10.30278600 | 0.20642000   | -1.82913400 | O  | -2.42701600  | 1.53483300  | -1.01649200 |
| H | -11.20602100 | -0.91287400  | -4.34420600 | H  | -6.09384200  | -1.44438100 | -7.68314500 |
| N | -8.82748800  | 1.14996500   | -4.73153900 | H  | -6.88919700  | -2.63648600 | -6.61807800 |
| C | -7.95868500  | 1.67806100   | -5.77312100 | H  | -11.73938700 | 0.59884000  | -3.60237600 |
| C | -6.95684700  | 0.66693800   | -6.34208800 | H  | -8.67613700  | -2.55750400 | -1.03581700 |
| O | -5.99677900  | 1.08177700   | -7.04705000 | H  | -5.77158200  | 1.09267600  | 3.50754800  |
| H | -8.43061500  | 0.99454500   | -3.81290700 | H  | -3.37673700  | -3.24295300 | 1.60713600  |
| H | -7.39112900  | 2.53437100   | -5.40044300 | H  | 0.54505300   | 2.94687300  | 5.94041400  |
| H | -8.59604800  | 2.02083600   | -6.59466200 | H  | 0.50869200   | 0.16118800  | 6.85218300  |
| N | -7.18211500  | -0.64157300  | -6.08026000 | H  | 7.49818500   | -1.00180200 | -2.05792000 |
| C | -6.34046000  | -1.69317900  | -6.64798300 | H  | 2.50723700   | 7.64593100  | 4.62753300  |
| H | -7.91318200  | -0.91966000  | -5.43247300 | H  | 4.87907500   | 10.26372800 | 1.99751600  |
| H | -5.40297400  | -1.80540900  | -6.09156500 | H  | -4.58863000  | 10.16732600 | 0.74221300  |
| C | -4.55692900  | -0.62297800  | 1.54710000  | H  | -5.31772500  | 6.18220500  | 2.60749800  |
| C | -3.89499400  | -1.33358200  | 0.54531000  | H  | -1.01244100  | 6.13764700  | -8.21142400 |

|   |              |             |             |
|---|--------------|-------------|-------------|
| H | -0.43650300  | 4.71271100  | -7.33458200 |
| H | -10.54278800 | 12.26679200 | -2.58192500 |
| H | -9.33350500  | 12.22607300 | -1.28515700 |
| H | 4.44661400   | -5.68206900 | -7.48862200 |
| H | 1.00151000   | -8.65044600 | 4.33479100  |
| H | 4.74786300   | -8.55440300 | 1.84421100  |
| H | 10.00673400  | 0.45433800  | -9.78664600 |
| H | -2.05948000  | -1.67263100 | -5.53553600 |
| H | -3.26316200  | 0.50461200  | -6.62670300 |
| H | -5.24128800  | 4.97694800  | -4.63992300 |
| H | -5.65090100  | 5.90197600  | -2.10653100 |
| H | -6.07546800  | 3.61564700  | 2.58375600  |
| H | -2.15268100  | -3.85901700 | -0.72600600 |

**<sup>4</sup>TS1<sub>HA,B,β</sub>**

|   |              |             |             |
|---|--------------|-------------|-------------|
| C | 4.87181500   | 10.01127400 | -0.05024800 |
| C | 5.86288800   | 9.22121200  | -0.95115500 |
| C | 5.24349900   | 8.48234900  | -2.16138100 |
| C | 4.53511400   | 9.44283800  | -3.13653500 |
| C | 6.34055300   | 7.67973400  | -2.88967200 |
| C | 3.84870300   | 9.12008900  | 0.62251500  |
| O | 2.72166900   | 8.87078500  | 0.09421300  |
| H | 4.32949400   | 10.75131100 | -0.64429100 |
| H | 6.61313200   | 9.93593300  | -1.31834600 |
| H | 6.40149600   | 8.49206700  | -0.32981800 |
| H | 4.49961900   | 7.76487700  | -1.78486800 |
| H | 4.16346200   | 8.89575000  | -4.01047600 |
| H | 3.67653400   | 9.94039800  | -2.67271400 |
| H | 5.22676500   | 10.21577900 | -3.49744800 |
| H | 5.91818100   | 7.11883300  | -3.73102100 |
| H | 6.82051200   | 6.96199800  | -2.21437600 |
| H | 7.11638100   | 8.34711600  | -3.28760300 |
| N | 4.20809700   | 8.57415400  | 1.81076300  |
| C | 3.37121300   | 7.64141200  | 2.57369700  |
| C | 4.03768800   | 6.26191700  | 2.77213500  |
| C | 4.36123800   | 5.53321600  | 1.48035600  |
| C | 3.33577000   | 5.11427500  | 0.61185000  |
| C | 3.63690900   | 4.45339000  | -0.58533400 |
| C | 4.97139200   | 4.18885300  | -0.92486400 |
| C | 5.99812100   | 4.59377700  | -0.06490800 |
| C | 5.69321400   | 5.26576500  | 1.12617100  |
| H | 5.12198000   | 8.79727500  | 2.18111500  |
| H | 2.43349200   | 7.54238400  | 2.02381700  |
| H | 4.95375200   | 6.38391500  | 3.36595300  |
| H | 3.35230700   | 5.66120700  | 3.38815700  |
| H | 2.29515100   | 5.29421200  | 0.87458500  |
| H | 2.83329500   | 4.15039200  | -1.24993200 |
| H | 5.20294000   | 3.66353500  | -1.84603100 |
| H | 7.03364200   | 4.38473100  | -0.31548200 |
| H | 6.49629300   | 5.57298400  | 1.79157800  |
| C | 1.98653500   | 0.92161500  | 5.26668600  |
| C | 1.43555600   | 1.76956100  | 4.17035800  |
| N | 1.12054400   | 3.12792500  | 4.33692800  |
| C | 0.64331700   | 3.63823100  | 3.17208000  |
| N | 0.64576900   | 2.65101800  | 2.27249200  |
| C | 1.12790600   | 1.48758900  | 2.86115600  |
| H | 2.95203800   | 1.29709000  | 5.62659100  |
| H | 2.14330700   | -0.09737600 | 4.90537000  |
| H | 0.31374300   | 4.64781000  | 2.95419900  |
| H | 1.21486100   | 0.56462800  | 2.31452400  |
| H | 0.26989600   | 2.80439300  | 1.24384200  |
| C | -9.88987900  | 10.88952000 | -2.58631000 |
| C | -9.85598400  | 9.44015200  | -2.06160100 |
| C | -8.40040900  | 9.00413700  | -1.76396300 |
| C | -8.25886500  | 7.63998000  | -1.06815200 |
| C | -10.55959200 | 8.49053900  | -3.05107700 |
| H | -9.34541300  | 10.97078700 | -3.53684100 |
| H | -10.41067400 | 9.41113400  | -1.10921300 |
| H | -7.83658000  | 8.99533100  | -2.71048500 |
| H | -7.93220000  | 9.77575400  | -1.13333700 |
| H | -8.82817700  | 7.62035200  | -0.12920600 |
| H | -8.62971600  | 6.82382800  | -1.69861500 |
| H | -7.20945700  | 7.42870400  | -0.83427700 |
| H | -11.58386000 | 8.82590000  | -3.25286600 |
| H | -10.61528500 | 7.46630100  | -2.66705700 |

|   |              |             |              |
|---|--------------|-------------|--------------|
| H | -10.02257800 | 8.46308500  | -4.00898100  |
| C | 6.06943200   | 4.13661700  | -5.73237800  |
| C | 5.65035400   | 2.76332000  | -5.25344400  |
| C | 4.55559400   | 2.10117100  | -5.83591200  |
| C | 4.19083000   | 0.81397700  | -5.42409700  |
| C | 4.91174300   | 0.15998300  | -4.41449600  |
| C | 6.00134200   | 0.81393800  | -3.82430100  |
| C | 6.36500100   | 2.10102400  | -4.23906700  |
| H | 6.55197000   | 4.71164100  | -4.93427200  |
| H | 5.21128900   | 4.71302400  | -6.09513400  |
| H | 3.99107600   | 2.59562100  | -6.62225800  |
| H | 3.34814600   | 0.31773500  | -5.89686200  |
| H | 4.62973500   | -0.84201000 | -4.10241600  |
| H | 6.57151000   | 0.31884700  | -3.04368800  |
| H | 7.22068500   | 2.59319800  | -3.78293000  |
| C | -4.10849200  | 9.73810500  | -0.99886000  |
| C | -2.81994100  | 9.81353800  | -1.86500500  |
| C | -2.82962800  | 8.81996200  | -3.04384400  |
| C | -1.45565000  | 8.61623500  | -3.71515900  |
| N | -0.58452900  | 7.69325000  | -2.97203800  |
| C | 0.33915800   | 8.00807000  | -2.06034600  |
| N | 0.67071800   | 9.28685500  | -1.75838600  |
| N | 0.97381200   | 7.01493100  | -1.39080700  |
| C | -4.10018400  | 8.51105400  | -0.10142900  |
| O | -4.57401700  | 7.40714600  | -0.50333900  |
| H | -4.98657500  | 9.66145200  | -1.64742200  |
| H | -1.94992800  | 9.62430100  | -1.22240900  |
| H | -2.71222700  | 10.83643400 | -2.25272300  |
| H | -3.18975300  | 7.84276700  | -2.70379000  |
| H | -3.54102800  | 9.17397400  | -3.80248000  |
| H | -1.59588800  | 8.16498300  | -4.70183800  |
| H | -0.95041100  | 9.57733200  | -3.88497800  |
| H | -0.66621300  | 6.67898900  | -3.23530100  |
| H | 0.25635000   | 10.06123300 | -2.24610000  |
| H | 1.43014200   | 9.44721400  | -1.09630900  |
| H | 0.83665800   | 6.02163800  | -1.66818000  |
| H | 1.77192600   | 7.26877600  | -0.81745700  |
| N | -3.51942500  | 8.62293200  | 1.12327200   |
| C | -3.43700000  | 7.46144100  | 2.04796900   |
| C | -3.05335700  | 8.10152300  | 3.39410700   |
| C | -2.22895900  | 9.34190800  | 2.98308600   |
| C | -2.95138600  | 9.85686400  | 1.72292900   |
| H | -2.66721100  | 6.76030200  | 1.70251300   |
| H | -3.95132700  | 8.40940300  | 3.94341900   |
| H | -2.48953500  | 7.41281600  | 4.02935600   |
| H | -2.17654700  | 10.10304200 | 3.76661000   |
| H | -1.20441600  | 9.04348500  | 2.72988900   |
| H | -2.26966900  | 10.35796400 | 1.02980600   |
| H | -3.75261000  | 10.56118900 | 1.98493600   |
| C | -0.91871800  | 6.46290700  | -7.97418900  |
| C | -2.05787100  | 6.01068100  | -7.04819400  |
| H | -0.31430900  | 7.25099800  | -7.50782900  |
| H | -1.67149700  | 5.61970600  | -6.09955400  |
| H | -2.73820700  | 6.84402500  | -6.82354400  |
| H | -2.65745700  | 5.22231000  | -7.52074600  |
| C | 4.37031700   | -3.49790100 | -6.27322200  |
| C | 3.55831600   | -3.84538000 | -7.53709600  |
| C | 2.23327100   | -3.11645100 | -7.72343000  |
| C | 1.50759300   | -3.33719800 | -8.90994800  |
| C | 0.29647900   | -2.68376200 | -9.14743600  |
| C | -0.21673100  | -1.79031100 | -8.19765400  |
| C | 0.49095500   | -1.56470600 | -7.01401900  |
| C | 1.70680400   | -2.22290900 | -6.77631000  |
| C | 3.78024100   | -3.91780100 | -4.93082400  |
| O | 3.76582100   | -3.13032300 | -3.94405100  |
| H | 4.54841300   | -2.42105700 | -6.21668800  |
| H | 3.37949700   | -4.93035900 | -7.58542300  |
| H | 4.19750800   | -3.62833700 | -8.40415300  |
| H | 1.90093700   | -4.02497400 | -9.65442100  |
| H | -0.24407000  | -2.86699700 | -10.07076400 |
| H | -1.15479700  | -1.27633400 | -8.38230700  |
| H | 0.09796000   | -0.87900600 | -6.26996900  |
| H | 2.23167700   | -2.03765700 | -5.84543100  |
| N | 3.32156400   | -5.19810000 | -4.84234400  |
| C | 2.84364200   | -5.80970100 | -3.58965600  |

|   |              |              |             |    |              |             |             |
|---|--------------|--------------|-------------|----|--------------|-------------|-------------|
| C | 1.38863400   | -6.33513600  | -3.70978200 | H  | -5.77168700  | -2.32778000 | -4.97917900 |
| C | 0.92139400   | -6.93408000  | -2.36955600 | C  | -3.66569800  | -0.12011000 | 1.78989800  |
| C | 0.43303800   | -5.21961000  | -4.17138200 | C  | -3.24438500  | -1.02331100 | 0.81447800  |
| C | 3.83556000   | -6.94940900  | -3.30081400 | C  | -2.80384900  | -2.37405900 | 1.07934300  |
| O | 3.88276900   | -7.92720100  | -4.09154900 | C  | -2.41781800  | -2.91154600 | -0.11938300 |
| H | 3.41008600   | -5.82736200  | -5.62978700 | C  | -2.63598300  | -1.89899700 | -1.12718000 |
| H | 2.88097400   | -5.02364600  | -2.83510000 | N  | -3.14922200  | -0.75133500 | -0.53898200 |
| H | 1.39807300   | -7.13539700  | -4.46306300 | C  | -2.40812900  | -2.07175700 | -2.48672800 |
| H | 1.51569500   | -7.79611700  | -2.05350600 | C  | -2.69272600  | -1.13543000 | -3.47186500 |
| H | -0.11730200  | -7.27445700  | -2.44690700 | C  | -2.63997500  | -1.39537900 | -4.89682900 |
| H | 0.96363300   | -6.17826000  | -1.57223200 | C  | -3.13492100  | -0.28511000 | -5.52315700 |
| H | -0.58289100  | -6.61777200  | -4.27984900 | C  | -3.45461800  | 0.67326500  | -4.48704800 |
| H | 0.73430400   | -4.79211800  | -5.13206000 | N  | -3.17330400  | 0.14330500  | -3.24213600 |
| H | 0.40337000   | -4.40370700  | -3.43586300 | C  | -3.94079500  | 1.95639700  | -4.72280300 |
| N | 4.69450300   | -6.83157600  | -2.24265000 | C  | -4.14401600  | 2.91921800  | -3.74402000 |
| C | 5.86182200   | -7.74162500  | -2.12610900 | C  | -4.51235600  | 4.29584500  | -3.99243500 |
| C | 6.95231200   | -6.83295300  | -1.52136800 | C  | -4.55779400  | 4.92647500  | -2.78046100 |
| C | 6.14904700   | -5.89848500  | -0.59027500 | C  | -4.24851200  | 3.93250900  | -1.77495000 |
| C | 4.83733600   | -5.63211700  | -1.36149700 | N  | -3.98814000  | 2.71200900  | -2.37973500 |
| C | 5.63682900   | -8.98114800  | -1.24904600 | C  | -4.31152200  | 4.16712000  | -0.40660700 |
| O | 6.60747500   | -9.71896900  | -0.94943400 | C  | -4.21064800  | 3.18473700  | 0.56887900  |
| H | 6.11609600   | -8.11071800  | -3.12404100 | C  | -4.44519100  | 3.38868100  | 1.98277300  |
| H | 7.71051300   | -7.42290000  | -1.00347900 | C  | -4.31306300  | 2.17471200  | 2.59664200  |
| H | 7.43915800   | -6.25829400  | -2.31749000 | C  | -3.97166600  | 1.21331900  | 1.56985100  |
| H | 5.93716100   | -6.40694200  | 0.35759100  | N  | -3.92954000  | 1.84590700  | 0.32947300  |
| H | 6.67770900   | -4.96929500  | -0.35967000 | Fe | -3.45792800  | 1.01810600  | -1.45958900 |
| H | 4.90407600   | -4.72339400  | -1.96971200 | H  | -3.71517400  | -0.48180800 | 2.81212500  |
| H | 3.97525900   | -5.53648800  | -0.69401800 | H  | -2.02457200  | -3.03401000 | -2.81016500 |
| N | 4.37304800   | -9.23250200  | -0.83324400 | H  | -4.16736900  | 2.21585100  | -5.74986500 |
| C | 4.05284400   | -10.41532400 | -0.06000900 | H  | -4.51438800  | 5.18911200  | -0.10048000 |
| C | 2.55839400   | -10.41066500 | 0.25011900  | O  | 0.56928800   | 4.33031500  | -2.09610400 |
| O | 1.82235600   | -9.45722100  | -0.11189800 | C  | -0.07788400  | 4.17773500  | -3.22559600 |
| H | 3.59665700   | -8.62996900  | -1.07537900 | O  | -0.66696000  | 5.14163200  | -3.81544800 |
| H | 4.32546600   | -11.32419800 | -0.61464600 | C  | -0.09037800  | 2.82446200  | -3.93658200 |
| N | 2.10223100   | -11.49027800 | 0.93768900  | C  | -0.00403900  | 1.54125300  | -3.12227900 |
| C | 0.69458200   | -11.67045000 | 1.32526200  | C  | 1.28512300   | 1.22614000  | -2.37740800 |
| C | 0.00749700   | -12.84075300 | 0.59814900  | C  | 1.30271500   | -0.17693800 | -1.74336100 |
| C | -0.10122500  | -12.70775000 | -0.93912800 | C  | 2.61687400   | -0.47351900 | -0.99561700 |
| C | -0.68731900  | -14.00276400 | -1.53710400 | C  | 2.72938100   | -1.91610400 | -0.46145600 |
| C | -0.93349500  | -11.48126100 | -1.36448500 | C  | 1.75167900   | -2.25300000 | 0.68098800  |
| H | 2.75358900   | -12.22692400 | 1.17459500  | C  | 1.87853600   | -3.70101700 | 1.18218900  |
| H | 0.19343800   | -10.72412500 | 1.11339400  | H  | 0.77229700   | 2.84760800  | -4.62839700 |
| H | 0.54054600   | -13.77323600 | 0.83977400  | H  | -0.98329700  | 2.81453800  | -4.56664800 |
| H | -1.00294600  | -12.94875900 | 1.02113100  | H  | -0.97471000  | 1.53793300  | -2.20131900 |
| H | 0.91678000   | -12.58165100 | -1.33933200 | H  | -0.35316300  | 0.68603300  | -3.71329400 |
| H | -0.72814800  | -13.94623200 | -2.63084500 | H  | 1.47705500   | 1.98672900  | -1.61256800 |
| H | -1.70925300  | -14.17216800 | -1.17263000 | H  | 2.12309800   | 1.30762400  | -3.09314000 |
| H | -0.08493000  | -14.87876800 | -1.26683400 | H  | 0.44155000   | -0.26988500 | -1.06858400 |
| H | -1.03976500  | -11.45171200 | -2.45533400 | H  | 1.16798500   | -0.93251400 | -2.53207500 |
| H | -0.46379700  | -10.54262400 | -1.05327000 | H  | 3.45699200   | -0.28505900 | -1.67761600 |
| H | -1.94321600  | -11.52824300 | -0.93368600 | H  | 2.73368400   | 0.23862300  | -0.16136500 |
| C | -8.04547000  | -0.81111600  | -0.32303800 | H  | 2.58212000   | -2.61220600 | -1.30005500 |
| C | -6.53432000  | -0.84960600  | -0.58659000 | H  | 3.75613900   | -2.08493300 | -0.10297800 |
| S | -5.96746300  | 0.67911000   | -1.55017200 | H  | 1.94070100   | -1.56297000 | 1.52101200  |
| C | -8.84280200  | -0.72304500  | -1.61561500 | H  | 0.71710200   | -2.07356900 | 0.35906200  |
| O | -8.66687000  | -1.52994100  | -2.56259800 | H  | 2.90437300   | -3.92136100 | 1.50429700  |
| H | -8.28872000  | 0.02189100   | 0.34607600  | H  | 1.61532900   | -4.41364800 | 0.39008300  |
| H | -5.97782800  | -0.87946900  | 0.35425100  | O  | -0.36290400  | 5.63828000  | 1.25794700  |
| H | -6.26682700  | -1.72493400  | -1.18348900 | H  | -0.63265000  | 4.80179200  | 0.78333800  |
| N | -9.73963000  | 0.30641300   | -1.70463000 | H  | -0.12927300  | 6.31450600  | 0.58998900  |
| C | -10.62064800 | 0.47390100   | -2.85878600 | O  | -0.39070500  | 3.22379700  | 0.03569400  |
| C | -9.96051800  | 0.96981100   | -4.15026200 | H  | -1.06803500  | 2.54620400  | -0.34230400 |
| O | -10.64436800 | 1.03740800   | -5.19396700 | H  | 0.10086000   | 3.60780100  | -0.76600700 |
| H | -9.81824000  | 0.95490900   | -0.93554400 | O  | -1.73461600  | 1.49126500  | -1.24728700 |
| H | -11.08129700 | -0.48701200  | -3.10912000 | H  | -6.05303900  | -1.80426800 | -6.65407700 |
| N | -8.63301000  | 1.28115200   | -4.09097400 | H  | -7.25068800  | -2.84033700 | -5.82907100 |
| C | -7.85542300  | 1.56478700   | -5.28834200 | H  | -11.42231300 | 1.16780700  | -2.59366800 |
| C | -6.97870000  | 0.40417400   | -5.77324300 | H  | -8.33675800  | -1.74075700 | 0.18592200  |
| O | -6.09001300  | 0.63001500   | -6.63860800 | H  | -4.42990200  | 1.93802700  | 3.64455900  |
| H | -8.14568100  | 1.24809400   | -3.20423600 | H  | -2.79159700  | -2.83855000 | 2.05473600  |
| H | -7.20285300  | 2.42638900   | -5.12613200 | H  | 1.22461300   | 3.64554500  | 5.19603500  |
| H | -8.55869100  | 1.81308300   | -6.08974600 | H  | 1.30462500   | 0.86846500  | 6.12395400  |
| N | -7.24078600  | -0.82052200  | -5.25705000 | H  | 1.21237200   | -3.89504100 | 2.03130000  |
| C | -6.53739500  | -2.02127200  | -5.70091800 | H  | 3.14320000   | 8.08481100  | 3.55169600  |
| H | -7.91452300  | -0.92417700  | -4.50417700 | H  | 5.44391300   | 10.55962000 | 0.70891600  |



|   |              |              |             |
|---|--------------|--------------|-------------|
| H | -4.21395300  | 10.65416900  | -0.40881300 |
| H | -4.39870900  | 6.94176900   | 2.06844900  |
| H | -1.30271700  | 6.85646700   | -8.92279600 |
| H | -0.24591300  | 5.62968300   | -8.20919300 |
| H | -10.91884100 | 11.22447800  | -2.76254400 |
| H | -9.42652800  | 11.58254100  | -1.87297100 |
| H | 5.35763900   | -3.97452600  | -6.35836600 |
| H | 0.65158300   | -11.83510700 | 2.40935200  |
| H | 4.63500400   | -10.43532800 | 0.87184300  |
| H | 6.78675900   | 4.06739400   | -6.56156100 |
| H | -2.29655000  | -2.31729100  | -5.34240100 |
| H | -3.31762800  | -0.12215800  | -6.57373200 |
| H | -4.68863300  | 4.71184300   | -4.97303100 |
| H | -4.79495400  | 5.95339700   | -2.54560500 |
| H | -4.69744700  | 4.33990200   | 2.42784000  |
| H | -2.03222500  | -3.90140700  | -0.31547000 |

**4IM1**<sub>HA,B, $\alpha$</sub>

|   |              |             |             |
|---|--------------|-------------|-------------|
| C | 4.37509300   | 10.07104100 | 0.88071100  |
| C | 5.41714600   | 9.38753900  | -0.04961300 |
| C | 4.85320300   | 8.68694800  | -1.30888700 |
| C | 4.10132200   | 9.66183700  | -2.23599600 |
| C | 6.00163100   | 7.99071900  | -2.06716000 |
| C | 3.38107000   | 9.09584200  | 1.47595000  |
| O | 2.29406300   | 8.80206000  | 0.89025400  |
| H | 3.80917500   | 10.82197800 | 0.32292000  |
| H | 6.13063500   | 10.16181200 | -0.36544500 |
| H | 5.98897300   | 8.65461500  | 0.53655200  |
| H | 4.14673500   | 7.90929000  | -0.98418300 |
| H | 3.77701500   | 9.14941000  | -3.14890200 |
| H | 3.20697200   | 10.07555300 | -1.75759800 |
| H | 4.74917000   | 10.49651500 | -2.53545600 |
| H | 5.62166400   | 7.45948200  | -2.94690200 |
| H | 6.51357100   | 7.26101100  | -1.42902100 |
| H | 6.74385100   | 8.72232900  | -2.41259000 |
| N | 3.72011900   | 8.52917400  | 2.66095800  |
| C | 2.90093400   | 7.53127200  | 3.35769200  |
| C | 3.61760800   | 6.17216100  | 3.52567700  |
| C | 4.01798200   | 5.51526600  | 2.21755500  |
| C | 3.04300800   | 5.04481900  | 1.31789200  |
| C | 3.41370100   | 4.46136200  | 0.09999500  |
| C | 4.77013200   | 4.33190400  | -0.22932300 |
| C | 5.74877300   | 4.78618600  | 0.66114300  |
| C | 5.37242500   | 5.37723500  | 1.87424100  |
| H | 4.60212700   | 8.79096200  | 3.07986700  |
| H | 1.98725000   | 7.41572000  | 2.77160700  |
| H | 4.50535400   | 6.30642600  | 4.15828900  |
| H | 2.93547600   | 5.51931400  | 4.08969800  |
| H | 1.98671300   | 5.12879300  | 1.56638500  |
| H | 2.64511500   | 4.12028400  | -0.58780200 |
| H | 5.05927700   | 3.87595500  | -1.17084000 |
| H | 6.80102900   | 4.67950500  | 0.41646000  |
| H | 6.13790400   | 5.72364000  | 2.56412900  |
| C | 1.54803400   | 0.09975300  | 5.24013600  |
| C | 1.00321200   | 1.04528900  | 4.22318000  |
| N | 0.74992400   | 2.39886500  | 4.49504600  |
| C | 0.26560400   | 3.01074100  | 3.38295500  |
| N | 0.20072100   | 2.09310000  | 2.41443500  |
| C | 0.64956100   | 0.87254100  | 2.90638800  |
| H | 2.53574900   | 0.41293900  | 5.59931100  |
| H | 1.65727200   | -0.89556300 | 4.80316500  |
| H | -0.02218200  | 4.04805100  | 3.25008500  |
| H | 0.68332700   | -0.01177900 | 2.29465000  |
| H | -0.18104800  | 2.35517500  | 1.39222400  |
| C | -9.73711500  | 11.72504300 | -2.57428100 |
| C | -9.77482900  | 10.18400200 | -2.55613500 |
| C | -8.55330500  | 9.61891700  | -1.79037700 |
| C | -8.58757400  | 8.10092400  | -1.54556600 |
| C | -9.87389400  | 9.62901500  | -3.99082700 |
| H | -8.84679200  | 12.08563200 | -3.10743900 |
| H | -10.67960200 | 9.87340700  | -2.00819000 |
| H | -7.63935000  | 9.88447900  | -2.34686000 |
| H | -8.48453300  | 10.13476500 | -0.82071700 |
| H | -9.49588300  | 7.81463700  | -0.99960400 |
| H | -8.57747700  | 7.53906900  | -2.48683200 |

|   |              |             |             |
|---|--------------|-------------|-------------|
| H | -7.72269600  | 7.77707700  | -0.95516400 |
| H | -10.74403500 | 10.04648700 | -4.51122600 |
| H | -9.97259900  | 8.53828000  | -4.00341600 |
| H | -8.97942100  | 9.89465400  | -4.57101500 |
| C | 8.69012200   | 1.44429500  | -8.88323500 |
| C | 7.90759900   | 0.47645300  | -8.02178100 |
| C | 6.51199100   | 0.36625800  | -8.14447400 |
| C | 5.79150200   | -0.55068500 | -7.37003500 |
| C | 6.45376100   | -1.37771700 | -6.45255800 |
| C | 7.84494600   | -1.27255500 | -6.32060900 |
| C | 8.56202200   | -0.35453000 | -7.09526100 |
| H | 9.58097900   | 1.81368600  | -8.36362600 |
| H | 8.08191500   | 2.30927000  | -9.16904000 |
| H | 5.98825100   | 1.00325200  | -8.85258300 |
| H | 4.71334700   | -0.62041100 | -7.48438200 |
| H | 5.89471600   | -2.08964400 | -5.85213100 |
| H | 8.37107300   | -1.90667100 | -5.61286400 |
| H | 9.64068600   | -0.28031500 | -6.98350100 |
| C | -4.49881900  | 9.40238600  | -0.05333000 |
| C | -3.20555500  | 9.46789800  | -0.90924900 |
| C | -3.24892700  | 8.58355800  | -2.17021100 |
| C | -1.89343000  | 8.47236400  | -2.90067700 |
| N | -0.93966200  | 7.56817600  | -2.23887800 |
| C | -0.02450600  | 7.89377400  | -1.31936600 |
| N | 0.21063100   | 9.17204200  | -0.93654000 |
| N | 0.69626900   | 6.91204900  | -0.72619800 |
| C | -4.65735700  | 8.05996900  | 0.64282700  |
| O | -5.34600300  | 7.13348900  | 0.12170400  |
| H | -5.37555300  | 9.53697200  | -0.69358300 |
| H | -2.35107700  | 9.17871700  | -0.28550600 |
| H | -3.03998300  | 10.51359900 | -1.20779400 |
| H | -3.59084300  | 7.57390700  | -1.91500600 |
| H | -3.98620900  | 8.99599900  | -2.87287800 |
| H | -2.05254100  | 8.05599800  | -3.89964600 |
| H | -1.44715700  | 9.46628500  | -3.04921700 |
| H | -0.91164200  | 6.58382500  | -2.60314800 |
| H | -0.26833200  | 9.94212200  | -1.36892000 |
| H | 0.96199500   | 9.34816500  | -0.26949300 |
| H | 0.63759900   | 5.92831200  | -1.07195100 |
| H | 1.47767500   | 7.19066900  | -0.14139400 |
| N | -4.00099100  | 7.86827500  | 1.81920600  |
| C | -4.07628200  | 6.56813400  | 2.53428100  |
| C | -3.48089700  | 6.88088700  | 3.91753000  |
| C | -2.46387400  | 8.00376400  | 3.61989000  |
| C | -3.17690900  | 8.86030800  | 2.55505100  |
| H | -3.47702400  | 5.82010100  | 2.00292900  |
| H | -4.26015500  | 7.24168300  | 4.60001500  |
| H | -3.01452600  | 6.00097200  | 4.36854600  |
| H | -2.19141100  | 8.58806300  | 4.50350000  |
| H | -1.55423700  | 7.56263500  | 3.19639800  |
| H | -2.47285000  | 9.36550700  | 1.88901600  |
| H | -3.81715000  | 9.62240400  | 3.02045300  |
| C | -1.81893500  | 6.40539200  | -7.44236500 |
| C | -2.63469000  | 5.66657300  | -6.37110800 |
| H | -1.41201800  | 7.34784500  | -7.05493600 |
| H | -2.02235300  | 5.42589200  | -5.49439200 |
| H | -3.48623400  | 6.27243000  | -6.03397400 |
| H | -3.04080200  | 4.72673200  | -6.76623500 |
| C | 3.86020100   | -4.50339300 | -7.19894900 |
| C | 2.57163900   | -4.50798000 | -8.04785300 |
| C | 1.66368300   | -3.28963900 | -7.92819000 |
| C | 0.49794500   | -3.24361700 | -8.71725900 |
| C | -0.35785900  | -2.14050400 | -8.67785400 |
| C | -0.06457200  | -1.05406900 | -7.84177200 |
| C | 1.08480500   | -1.09085700 | -7.04723200 |
| C | 1.94378600   | -2.19873400 | -7.08818000 |
| C | 3.67751700   | -4.55172500 | -5.68661700 |
| O | 4.25840900   | -3.73225400 | -4.92321700 |
| H | 4.46138800   | -3.61755600 | -7.41749600 |
| H | 1.98355400   | -5.41309700 | -7.83364300 |
| H | 2.87601100   | -4.61054300 | -9.09885100 |
| H | 0.26666500   | -4.07803900 | -9.37471000 |
| H | -1.24553200  | -2.12338600 | -9.30261900 |
| H | -0.72126900  | -0.19034500 | -7.81590300 |
| H | 1.32280900   | -0.25560300 | -6.39517300 |

|   |              |              |             |    |              |             |             |
|---|--------------|--------------|-------------|----|--------------|-------------|-------------|
| H | 2.82457800   | -2.20363700  | -6.45601400 | N  | -7.41489200  | -0.95800300 | -5.71017000 |
| N | 2.88084500   | -5.54893200  | -5.20483800 | C  | -6.53296600  | -1.94703800 | -6.32595700 |
| C | 2.65198100   | -5.79053200  | -3.76888300 | H  | -8.03949400  | -1.27802500 | -4.97577000 |
| C | 1.13833700   | -5.85432900  | -3.43361100 | H  | -5.61783700  | -2.09373100 | -5.74075500 |
| C | 0.92383700   | -6.11071700  | -1.92987900 | C  | -4.00191300  | -0.40726500 | 1.58104100  |
| C | 0.41525200   | -4.56990600  | -3.87842300 | C  | -3.40140400  | -1.09835100 | 0.52677400  |
| C | 3.34742300   | -7.12717100  | -3.45713400 | C  | -2.69149100  | -2.35145500 | 0.65297300  |
| O | 2.87494600   | -8.18581600  | -3.94637900 | C  | -2.18769500  | -2.65082100 | -0.58476300 |
| H | 2.50791200   | -6.24774900  | -5.83446800 | C  | -2.60741900  | -1.59481500 | -1.47898500 |
| H | 3.10975000   | -4.95150800  | -3.24340800 | N  | -3.35085000  | -0.65586000 | -0.78086700 |
| O | 0.72750700   | -6.70954600  | -3.98836200 | C  | -2.36055800  | -1.56843700 | -2.84772500 |
| H | 1.34822600   | -7.06208600  | -1.59784800 | C  | -2.85998100  | -0.62657600 | -3.73941500 |
| H | -0.14785800  | -6.14102600  | -1.70000800 | C  | -2.79232400  | -0.73687900 | -5.18252000 |
| H | 1.37180800   | -5.31035300  | -1.32517900 | C  | -3.53511200  | 0.29038700  | -5.69776800 |
| H | -0.66151500  | -4.66560800  | -3.68954400 | C  | -4.01881700  | 1.06217900  | -4.57441800 |
| H | 0.55561500   | -4.36639400  | -4.94399800 | N  | -3.59998500  | 0.49143800  | -3.38781200 |
| H | 0.78558800   | -3.69952600  | -3.31973800 | C  | -4.73134400  | 2.25566600  | -4.67840000 |
| N | 4.49791200   | -7.12027500  | -2.71747100 | C  | -5.03729900  | 3.08371400  | -3.60574700 |
| C | 5.34476600   | -8.33760000  | -2.65356600 | C  | -5.57166100  | 4.42520200  | -3.70608700 |
| C | 6.77687900   | -7.76379300  | -2.60964900 | C  | -5.63659100  | 4.92935900  | -2.43633900 |
| C | 6.60721700   | -6.45887000  | -1.80189600 | C  | -5.18801900  | 3.88168200  | -1.54218300 |
| C | 5.23763100   | -5.90465700  | -2.25461500 | N  | -4.80579000  | 2.76833200  | -2.27355500 |
| C | 5.07881600   | -9.24607200  | -1.44609400 | C  | -5.26215700  | 3.95303100  | -0.15613400 |
| O | 5.82319700   | -10.23283400 | -1.22846300 | C  | -5.04182500  | 2.88625700  | 0.70858600  |
| H | 5.15357000   | -8.94336600  | -3.54387300 | C  | -5.31394200  | 2.89767100  | 2.13094600  |
| H | 7.47121900   | -8.47315800  | -2.15570300 | C  | -5.01809800  | 1.65291400  | 2.61244000  |
| H | 7.11775900   | -7.54568200  | -3.62801200 | C  | -4.53199900  | 0.87002500  | 1.49733400  |
| H | 6.59305300   | -6.68142700  | -0.72860700 | N  | -4.57732800  | 1.63592700  | 0.33279700  |
| H | 7.41138900   | -5.74005900  | -1.98158700 | Fe | -4.03625400  | 1.08778200  | -1.52857200 |
| H | 5.33843900   | -5.19021700  | -3.07824100 | H  | -3.99671400  | -0.88404900 | 2.55613200  |
| H | 4.70163800   | -5.41261200  | -1.43627500 | H  | -1.78181400  | -2.38691700 | -3.26339500 |
| N | 4.02727900   | -8.93682500  | -0.64899200 | H  | -5.03037600  | 2.56594700  | -5.67258200 |
| C | 3.66406800   | -9.77428300  | 0.47606000  | H  | -5.56580300  | 4.90788100  | 0.26129200  |
| C | 2.44079200   | -9.17521900  | 1.16342100  | O  | 0.49444300   | 4.29448000  | -1.59381200 |
| O | 1.94134900   | -8.08823000  | 0.77360600  | C  | -0.05286500  | 4.16730400  | -2.79338500 |
| H | 3.43369800   | -8.13640900  | -0.82609700 | O  | -0.70146500  | 5.12554900  | -3.35787300 |
| H | 3.45175900   | -10.79917100 | 0.14055800  | C  | 0.06057900   | 2.89853100  | -3.49886400 |
| N | 1.95218100   | -9.89045800  | 2.21121400  | C  | 0.80032100   | 1.71540500  | -2.97169500 |
| C | 0.78623500   | -9.47341000  | 3.00391600  | C  | 2.29650100   | 1.69359900  | -3.40991500 |
| C | -0.42814300  | -10.40652500 | 2.84514000  | C  | 3.05084700   | 0.46845000  | -2.86276100 |
| C | -1.02397800  | -10.50251500 | 1.42102800  | C  | 4.54128800   | 0.45909400  | -3.25330400 |
| C | -2.14668700  | -11.55912700 | 1.39129800  | C  | 5.32245400   | -0.77833700 | -2.76461800 |
| C | -1.53668500  | -9.14210200  | 0.90662600  | C  | 5.48109900   | -0.86952600 | -1.23445900 |
| H | 2.39665900   | -10.76670900 | 2.45124800  | C  | 6.34902500   | -2.06086700 | -0.79688700 |
| O | 0.54810900   | -8.45656000  | 2.68631900  | H  | -0.35488600  | 2.87632500  | -4.50262800 |
| H | -0.14928500  | -11.41586000 | 3.18449900  | H  | -2.07644900  | 2.21523600  | -2.20263300 |
| H | -1.20876500  | -10.05650800 | 3.53787200  | H  | 0.76223700   | 1.70717000  | -1.87632800 |
| H | -0.22497300  | -10.84103900 | 0.74347100  | H  | 0.32297000   | 0.79136600  | -3.32533800 |
| H | -2.54878000  | -11.67511000 | 0.37837400  | H  | 2.77793300   | 2.61609900  | -3.05797800 |
| H | -2.97625100  | -11.26618300 | 2.04872700  | H  | 2.35629600   | 1.70679500  | -4.50748500 |
| H | -1.78466200  | -12.53950300 | 1.72428500  | H  | 2.94923900   | 0.44865400  | -1.76789400 |
| H | -2.00066300  | -9.25760500  | -0.08005900 | H  | 2.57468700   | -0.45107100 | -3.23636000 |
| H | -0.72567100  | -8.41322300  | 0.80799500  | H  | 4.62352200   | 0.51427200  | -4.34777800 |
| H | -2.29756100  | -8.73251200  | 1.58566800  | H  | 5.02275300   | 1.36996300  | -2.86206200 |
| C | -8.08660600  | -1.74162300  | -0.78704300 | H  | 4.83605000   | -1.68937500 | -3.14294500 |
| C | -6.60110700  | -1.43132100  | -1.01517800 | H  | 6.32228800   | -0.75798600 | -3.22134500 |
| S | -6.37239100  | 0.32986200   | -1.67935100 | H  | 5.92809500   | 0.06479200  | -0.86135300 |
| C | -8.90057200  | -1.61462500  | -2.06588100 | H  | 4.49319300   | -0.94892500 | -0.75833600 |
| O | -8.59636500  | -2.23873500  | -3.11332000 | H  | 7.35705900   | -1.98973200 | -1.22396600 |
| H | -8.48777700  | -1.09399600  | 0.00053900  | H  | 5.91221700   | -3.00844600 | -1.13715500 |
| H | -6.04363700  | -1.51732000  | -0.07904500 | O  | -0.70208300  | 5.24919900  | 1.69977700  |
| H | -6.17167700  | -2.11540700  | -1.75081300 | H  | -0.95360400  | 4.45969300  | 1.14218200  |
| N | -9.96721800  | -0.75880000  | -2.01971600 | H  | -0.41069700  | 5.96862000  | 1.10269700  |
| C | -10.88896400 | -0.59644600  | -3.14243200 | O  | -0.73853900  | 2.93890800  | 0.24542700  |
| C | -10.35699600 | 0.18066400   | -4.35115100 | H  | -1.50125800  | 2.45313100  | -0.28142700 |
| O | -11.06898300 | 0.27536100   | -5.37366600 | H  | -0.13815300  | 3.39432000  | -0.43746100 |
| H | -10.14497100 | -0.24572200  | -1.16911500 | O  | -2.35653600  | 1.85666500  | -1.33591800 |
| H | -11.17706700 | -1.58141500  | -3.52367100 | H  | -6.25345400  | -1.59880100 | -7.32221300 |
| N | -9.09933700  | 0.70112500   | -4.25083600 | H  | -7.06111000  | -2.90030200 | -6.40447100 |
| C | -8.41192400  | 1.27288300   | -5.39886800 | H  | -11.79527600 | -0.10027300 | -2.78641700 |
| C | -7.36370300  | 0.35461000   | -6.03758300 | H  | -8.17664300  | -2.78046700 | -0.44002900 |
| O | -6.53448100  | 0.84418600   | -6.85257500 | H  | -5.10629500  | 1.28995200  | 3.62633300  |
| H | -8.59200700  | 0.62932600   | -3.37762500 | H  | -2.59403600  | -2.91705200 | 1.56839000  |
| H | -7.91277700  | 2.20495900   | -5.12237800 | H  | 0.90325100   | 2.84952600  | 5.38393500  |
| H | -9.16768500  | 1.50076200   | -6.15761400 | H  | 0.88627600   | 0.00961200  | 6.11004400  |

|                              |              |             |             |   |              |             |             |
|------------------------------|--------------|-------------|-------------|---|--------------|-------------|-------------|
| H                            | 6.44992400   | -2.10939400 | 0.29407500  | H | -7.81527300  | 9.68926000  | -1.92796000 |
| H                            | 2.62229700   | 7.92446100  | 4.34383100  | H | -8.94120200  | 7.71056800  | -0.80573000 |
| H                            | 4.90830900   | 10.59618100 | 1.68323400  | H | -8.46609300  | 6.68237100  | -2.16706800 |
| H                            | -4.49382400  | 10.21871200 | 0.67788000  | H | -7.22305400  | 7.41413700  | -1.14343300 |
| H                            | -5.11412800  | 6.22707700  | 2.56852300  | H | -10.98260100 | 8.40205100  | -4.58092000 |
| H                            | -2.42982000  | 6.64470600  | -8.32091800 | H | -10.17730400 | 7.15254400  | -3.62233700 |
| H                            | -0.97151100  | 5.79872200  | -7.78301700 | H | -9.30770300  | 7.95197400  | -4.94559000 |
| H                            | -10.61770000 | 12.13750800 | -3.08068600 | C | 6.54106700   | 4.20918300  | -5.46518900 |
| H                            | -9.70907800  | 12.13510600 | -1.55720100 | C | 6.02725900   | 2.85833300  | -5.01556800 |
| H                            | 4.46498700   | -5.37387900 | -7.49067200 | C | 4.91764400   | 2.26390800  | -5.64121600 |
| H                            | 1.08096900   | -9.43251200 | 4.06035500  | C | 4.46605800   | 0.99656100  | -5.25351300 |
| H                            | 4.49952800   | -9.84924600 | 1.18633400  | C | 5.11352400   | 0.29558300  | -4.22620600 |
| H                            | 9.03119700   | 0.96582200  | -9.81158600 | C | 6.21726300   | 0.88198800  | -3.59279500 |
| H                            | -2.26440400  | -1.51276800 | -5.71731400 | C | 6.66724800   | 2.14926500  | -3.98272500 |
| H                            | -3.77904800  | 0.50611500  | -6.72607100 | H | 6.96481600   | 4.77778000  | -4.62957600 |
| H                            | -5.83283900  | 4.91020600  | -4.63503400 | H | 5.74402200   | 4.81060100  | -5.91539300 |
| H                            | -5.96153800  | 5.90267900  | -2.10024400 | H | 4.41013000   | 2.79503800  | -6.44226600 |
| H                            | -5.70200400  | 3.74788500  | 2.67196100  | H | 3.60901000   | 0.55602400  | -5.75468400 |
| H                            | -1.59984300  | -3.50857700 | -0.87783800 | H | 4.76458500   | -0.69068600 | -3.93252400 |
|                              |              |             |             | H | 6.73087500   | 0.34970500  | -2.79755500 |
|                              |              |             |             | H | 7.53203900   | 2.58890200  | -3.49152400 |
| <b>4IM1<sub>HA,B,β</sub></b> |              |             |             | C | -4.15980500  | 9.65825700  | -1.13956700 |
| C                            | 4.70384200   | 10.24661100 | -0.03911400 | C | -2.87526100  | 9.70087100  | -2.01304700 |
| C                            | 5.80947200   | 9.49102100  | -0.82902600 | C | -2.86476600  | 8.63469400  | -3.12699300 |
| C                            | 5.32445600   | 8.62753300  | -2.01794200 | C | -1.49084700  | 8.43229500  | -3.80010400 |
| C                            | 4.60219700   | 9.46242000  | -3.09345200 | N | -0.58465300  | 7.57299600  | -3.02253000 |
| C                            | 6.52262900   | 7.87238000  | -2.62790400 | C | 0.31631700   | 7.96020600  | -2.11438300 |
| C                            | 3.70604100   | 9.31341100  | 0.61547100  | N | 0.58732500   | 9.26266700  | -1.85592300 |
| O                            | 2.60944400   | 9.00303600  | 0.05676600  | N | 0.98890700   | 7.02205200  | -1.40589700 |
| H                            | 4.14863100   | 10.90922700 | -0.70740900 | C | -4.13264900  | 8.48160400  | -0.17762500 |
| H                            | 6.51937600   | 10.24259100 | -1.20225100 | O | -4.61749200  | 7.35873200  | -0.50785100 |
| H                            | 6.36836000   | 8.85045500  | -0.13249500 | H | -5.03988400  | 9.53828200  | -1.77838200 |
| H                            | 4.61690900   | 7.87726900  | -1.63477800 | H | -2.00187600  | 9.56943500  | -1.36122500 |
| H                            | 4.33331700   | 8.83403700  | -3.95017900 | H | -2.78774600  | 10.69883400 | -2.46573600 |
| H                            | 3.67723200   | 9.90974100  | -2.71339700 | H | -3.19256400  | 7.66979900  | -2.72442400 |
| H                            | 5.24835200   | 10.26995200 | -3.46292300 | H | -3.59301200  | 8.91969400  | -3.89870000 |
| H                            | 6.19718000   | 7.22669700  | -3.45134700 | H | -1.62687900  | 7.92638500  | -4.76039900 |
| H                            | 7.01460000   | 7.23972100  | -1.88017700 | H | -1.01457700  | 9.39711900  | -4.02536100 |
| H                            | 7.26734900   | 8.57408800  | -3.02604600 | H | -0.60119100  | 6.55283300  | -3.26920900 |
| N                            | 4.05486600   | 8.80135300  | 1.82179700  | H | 0.14894200   | 9.99979800  | -2.37909400 |
| C                            | 3.23795200   | 7.84570600  | 2.57844000  | H | 1.32579900   | 9.48021500  | -1.18642400 |
| C                            | 3.96412600   | 6.50776000  | 2.83983700  | H | 0.90621500   | 6.01310900  | -1.65206500 |
| C                            | 4.36192300   | 5.75402100  | 1.58354100  | H | 1.76635100   | 7.33363800  | -0.83262700 |
| C                            | 3.38528300   | 5.26557400  | 0.69526400  | N | -3.52084900  | 8.65642300  | 1.02435500  |
| C                            | 3.75405200   | 4.57884000  | -0.46812800 | C | -3.40810300  | 7.54158600  | 2.00181000  |
| C                            | 5.10930600   | 4.35938500  | -0.75305300 | C | -2.99949600  | 8.24799500  | 3.30664200  |
| C                            | 6.08818300   | 4.83296100  | 0.12738800  | C | -2.19691100  | 9.47490300  | 2.81905400  |
| C                            | 5.71525300   | 5.52945500  | 1.28456000  | C | -2.95150300  | 9.92237900  | 1.55166700  |
| H                            | 4.94564000   | 9.07329800  | 2.21527500  | H | -2.64184600  | 6.82880100  | 1.67210800  |
| H                            | 2.32771300   | 7.68472000  | 1.99798500  | H | -3.88751100  | 8.57396800  | 3.86163900  |
| H                            | 4.85464900   | 6.69215500  | 3.45598200  | H | -2.41477500  | 7.59492100  | 3.96034200  |
| H                            | 3.28943100   | 5.89400800  | 3.45497500  | H | -2.13622500  | 10.27330800 | 3.56396500  |
| H                            | 2.32931700   | 5.40962300  | 0.91580000  | H | -1.17461500  | 9.17543800  | 2.55815500  |
| H                            | 2.98463800   | 4.22157300  | -1.14632100 | H | -2.29025600  | 10.39561700 | 0.82043000  |
| H                            | 5.39434700   | 3.81549300  | -1.64818100 | H | -3.75397700  | 10.63115400 | 1.79744900  |
| H                            | 7.13942900   | 4.65872500  | -0.08087200 | C | -1.51414800  | 6.29248400  | -7.96568900 |
| H                            | 6.48142600   | 5.89039200  | 1.96640700  | C | -2.35050500  | 5.58778600  | -6.88716100 |
| C                            | 2.12794000   | 0.98758900  | 5.22083200  | H | -1.05912500  | 7.21417000  | -7.58094300 |
| C                            | 1.54339200   | 1.82018900  | 4.13007900  | H | -1.73990900  | 5.31491500  | -6.01872400 |
| N                            | 1.20411800   | 3.17252600  | 4.29691100  | H | -3.17004600  | 6.23121400  | -6.53939500 |
| C                            | 0.70055400   | 3.66862800  | 3.13647400  | H | -2.80388600  | 4.66967100  | -7.28129900 |
| N                            | 0.70910200   | 2.67918100  | 2.23995700  | C | 4.32128400   | -3.15901900 | -6.24640300 |
| C                            | 1.22227500   | 1.52795900  | 2.82628500  | C | 3.49147200   | -3.40059200 | -7.52323300 |
| H                            | 3.09412500   | 1.38015700  | 5.56024400  | C | 2.13960300   | -2.70271200 | -7.60713200 |
| H                            | 2.29384800   | -0.03106100 | 4.86263500  | C | 1.34400100   | -2.91492500 | -8.74946300 |
| H                            | 0.34863800   | 4.67079600  | 2.91988000  | C | 0.10796000   | -2.28150700 | -8.89580100 |
| H                            | 1.31921400   | 0.60500900  | 2.28147100  | C | -0.36141600  | -1.41913400 | -7.89592700 |
| H                            | 0.31584600   | 2.82557100  | 1.20699100  | C | 0.41532300   | -1.20333500 | -6.75471100 |
| C                            | -9.41328700  | 10.55813000 | -3.89193400 | C | 1.65703600   | -1.83944600 | -6.60987400 |
| C                            | -9.51967500  | 9.20207900  | -3.16616900 | C | 3.74588600   | -3.68746900 | -4.93625700 |
| C                            | -8.16561800  | 8.82666400  | -2.51566800 | O | 3.74661100   | -2.98469500 | -3.88714600 |
| C                            | -8.20093900  | 7.58644300  | -1.60713100 | H | 4.50409000   | -2.09130200 | -6.10329700 |
| C                            | -10.02638900 | 8.11114500  | -4.13013200 | H | 3.34600300   | -4.47975000 | -7.68179900 |
| H                            | -8.68099700  | 10.50466600 | -4.70901100 | H | 4.10529700   | -3.07349200 | -8.37452500 |
| H                            | -10.25800100 | 9.30885000  | -2.35444600 | H | 1.70156800   | -3.58075300 | -9.53103100 |
| H                            | -7.42298500  | 8.67607700  | -3.31583900 |   |              |             |             |

|   |              |              |             |    |              |             |             |
|---|--------------|--------------|-------------|----|--------------|-------------|-------------|
| H | -0.48711700  | -2.45789300  | -9.78637100 | H  | -8.22664900  | 1.03804500  | -2.77041800 |
| H | -1.31991900  | -0.92253700  | -8.00870300 | H  | -7.33684600  | 2.11835900  | -4.77591900 |
| H | 0.05960300   | -0.54190500  | -5.97096800 | H  | -8.70774000  | 1.44091400  | -5.67285000 |
| H | 2.23583200   | -1.66327100  | -5.70989000 | N  | -7.34771800  | -1.13072800 | -4.72120400 |
| N | 3.28369200   | -4.96888000  | -4.95345100 | C  | -6.64457200  | -2.35014200 | -5.11122500 |
| C | 2.81027600   | -5.69106300  | -3.75949000 | H  | -8.00233700  | -1.19548400 | -3.94734200 |
| C | 1.35614400   | -6.20567600  | -3.93469200 | H  | -5.86627300  | -2.61351800 | -4.38592900 |
| C | 0.90010800   | -6.99135800  | -2.69107700 | C  | -3.65641200  | 0.02486500  | 2.22123400  |
| C | 0.39244400   | -5.04171700  | -4.23097900 | C  | -3.26332500  | -0.93756700 | 1.29088800  |
| C | 3.80172700   | -6.85191400  | -3.57395800 | C  | -2.81431000  | -2.26985700 | 1.62387900  |
| O | 3.86018500   | -7.74534600  | -4.45786800 | C  | -2.45041100  | -2.87351800 | 0.44992400  |
| H | 3.36722200   | -5.52772300  | -5.79300400 | C  | -2.69088700  | -1.91901100 | -0.60860300 |
| H | 2.84510100   | -4.97738300  | -2.93603300 | N  | -3.19978500  | -0.74375100 | -0.07682100 |
| H | 1.36403900   | -6.89372200  | -4.79185200 | C  | -2.47575000  | -2.16510000 | -1.96061600 |
| H | 1.50358600   | -7.88463800  | -2.50865300 | C  | -2.77957000  | -1.29182100 | -2.99674500 |
| H | -0.13681100  | -7.32425500  | -2.81208500 | C  | -2.74218800  | -1.63444000 | -4.40408700 |
| H | 0.94150300   | -6.36485000  | -1.78934200 | C  | -3.27071400  | -0.57447300 | -5.08778600 |
| H | -0.62057300  | -5.42709700  | -4.39794500 | C  | -3.59332100  | 0.43849900  | -4.10732300 |
| H | 0.69127600   | -4.47640600  | -5.11857900 | N  | -3.27969300  | -0.00787400 | -2.83692200 |
| H | 0.35601400   | -4.34293100  | -3.38379900 | C  | -4.10834500  | 1.69696800  | -4.40858900 |
| N | 4.64231300   | -6.84417000  | -2.49439200 | C  | -4.30421400  | 2.71299500  | -3.48314500 |
| C | 5.79449200   | -7.77922600  | -2.44622600 | C  | -4.68290200  | 4.07199700  | -3.80280100 |
| C | 6.88198900   | -6.95541600  | -1.72290700 | C  | -4.69139000  | 4.77490700  | -2.63001500 |
| C | 6.06894400   | -6.09796100  | -0.72856200 | C  | -4.35164600  | 3.84355000  | -1.57538700 |
| C | 4.78669400   | -5.73100800  | -1.50692100 | N  | -4.11071000  | 2.58727500  | -2.11320100 |
| C | 5.52855000   | -9.10053000  | -1.71288200 | C  | -4.36461000  | 4.16328900  | -0.22355700 |
| O | 6.46537700   | -9.91881200  | -1.54508000 | C  | -4.22719100  | 3.24561200  | 0.81095800  |
| H | 6.07164300   | -8.04662000  | -3.46970100 | C  | -4.41175200  | 3.54346500  | 2.21626900  |
| H | 7.61590100   | -7.60614300  | -1.24400500 | C  | -4.26354600  | 2.37110500  | 2.90262200  |
| H | 7.40228200   | -6.31660500  | -2.44566900 | C  | -3.96180000  | 1.34410600  | 1.92819800  |
| H | 5.81923000   | -6.68924900  | 0.16015800  | N  | -3.95738400  | 1.89601600  | 0.64974900  |
| H | 6.60800400   | -5.20661400  | -0.39550400 | Fe | -3.57794200  | 0.95493800  | -1.10249200 |
| H | 4.89279200   | -4.77440600  | -2.03045600 | H  | -3.67750900  | -0.27344900 | 3.26465900  |
| H | 3.90961100   | -5.67012800  | -0.85534500 | H  | -2.08467700  | -3.14027400 | -2.23215300 |
| N | 4.27087600   | -9.32638500  | -1.26346200 | H  | -4.35806100  | 1.89225800  | -5.44437700 |
| C | 3.91451800   | -10.56827900 | -0.60726800 | H  | -4.55478300  | 5.20371100  | 0.02304800  |
| C | 2.44875400   | -10.49872100 | -0.18738100 | O  | 0.78663500   | 4.32810500  | -2.07894100 |
| O | 1.76071100   | -9.46724900  | -0.40024700 | C  | 0.30042600   | 4.14971400  | -3.28274300 |
| H | 3.52368600   | -8.65545000  | -1.39180800 | O  | -0.41750500  | 5.01780500  | -3.87662600 |
| H | 4.07785400   | -11.42210100 | -1.28009900 | C  | 0.66953700   | 2.87093000  | -4.05182600 |
| N | 1.96289300   | -11.61138400 | 0.42294100  | C  | 0.63111900   | 1.58271700  | -3.28164800 |
| C | 0.57656700   | -11.73604500 | 0.89863000  | C  | 1.69731800   | 1.20990300  | -2.29546000 |
| C | -0.24556800  | -12.78092900 | 0.12215200  | C  | 1.62547900   | -0.24979400 | -1.80944700 |
| C | -0.44878100  | -12.49542000 | -1.38442900 | C  | 2.74592600   | -0.59208600 | -0.80975300 |
| C | -1.18406600  | -13.67750300 | -2.04786100 | C  | 2.76840100   | -2.06652600 | -0.35989500 |
| C | -1.20000300  | -11.17187700 | -1.63328900 | C  | 1.56151100   | -2.48665000 | 0.50059600  |
| H | 2.57480800   | -12.40797500 | 0.54139800  | C  | 1.63870100   | -3.94455500 | 0.98150100  |
| H | 0.13272100   | -10.74221700 | 0.81555700  | H  | 1.69779600   | 3.04527100  | -4.42073300 |
| H | 0.22876300   | -13.76752400 | 0.23861800  | H  | 0.01623900   | 2.83019600  | -4.92655300 |
| H | -1.23040500  | -12.85609300 | 0.60790500  | H  | -1.38361600  | 1.38378200  | -1.91758700 |
| H | 0.54573700   | -12.41389900 | -1.84980700 | H  | -0.06124500  | 0.81018100  | -3.61741700 |
| H | -1.29455100  | -13.51493300 | -3.12606300 | H  | 1.65669800   | 1.88489900  | -1.42521600 |
| H | -2.18953700  | -13.79916400 | -1.62336700 | H  | 2.68859400   | 1.39365800  | -2.74787300 |
| H | -0.64214800  | -14.62013000 | -1.90275500 | H  | 0.63980800   | -0.42278100 | -1.35494700 |
| H | -1.37849100  | -11.02962300 | -2.70578000 | H  | 1.70742500   | -0.92739500 | -2.67146200 |
| H | -0.63142300  | -10.30760900 | -1.27477100 | H  | 3.71171900   | -0.34996200 | -1.27463000 |
| H | -2.17781800  | -11.18071300 | -1.13219000 | H  | 2.66023100   | 0.06156600  | 0.07524100  |
| C | -8.05245000  | -0.83768300  | 0.22493500  | H  | 2.83118500   | -2.70247700 | -1.25467000 |
| C | -6.54520400  | -0.88468700  | -0.05889300 | H  | 3.68903400   | -2.25019200 | 0.21538900  |
| S | -6.01497600  | 0.58737700   | -1.12784700 | H  | 1.49648700   | -1.82048300 | 1.37721600  |
| C | -8.87429400  | -0.83382300  | -1.05549500 | H  | 0.62981400   | -2.33826500 | -0.06070400 |
| O | -8.70890800  | -1.69351600  | -1.95677700 | H  | 2.54680600   | -4.12029800 | 1.57247000  |
| H | -8.28914100  | 0.03441200   | 0.84477000  | H  | 1.65711800   | -4.63873300 | 0.13133300  |
| H | -5.97732400  | -0.85094400  | 0.87435800  | O  | -0.35925700  | 5.64222500  | 1.21687100  |
| H | -6.28076800  | -1.79384200  | -0.60405100 | H  | -0.60046800  | 4.79398000  | 0.74465500  |
| N | -9.78358500  | 0.18034600   | -1.18629900 | H  | -0.12156500  | 6.31430100  | 0.54625200  |
| C | -10.68924200 | 0.27185200   | -2.32978900 | O  | -0.34750100  | 3.21865200  | 0.01412800  |
| C | -10.06083900 | 0.70233500   | -3.65979100 | H  | -1.04950000  | 2.51441500  | -0.31919700 |
| O | -10.76750800 | 0.71083500   | -4.69035100 | H  | 0.16473300   | 3.57336400  | -0.78097100 |
| H | -9.85586400  | 0.87061900   | -0.45376300 | O  | -1.79028000  | 1.45489500  | -1.02751600 |
| H | -11.14181800 | -0.70726400  | -2.51637400 | H  | -6.17664500  | -2.18265700 | -6.08239000 |
| N | -8.73400300  | 1.02242900   | -3.64645600 | H  | -7.35500400  | -3.17851900 | -5.18392000 |
| C | -7.98499900  | 1.24381200   | -4.87451300 | H  | -11.49477300 | 0.96978500  | -2.08813800 |
| C | -7.10876300  | 0.06433900   | -5.31224200 | H  | -8.32920500  | -1.73501500 | 0.79622500  |
| O | -6.24023300  | 0.24820200   | -6.20791500 | H  | -4.34396400  | 2.20333400  | 3.96706100  |

|   |              |              |             |
|---|--------------|--------------|-------------|
| H | -2.77938500  | -2.67741400  | 2.62378700  |
| H | 1.31132300   | 3.69550400   | 5.15226900  |
| H | 1.46333900   | 0.92902500   | 6.09127800  |
| H | 0.77718400   | -4.20972000  | 1.60574500  |
| H | 2.95080900   | 8.30125400   | 3.53514300  |
| H | 5.18029900   | 10.87562800  | 0.72370400  |
| H | -4.27133800  | 10.60348600  | -0.59813000 |
| H | -4.36538500  | 7.01792300   | 2.07026400  |
| H | -2.12367700  | 6.56290900   | -8.83606600 |
| H | -0.69994600  | 5.64842700   | -8.31821200 |
| H | -10.37571600 | 10.85273200  | -4.32656000 |
| H | -9.09492700  | 11.35325200  | -3.20621600 |
| H | 5.30653700   | -3.62740200  | -6.38445500 |
| H | 0.59779600   | -12.00326200 | 1.96278700  |
| H | 4.55599700   | -10.73756700 | 0.26854900  |
| H | 7.33327500   | 4.10324000   | -6.21885200 |
| H | -2.38551900  | -2.57396300  | -4.79969000 |
| H | -3.47207600  | -0.47962100  | -6.14313600 |
| H | -4.88679400  | 4.42950900   | -4.80129200 |
| H | -4.91784600  | 5.81553000   | -2.45144200 |
| H | -4.64426700  | 4.52290900   | 2.60717600  |
| H | -2.06439300  | -3.87156400  | 0.30251500  |

**<sup>4</sup>TS<sub>2</sub>reb,B, $\alpha$**

|   |              |             |             |
|---|--------------|-------------|-------------|
| C | 4.44611100   | 10.02821700 | 0.92142200  |
| C | 5.54975700   | 9.26473300  | 0.13491400  |
| C | 5.07972200   | 8.49468600  | -1.12254200 |
| C | 4.44183100   | 9.42267900  | -2.17475700 |
| C | 6.27000200   | 7.72366500  | -1.72813300 |
| C | 3.38895200   | 9.10706600  | 1.49265200  |
| O | 2.33953900   | 8.80482400  | 0.84507500  |
| H | 3.94453700   | 10.74431400 | 0.26554500  |
| H | 6.30869800   | 10.00154900 | -0.16390800 |
| H | 6.04624600   | 8.55993400  | 0.81658800  |
| H | 4.32459900   | 7.75738300  | -0.81277100 |
| H | 4.17994900   | 8.85710900  | -3.07625800 |
| H | 3.52395400   | 9.89318400  | -1.80553100 |
| H | 5.13972900   | 10.21685900 | -2.47164600 |
| H | 5.95413500   | 7.14246900  | -2.60162600 |
| H | 6.70404400   | 7.02808400  | -1.00078000 |
| H | 7.05936600   | 8.41412700  | -2.05310400 |
| N | 3.63118000   | 8.59334200  | 2.72442300  |
| C | 2.74531100   | 7.64461300  | 3.40859700  |
| C | 3.42643500   | 6.29009600  | 3.70849600  |
| C | 3.91349000   | 5.55236400  | 2.47515900  |
| C | 3.00160900   | 5.03273500  | 1.53711600  |
| C | 3.45419900   | 4.37461600  | 0.38669100  |
| C | 4.82960100   | 4.21655700  | 0.16668900  |
| C | 5.74545900   | 4.71807000  | 1.09767200  |
| C | 5.28787200   | 5.38544200  | 2.24107700  |
| H | 4.48696000   | 8.85990200  | 3.19207600  |
| H | 1.87922400   | 7.50587700  | 2.75880300  |
| H | 4.26655000   | 6.45224300  | 4.39702000  |
| H | 2.69478800   | 5.67931600  | 4.25685900  |
| H | 1.93065600   | 5.13420400  | 1.70499500  |
| H | 2.73581100   | 3.99907700  | -0.33588600 |
| H | 5.18150900   | 3.70209200  | -0.72170200 |
| H | 6.81152200   | 4.58913400  | 0.93845800  |
| H | 6.00449800   | 5.76829600  | 2.96339200  |
| C | 0.33751100   | 0.15971300  | 5.63070900  |
| C | 0.04815800   | 1.09024300  | 4.50145700  |
| N | -0.07782200  | 2.47905000  | 4.66781100  |
| C | -0.33355400  | 3.06898200  | 3.47263500  |
| N | -0.37614000  | 2.10092400  | 2.55262000  |
| C | -0.14468100  | 0.87146200  | 3.15880900  |
| H | 1.29799800   | 0.38666300  | 6.10871700  |
| H | 0.38734300   | -0.86824400 | 5.26429600  |
| H | -0.47723000  | 4.12160800  | 3.24840300  |
| H | -0.13879100  | -0.04671800 | 2.59878900  |
| H | -0.57476900  | 2.32385100  | 1.50015100  |
| C | -9.84409600  | 10.48560000 | -3.28395100 |
| C | -10.06276200 | 9.43254900  | -2.17944800 |
| C | -8.70551600  | 8.89852300  | -1.65982300 |
| C | -8.79693700  | 7.98799900  | -0.42384700 |
| C | -10.97890800 | 8.30106400  | -2.68621500 |

|   |              |             |             |
|---|--------------|-------------|-------------|
| H | -9.33273100  | 10.04143000 | -4.14865900 |
| H | -10.56897500 | 9.92778800  | -1.33429000 |
| H | -8.20383200  | 8.35900700  | -2.47900300 |
| H | -8.06350500  | 9.76061800  | -1.42094000 |
| H | -9.30095500  | 8.50315400  | 0.40452700  |
| H | -9.36036700  | 7.07245100  | -0.63633000 |
| H | -7.79791900  | 7.69256000  | -0.08364500 |
| H | -11.93226100 | 8.70347800  | -3.04870100 |
| H | -11.20453800 | 7.57181900  | -1.90084900 |
| H | -10.50534000 | 7.76421600  | -3.51941800 |
| C | 8.51445400   | 1.33178900  | -8.97912900 |
| C | 7.74331600   | 0.36581300  | -8.10540500 |
| C | 6.34661900   | 0.25269100  | -8.21211500 |
| C | 5.63631200   | -0.66272100 | -7.42661200 |
| C | 6.31039900   | -1.48528000 | -6.51378600 |
| C | 7.70284700   | -1.37733500 | -6.39769900 |
| C | 8.40964700   | -0.46068700 | -7.18333700 |
| H | 7.90080900   | 2.19346700  | -9.26326500 |
| H | 8.84801300   | 0.84977200  | -9.90838300 |
| H | 5.81395700   | 0.88621100  | -8.91669400 |
| H | 4.55710300   | -0.73503100 | -7.52842000 |
| H | 5.75969800   | -2.19632100 | -5.90463100 |
| H | 8.23795100   | -2.00839800 | -5.69393100 |
| H | 9.48937600   | -0.38423900 | -7.08394200 |
| C | -4.37811000  | 9.59958000  | -0.51263200 |
| C | -3.04822200  | 9.56200100  | -1.31547200 |
| C | -3.04866100  | 8.52375400  | -2.45516700 |
| C | -1.66822900  | 8.30279200  | -3.11126100 |
| N | -0.77482900  | 7.42674800  | -2.33510400 |
| C | 0.11747500   | 7.79957900  | -1.41137100 |
| N | 0.36619700   | 9.09660200  | -1.11215500 |
| N | 0.79962600   | 6.85018700  | -0.72443000 |
| C | -4.50669400  | 8.39544500  | 0.40613600  |
| O | -5.10878500  | 7.34846200  | 0.02725300  |
| H | -5.22926000  | 9.57604000  | -1.19945300 |
| H | -2.22373500  | 9.35335700  | -0.62194900 |
| H | -2.86541700  | 10.56069800 | -1.73824000 |
| H | -3.42068400  | 7.55965500  | -2.08952400 |
| H | -3.74933800  | 8.85351300  | -3.23459300 |
| H | -1.80159900  | 7.80691100  | -4.07712200 |
| H | -1.17638500  | 9.26270700  | -3.32394800 |
| H | -0.79466600  | 6.41261600  | -2.59563200 |
| H | -0.09837200  | 9.84327100  | -1.59787500 |
| H | 1.09773900   | 9.30585700  | -0.43248700 |
| H | 0.78518200   | 5.85635600  | -1.04047800 |
| H | 1.55167500   | 7.16453000  | -0.11868700 |
| N | -3.90200600  | 8.45604900  | 1.62368200  |
| C | -3.92190300  | 7.29327400  | 2.54978700  |
| C | -3.50563700  | 7.90372700  | 3.89946100  |
| C | -2.57574400  | 9.06997300  | 3.49703900  |
| C | -3.23358900  | 9.63834700  | 2.22386300  |
| H | -3.20351700  | 6.53655300  | 2.20875300  |
| H | -4.38337900  | 8.28664500  | 4.43388700  |
| H | -3.01067500  | 7.17410000  | 4.54658100  |
| H | -2.47211400  | 9.82754800  | 4.27896400  |
| H | -1.57547900  | 8.68722700  | 3.26024000  |
| H | -2.49996100  | 10.07393000 | 1.53966500  |
| H | -3.97327300  | 10.41189300 | 2.47077900  |
| C | -1.64732700  | 6.37421100  | -7.20811900 |
| C | -2.48430700  | 5.46478700  | -6.29611600 |
| H | -1.34128300  | 7.29192600  | -6.68900000 |
| H | -1.92347800  | 5.16414600  | -5.40356100 |
| H | -3.40101500  | 5.96945500  | -5.96464200 |
| H | -2.78924400  | 4.55323100  | -6.82431700 |
| C | 3.72815200   | -4.63691400 | -7.19261000 |
| C | 2.41172300   | -4.62729300 | -7.99949200 |
| C | 1.54797700   | -3.37541800 | -7.89626600 |
| C | 0.41543700   | -3.27404400 | -8.72736700 |
| C | -0.40146000  | -2.14139100 | -8.70053000 |
| C | -0.10156800  | -1.07970600 | -7.83551400 |
| C | 1.01498000   | -1.17135700 | -6.99962900 |
| C | 1.83506400   | -2.30882200 | -7.02758800 |
| C | 3.59254000   | -4.68619100 | -5.67538200 |
| O | 4.16925200   | -3.84771500 | -4.92946200 |
| H | 4.33013300   | -3.75657600 | -7.43025700 |

|   |              |              |             |    |             |             |             |
|---|--------------|--------------|-------------|----|-------------|-------------|-------------|
| H | 1.80312100   | -5.50454000  | -7.73194100 | C  | -8.59819200 | 1.86725700  | -5.22282200 |
| H | 2.67605400   | -4.77615100  | -9.05537500 | C  | -7.76664900 | 1.08044900  | -6.24250500 |
| H | 0.18061400   | -0.48791300  | -9.40883300 | C  | -7.03389900 | 1.70124800  | -7.06240100 |
| H | -1.26188400  | -2.08116100  | -9.35993200 | H  | -8.26458600 | 0.87480100  | -3.36499200 |
| H | -0.72571400  | -0.19181000  | -7.82116900 | H  | -8.02461200 | 2.75242900  | -4.93956500 |
| H | 1.25904200   | -0.35490000  | -6.32623900 | H  | -9.52100000 | 2.19822400  | -5.71178300 |
| H | 2.69348600   | -2.35380800  | -6.36689500 | N  | -7.89794600 | -0.26587800 | -6.23316400 |
| N | 2.83845600   | -5.70446000  | -5.16970000 | C  | -7.23229700 | -1.11012700 | -7.22323800 |
| C | 2.65251800   | -5.94491100  | -3.72764400 | H  | -8.42709400 | -0.73066500 | -5.49973500 |
| C | 1.14918600   | -6.03348200  | -3.35284400 | H  | -6.18815600 | -1.30762300 | -6.95145600 |
| C | 0.97763200   | -6.30029400  | -1.84558800 | C  | -3.31656500 | -0.18290100 | 1.25715100  |
| C | 0.39717700   | -4.75736600  | -3.77319500 | C  | -2.87681700 | -0.83331000 | 0.11351100  |
| C | 3.37881900   | -7.26731300  | -3.42820400 | C  | -2.15236800 | -2.08179400 | 0.09804800  |
| O | 2.91947100   | -8.33437500  | -3.91146600 | C  | -1.83289600 | -2.35222900 | -1.20575000 |
| H | 2.47251300   | -6.41869200  | -5.78617000 | C  | -2.38596600 | -1.29044500 | -2.01221400 |
| H | 3.10833400   | -5.09566500  | -3.21720900 | N  | -3.01274900 | -0.36013200 | -1.18714100 |
| H | 0.73631200   | -6.89181800  | -3.90127300 | C  | -2.37900800 | -1.26844600 | -3.39951400 |
| H | 1.42282200   | -7.24837100  | -1.53225600 | C  | -3.06021900 | -0.33878600 | -4.17196000 |
| H | -0.08659200  | -6.34450000  | -1.58670400 | C  | -3.20645500 | -0.40329800 | -5.61087700 |
| H | 1.43213700   | -5.49905400  | -1.24718600 | C  | -4.01149200 | 0.63817000  | -5.98440100 |
| H | -0.67282000  | -4.86587000  | -3.55586000 | C  | -4.33533900 | 1.37605000  | -4.78352600 |
| H | 0.50603400   | -4.54869700  | -4.84166600 | N  | -3.76132900 | 0.75282500  | -3.68286000 |
| H | 0.77270000   | -3.88400700  | -3.22238700 | C  | -5.02703900 | 2.57731000  | -4.76533500 |
| N | 4.53788600   | -7.23859300  | -2.70263100 | C  | -5.19168700 | 3.36403300  | -3.63526800 |
| C | 5.40305400   | -8.44304500  | -2.64076600 | C  | -5.76613700 | 4.68842400  | -3.62737200 |
| C | 6.82715400   | -7.84781300  | -2.61774300 | C  | -5.68358800 | 5.16469300  | -2.34599500 |
| C | 6.64760800   | -6.54076200  | -1.81562600 | C  | -5.09306900 | 4.12044500  | -1.54214400 |
| C | 5.26507300   | -6.00918000  | -2.25594000 | N  | -4.77819400 | 3.03137300  | -2.34721300 |
| C | 5.16536700   | -9.34554800  | -1.42290000 | C  | -4.95931600 | 4.17581300  | -0.16271700 |
| O | 5.91616100   | -10.32990300 | -1.21733400 | C  | -4.55107600 | 3.10811700  | 0.62120100  |
| H | 5.21041100   | -9.05820000  | -3.52408800 | C  | -4.58911800 | 3.08596000  | 2.06423200  |
| H | 7.53786800   | -8.54379200  | -2.16840000 | C  | -4.18896500 | 1.83944200  | 2.46373500  |
| H | 7.15220300   | -7.63085500  | -3.64153200 | C  | -3.86679400 | 1.09050600  | 1.27178000  |
| H | 6.64826100   | -6.75705000  | -0.74102200 | N  | -4.10384800 | 1.87753700  | 0.15282800  |
| H | 7.43922200   | -5.81144900  | -2.00828400 | Fe | -3.91836500 | 1.32019400  | -1.76417800 |
| H | 5.34638600   | -5.29879500  | -3.08527100 | H  | -3.17669300 | -0.68396400 | 2.20890100  |
| H | 4.73163100   | -5.51920500  | -1.43477300 | H  | -1.86063800 | -2.06925200 | -3.91488200 |
| N | 4.13452400   | -9.03091000  | -0.60107800 | H  | -5.44536800 | 2.92230500  | -5.70386600 |
| C | 3.80552100   | -9.85672800  | 0.54304100  | H  | -5.23121900 | 5.10859800  | 0.31758500  |
| C | 2.61884600   | -9.23710600  | 1.27483600  | O  | 0.71124100  | 4.19159100  | -1.50670900 |
| O | 2.10621100   | -8.15583700  | 0.88619800  | C  | -0.00024400 | 3.94583600  | -2.59013900 |
| H | 3.53743800   | -8.23065600  | -0.76710000 | C  | -0.71945300 | 4.84185000  | -3.17300500 |
| H | 3.56503200   | -10.88072000 | 0.22375300  | C  | -0.05300000 | 2.57678300  | -3.10643400 |
| N | 2.17632600   | -9.92899800  | 2.35812100  | C  | 0.77782200  | 1.46152100  | -2.58319800 |
| C | 1.04850300   | -9.49208800  | 3.19426400  | C  | 2.20207500  | 1.42926000  | -3.21977200 |
| C | -0.17525000  | -10.42226600 | 3.10681800  | C  | 3.04425700  | 0.25640900  | -2.68490000 |
| C | -0.83536300  | -10.53985200 | 1.71293100  | C  | 4.48566400  | 0.25252900  | -3.22903200 |
| C | -1.96686700  | -11.58674800 | 1.75484600  | C  | 5.33365500  | -0.95228700 | -2.77170300 |
| C | -1.36015800  | -9.18501700  | 1.19597600  | C  | 5.61709200  | -0.99723500 | -1.25746200 |
| H | 2.62937200   | -10.80137600 | 2.59625700  | C  | 6.54677400  | -2.15614400 | -0.86171700 |
| H | 0.80025900   | -8.47991600  | 2.86938400  | H  | -0.58924400 | 2.44805800  | -4.04052500 |
| H | 0.11470900   | -11.42700300 | 3.45035000  | H  | -2.37312200 | 3.06354000  | -2.42278600 |
| H | -0.92272900  | -10.05706300 | 3.82775000  | H  | 0.89279800  | 1.55525400  | -1.49798100 |
| H | -0.07049500  | -10.89825500 | 1.00682700  | H  | 0.27509500  | 0.50855800  | -2.78603900 |
| H | -2.41352300  | -11.72114000 | 0.76306900  | H  | 2.70613000  | 2.38062500  | -3.00367500 |
| H | -2.76446000  | -11.27148300 | 2.44079800  | H  | 2.11711100  | 1.35644600  | -4.31320100 |
| H | -1.59895700  | -12.56295200 | 2.09375300  | H  | 3.05961400  | 0.30428300  | -1.58640500 |
| H | -1.87347900  | -9.31614300  | 0.23598800  | H  | 2.55548200  | -0.69379300 | -2.94893000 |
| H | -0.54846000  | -8.46658500  | 1.04241700  | H  | 4.45497600  | 0.26057900  | -4.32748500 |
| H | -2.08291300  | -8.75393200  | 1.90281300  | H  | 4.98728200  | 1.18628000  | -2.92822700 |
| C | -7.27882000  | -2.26693400  | -1.99235900 | H  | 4.84008900  | -1.88351600 | -3.08632200 |
| C | -5.99473400  | -1.47683300  | -2.31956900 | H  | 6.29255900  | -0.92312700 | -3.30841800 |
| S | -6.12134300  | 0.30156600   | -1.64890600 | H  | 6.06997100  | -0.04324200 | -0.94611000 |
| C | -8.48450700  | -1.74539300  | -2.75515900 | H  | 4.67350100  | -1.08576800 | -0.70022300 |
| O | -8.68153700  | -2.04369200  | -3.96100600 | H  | 7.51360100  | -2.07604600 | -1.37402700 |
| H | -7.45546700  | -2.25859300  | -0.91101600 | H  | 6.10584800  | -3.12271800 | -1.13742800 |
| H | -5.13603700  | -1.95275900  | -1.84413500 | O  | -0.81080100 | 5.30320600  | 1.62696700  |
| H | -5.83524300  | -1.43534900  | -3.39925500 | H  | -1.06931700 | 4.53596500  | 1.04863100  |
| N | -9.30928600  | -0.88691400  | -2.08402100 | H  | -0.44376900 | 6.01225300  | 1.05951900  |
| C | -10.50366600 | -0.31632300  | -2.70410100 | O  | -0.83408200 | 2.95142300  | 0.20258100  |
| C | -10.25726700 | 0.64432600   | -3.87281900 | H  | -1.49488700 | 2.60794500  | -0.49869600 |
| O | -11.21131000 | 0.95321700   | -4.61880400 | H  | -0.06189600 | 3.34215100  | -0.31651800 |
| H | -9.07426000  | -0.62593500  | -1.13736200 | O  | -2.17048300 | 2.24499600  | -1.91664300 |
| H | -11.13350200 | -1.11472400  | -3.10760100 | H  | -7.24386400 | -0.61154300 | -8.19532800 |
| N | -8.98273100  | 1.10331100   | -4.04422800 | H  | -7.76545100 | -2.06039300 | -7.29036500 |

|   |              |             |             |
|---|--------------|-------------|-------------|
| H | -11.07848000 | 0.20614800  | -1.93445000 |
| H | -7.12957000  | -3.30704100 | -2.30439300 |
| H | -4.11240000  | 1.45103400  | 3.46921200  |
| H | -1.92312400  | -2.67013300 | 0.97506600  |
| H | 0.00893600   | 2.96697000  | 5.54608300  |
| H | -0.44061700  | 0.19989900  | 6.40237400  |
| H | 6.73908000   | -2.17036500 | 0.21772700  |
| H | 2.39563200   | 8.09552600  | 4.34625700  |
| H | 4.91849400   | 10.60063500 | 1.72966100  |
| H | -4.43862200  | 10.53330600 | 0.05695800  |
| H | -4.92019100  | 6.84843600  | 2.55836500  |
| H | -2.20746600  | 6.67264900  | -8.10211400 |
| H | -0.73393900  | 5.86810500  | -7.54226300 |
| H | -10.79830500 | 10.89477900 | -3.63608300 |
| H | -9.23120600  | 11.32091100 | -2.92292400 |
| H | 4.31272200   | -5.51418100 | -7.50433100 |
| H | 1.39047000   | -9.43373100 | 4.23551600  |
| H | 4.66876900   | -9.93900200 | 1.21816500  |
| H | 9.40921600   | 1.70648400  | -8.47009000 |
| H | -2.75287700  | -1.15885900 | -6.23554400 |
| H | -4.38374400  | 0.89995200  | -6.96322800 |
| H | -6.15996200  | 5.18330300  | -4.50294900 |
| H | -5.98079900  | 6.12308700  | -1.94757600 |
| H | -4.91039100  | 3.91577300  | 2.67644400  |
| H | -1.29181000  | -3.20006100 | -1.59936100 |

#### 4TS2<sub>DS,B,β</sub>

|   |             |             |             |
|---|-------------|-------------|-------------|
| C | 5.13268100  | 10.08269300 | 0.14208600  |
| C | 6.18502900  | 9.24458900  | -0.63810800 |
| C | 5.66813700  | 8.50658200  | -1.89643500 |
| C | 5.11876000  | 9.47744600  | -2.95986600 |
| C | 6.79873500  | 7.63827900  | -2.48493500 |
| C | 4.02886000  | 9.23127900  | 0.73350600  |
| O | 2.95239400  | 8.99044900  | 0.10476100  |
| H | 4.66936700  | 10.81817300 | -0.52037900 |
| H | 6.99402600  | 9.92659300  | -0.93575600 |
| H | 6.62910700  | 8.50855900  | 0.04679200  |
| H | 4.85334000  | 7.83321100  | -1.59271400 |
| H | 4.81712600  | 8.93006900  | -3.86017900 |
| H | 4.24085000  | 10.02609400 | -2.60102600 |
| H | 5.88375800  | 10.20782900 | -3.25476100 |
| H | 6.44559800  | 7.08281600  | -3.36126600 |
| H | 7.16323900  | 6.91141600  | -1.75006800 |
| H | 7.64682700  | 8.25929900  | -2.80209500 |
| N | 4.26103500  | 8.70719400  | 1.96263000  |
| C | 3.33497600  | 7.81008600  | 2.66253000  |
| C | 3.94785400  | 6.42173800  | 2.95221500  |
| C | 4.36172500  | 5.64948600  | 1.71268400  |
| C | 3.39974300  | 5.19656200  | 0.79036600  |
| C | 3.78371700  | 4.48959900  | -0.35566700 |
| C | 5.13819100  | 4.21478400  | -0.59099800 |
| C | 6.10228500  | 4.65555200  | 0.32217700  |
| C | 5.71517600  | 5.37153000  | 1.46276900  |
| H | 5.13859200  | 8.92396200  | 2.41543700  |
| H | 2.45169100  | 7.71803300  | 2.02776500  |
| H | 4.81256500  | 6.53935300  | 3.61912000  |
| H | 3.19765000  | 5.85388600  | 3.52201800  |
| H | 2.34301300  | 5.38677500  | 0.96921900  |
| H | 3.02754800  | 4.15884900  | -1.06088600 |
| H | 5.43370500  | 3.65455700  | -1.47239600 |
| H | 7.15229400  | 4.43802900  | 0.15279300  |
| H | 6.46959100  | 5.70372100  | 2.17172300  |
| C | 1.22893000  | 0.92406800  | 5.16732900  |
| C | 0.81968600  | 1.81506700  | 4.04335300  |
| N | 0.66277200  | 3.20358600  | 4.18521700  |
| C | 0.29563200  | 3.75175700  | 2.99896900  |
| N | 0.21390800  | 2.75901100  | 2.10957600  |
| C | 0.52890900  | 1.55331200  | 2.72619200  |
| H | 2.21805200  | 1.19104100  | 5.55844700  |
| H | 1.28062300  | -0.11104700 | 4.82183900  |
| H | 0.10045100  | 4.79035100  | 2.75843200  |
| H | 0.52403800  | 0.61921800  | 2.19221100  |
| H | -0.08612900 | 2.93919800  | 1.07154100  |
| C | -9.38999900 | 11.22906200 | -3.29260800 |
| C | -9.45438400 | 9.94255400  | -2.44548500 |

|   |              |             |             |
|---|--------------|-------------|-------------|
| C | -8.02894400  | 9.43968000  | -2.10977800 |
| C | -7.97219500  | 8.27535500  | -1.10669300 |
| C | -10.29894800 | 8.86817000  | -3.15874400 |
| H | -8.89823500  | 11.03573900 | -4.25555200 |
| H | -9.95105700  | 10.18839500 | -1.49228200 |
| H | -7.53128400  | 9.14406600  | -3.04730900 |
| H | -7.45036200  | 10.28557200 | -1.70739700 |
| H | -8.47509600  | 8.54353700  | -0.16823200 |
| H | -8.46141400  | 7.37704000  | -1.49951900 |
| H | -6.93474600  | 8.01068700  | -0.87212100 |
| H | -11.30199000 | 9.24799900  | -3.38630100 |
| H | -10.41651000 | 7.96625500  | -2.54869200 |
| H | -9.82999100  | 8.57546200  | -4.10800500 |
| C | 7.98649400   | 3.38799700  | -3.97454000 |
| C | 7.00063100   | 2.24228300  | -3.88425700 |
| C | 5.71812700   | 2.34864400  | -4.45295900 |
| C | 4.82211200   | 1.27387100  | -4.41071100 |
| C | 5.18612400   | 0.06833000  | -3.79422000 |
| C | 6.45810700   | -0.04293700 | -3.21815900 |
| C | 7.35333300   | 1.03217300  | -3.26138900 |
| H | 8.76246500   | 3.31023100  | -3.20562900 |
| H | 7.49003100   | 4.35849000  | -3.85887800 |
| H | 5.42603100   | 3.27544300  | -4.94031500 |
| H | 3.83984000   | 1.37642000  | -4.86349900 |
| H | 4.49436200   | -0.76915400 | -3.76501700 |
| H | 6.75410200   | -0.97011500 | -2.73642100 |
| H | 8.33925700   | 0.93167300  | -2.81512100 |
| C | -3.67433500  | 9.97953000  | -1.60152300 |
| C | -2.32986800  | 9.95290200  | -2.38098700 |
| C | -2.26373200  | 8.83310500  | -3.43939700 |
| C | -0.86481900  | 8.62707000  | -4.06441400 |
| N | 0.01113100   | 7.74141000  | -3.28028700 |
| C | 0.82379300   | 8.08473300  | -2.27408800 |
| N | 1.09546200   | 9.37310400  | -1.95586100 |
| N | 1.39704400   | 7.11146500  | -1.52975600 |
| C | -3.73748000  | 8.87471400  | -0.55916000 |
| O | -4.21776800  | 7.73702500  | -0.84127600 |
| H | -4.50782300  | 9.82325400  | -2.29279200 |
| H | -1.50632700  | 9.84322400  | -1.66348500 |
| H | -2.19145400  | 10.92377000 | -2.87787700 |
| H | -2.59690400  | 7.88340400  | -3.00508300 |
| H | -2.96980600  | 9.07278800  | -4.24627100 |
| H | -0.97027500  | 8.14190700  | -5.03870000 |
| H | -0.37489200  | 9.59307000  | -4.25486900 |
| H | 0.05465500   | 6.74390900  | -3.59239000 |
| H | 0.76066300   | 10.12940500 | -2.52677300 |
| H | 1.76857600   | 9.55498700  | -1.21111800 |
| H | 1.24895000   | 6.11148700  | -1.76896600 |
| H | 2.13461800   | 7.37572300  | -0.88479100 |
| N | -3.21124200  | 9.12891800  | 0.66921200  |
| C | -3.19857100  | 8.08763100  | 1.73041300  |
| C | -2.86997200  | 8.88002200  | 3.00876800  |
| C | -2.01653500  | 10.06256600 | 2.49792700  |
| C | -2.66758500  | 10.42471900 | 1.14887000  |
| H | -2.43189700  | 7.33505100  | 1.50520000  |
| H | -3.78983400  | 9.25276500  | 3.47511600  |
| H | -2.34382300  | 8.26963200  | 3.74822300  |
| H | -2.00198000  | 10.91105900 | 3.18768900  |
| H | -0.98075800  | 9.73934900  | 2.33752300  |
| H | -1.94695200  | 10.84086900 | 0.43930100  |
| H | -3.47750100  | 11.15465600 | 1.28267400  |
| C | -2.93077800  | 4.37807100  | -7.31514600 |
| C | -2.54623600  | 5.60334100  | -6.47201100 |
| H | -2.14331400  | 4.12923900  | -8.03644000 |
| H | -1.61815700  | 5.42796900  | -5.91533300 |
| H | -2.40012300  | 6.48552100  | -7.10852200 |
| H | -3.33322700  | 5.84244900  | -5.74554000 |
| C | 2.29003300   | -2.45254200 | -6.08421800 |
| C | 2.69372300   | -3.24279100 | -7.36586900 |
| C | 1.63157100   | -4.17835000 | -7.92416500 |
| C | 1.76386000   | -5.57693000 | -7.83729700 |
| C | 0.77503400   | -6.42223400 | -8.36065000 |
| C | -0.35473300  | -5.88351800 | -8.98365800 |
| C | -0.49506100  | -4.49230200 | -9.08021500 |
| C | 0.48828800   | -3.64996100 | -8.55403800 |

|   |              |              |             |    |              |             |             |
|---|--------------|--------------|-------------|----|--------------|-------------|-------------|
| C | 2.41600500   | -3.21090000  | -4.76842800 | H  | -9.36121100  | 0.32482000  | 0.24388100  |
| O | 2.98270100   | -2.68673600  | -3.76700600 | H  | -11.56251800 | -0.44101100 | -1.47572300 |
| H | 1.25807300   | -2.08985500  | -6.19076200 | N  | -8.27398000  | 1.21557900  | -3.01128800 |
| H | 3.61667800   | -3.80100800  | -7.16982100 | C  | -8.89648400  | 1.62310800  | -4.35636400 |
| H | 2.94194900   | -2.49874000  | -8.13348900 | C  | -8.24847000  | 0.51630000  | -5.19524700 |
| H | 2.63326100   | -6.01302900  | -7.35347600 | O  | -7.53993400  | 0.82984100  | -6.19326700 |
| H | 0.89591800   | -7.49753900  | -8.28050300 | H  | -8.53319600  | 1.05319300  | -2.33585000 |
| H | -1.11651000  | -6.53790800  | -9.39487600 | H  | -8.20097700  | 2.46458600  | -4.32416600 |
| H | -1.36485900  | -4.06668700  | -9.57103300 | H  | -9.80875500  | 1.95055000  | -4.86685900 |
| H | 0.37705800   | -2.57210900  | -8.64489700 | N  | -8.51244100  | -0.76047200 | -4.83411000 |
| N | 1.88016300   | -4.46131700  | -4.72649100 | C  | -8.03670200  | -1.90137100 | -5.61300500 |
| C | 2.01557300   | -5.36869500  | -3.57448800 | H  | -9.00721500  | -0.95919000 | -3.96776100 |
| C | 0.68541100   | -6.11932900  | -3.30059800 | H  | -7.08043500  | -2.28314800 | -5.23377600 |
| C | 0.83352500   | -7.08748200  | -2.11268500 | C  | -3.29832400  | 0.36150200  | 1.97315400  |
| C | -0.46586100  | -5.12608300  | -3.05385400 | C  | -3.08571100  | -0.58828600 | 0.98290500  |
| C | 3.14945500   | -6.35114000  | -3.92662800 | C  | -2.56678500  | -1.92086200 | 1.20331900  |
| O | 2.99777800   | -7.13474500  | -4.90046000 | C  | -2.36748000  | -2.48951700 | -0.02498900 |
| H | 1.50941400   | -4.86966300  | -5.57725900 | C  | -2.79470400  | -1.52947900 | -1.02006200 |
| H | 2.26769600   | -4.74710800  | -2.71469900 | N  | -3.22609400  | -0.37457700 | -0.38134700 |
| H | 0.46271900   | -6.71069800  | -4.20010000 | N  | -2.88015100  | -1.78742900 | -2.38231300 |
| H | 1.57412900   | -7.87033700  | -2.29555500 | C  | -3.49682100  | -0.95732800 | -3.30841500 |
| H | -0.11922600  | -7.58931600  | -1.91047500 | C  | -3.81572000  | -1.31486700 | -4.67444300 |
| H | 1.12463100   | -6.55353300  | -1.19788300 | C  | -4.56363000  | -0.29597300 | -5.20061100 |
| H | -1.40514400  | -5.66961900  | -2.89859100 | C  | -4.67330400  | 0.72278700  | -4.18005200 |
| H | -0.59972400  | -4.44262800  | -3.89881000 | N  | -4.02292000  | 0.29544800  | -3.03106400 |
| H | -0.26904800  | -4.52238200  | -2.15702300 | C  | -5.24164400  | 1.97567800  | -4.36324100 |
| N | 4.31310000   | -6.30840300  | -3.20948500 | C  | -5.16863400  | 3.00856400  | -3.43764400 |
| C | 5.50787000   | -7.04315600  | -3.69559600 | C  | -5.54377700  | 4.38346600  | -3.69223000 |
| C | 6.67605600   | -6.12155200  | -3.28203900 | C  | -5.18217900  | 5.11943200  | -2.59731100 |
| C | 6.18406100   | -5.50656400  | -1.95368400 | C  | -4.62456900  | 4.19868600  | -1.62998500 |
| C | 4.67083100   | -5.28924800  | -2.17313700 | N  | -4.60686900  | 2.91740500  | -2.16923400 |
| C | 5.68728200   | -8.44992700  | -3.11009500 | C  | -4.27854100  | 4.53996600  | -0.32951200 |
| O | 6.70086400   | -9.12535900  | -3.41250000 | C  | -3.94896800  | 3.62375400  | 0.66055700  |
| H | 5.42579200   | -7.16902700  | -4.77844800 | C  | -3.82807900  | 3.92730900  | 2.06702400  |
| H | 7.60721700   | -6.68333100  | -3.18761500 | C  | -3.63766500  | 2.74209400  | 2.72761100  |
| H | 6.81571300   | -5.34155100  | -4.03914800 | C  | -3.59564400  | 1.69650500  | 1.73198500  |
| H | 6.35438800   | -6.20835000  | -1.12890200 | N  | -3.79203200  | 2.25490700  | 0.47821500  |
| H | 6.69297700   | -4.57097100  | -1.70473800 | Fe | -3.94567900  | 1.25807400  | -1.26314600 |
| H | 4.45398000   | -4.28527500  | -2.55240600 | H  | -3.15536400  | 0.05427700  | 3.00329100  |
| H | 4.09497600   | -5.44826800  | -1.25576600 | H  | -2.51730100  | -2.74765700 | -2.73161600 |
| N | 4.73080800   | -8.90521700  | -2.26534900 | H  | -5.74468800  | 2.15629100  | -5.30642800 |
| C | 4.79645400   | -10.23707300 | -1.69797400 | H  | -4.33946500  | 5.59241500  | -0.07396600 |
| C | 3.59625600   | -10.43871600 | -0.77673700 | O  | 0.87708500   | 4.42705800  | -2.13917300 |
| O | 2.75799700   | -9.51894500  | -0.59189000 | C  | 0.51079100   | 4.23118200  | -3.38839300 |
| H | 3.92100900   | -8.35028600  | -2.01779900 | O  | 0.27270700   | 5.19845900  | -4.19997800 |
| H | 4.79845400   | -10.99586500 | -2.49321800 | C  | 0.30747300   | 2.86834800  | -3.90597900 |
| N | 3.51298400   | -11.65880200 | -0.18486500 | C  | 0.36452300   | 1.63825200  | -3.16781400 |
| C | 2.43072500   | -12.04274400 | 0.73474200  | C  | 1.46784900   | 1.38086100  | -2.11204800 |
| C | 1.48451300   | -13.11039500 | 0.15493800  | C  | 1.47729400   | -0.07226900 | -1.60600700 |
| C | 0.68736400   | -12.69141300 | -1.10253400 | C  | 2.63555000   | -0.32425100 | -0.61871000 |
| C | -0.10013500  | -13.89817400 | -1.65183400 | C  | 2.75086500   | -1.78335400 | -0.13240900 |
| C | -0.25318300  | -11.50041300 | -0.82875700 | C  | 1.63947900   | -2.22410100 | 0.83886600  |
| H | 4.21791500   | -12.35208300 | -0.39783700 | C  | 1.80028900   | -3.67590000 | 1.31887300  |
| H | 1.89080800   | -11.12517100 | 0.97610800  | H  | -0.08868900  | 2.85292700  | -4.91872300 |
| H | 2.06705600   | -14.01560100 | -0.07520200 | H  | -2.29985800  | 2.58288500  | -2.46771300 |
| H | 0.77764700   | -13.39517100 | 0.94902000  | H  | -0.69657700  | 1.61682700  | -2.54325800 |
| H | 1.41054100   | -12.38220800 | -1.87310500 | H  | 0.25384900   | 0.77470700  | -3.83610900 |
| H | -0.63608600  | -13.63152500 | -2.56995300 | H  | 1.35663900   | 2.06613900  | -1.26930100 |
| H | -0.84230100  | -14.24542600 | -0.92063100 | H  | 2.44178200   | 1.60485400  | -2.56927700 |
| H | 0.56418000   | -14.74036400 | -1.88131300 | H  | 0.50946000   | -0.30363900 | -1.13771900 |
| H | -0.84418500  | -11.26685100 | -1.72249000 | H  | 1.59452100   | -0.75988100 | -2.45510800 |
| H | 0.30377000   | -10.59850500 | -0.55493200 | H  | 3.57512100   | -0.04458700 | -1.11456800 |
| H | -0.95619100  | -11.73926300 | -0.01885100 | H  | 2.53640300   | 0.34738000  | 0.25067200  |
| C | -7.80348800  | -1.67947000  | -0.17810700 | H  | 2.75884300   | -2.44368200 | -1.01131800 |
| C | -6.45534200  | -1.24626100  | -0.78802900 | H  | 3.72210400   | -1.91717200 | 0.36744800  |
| S | -6.29898600  | 0.65177000   | -0.80377100 | H  | 1.64537000   | -1.55217400 | 1.71409800  |
| C | -8.98069300  | -1.23834400  | -1.03008000 | H  | 0.65596000   | -2.10518000 | 0.36469700  |
| O | -9.26673000  | -1.81340900  | -2.11183300 | H  | 2.76201500   | -3.82065500 | 1.82694600  |
| H | -7.88740100  | -1.29804600  | 0.84561500  | H  | 1.76537100   | -4.37428200 | 0.47292200  |
| H | -5.63454400  | -1.65493800  | -0.19667000 | O  | -0.36364300  | 5.83573900  | 1.03048600  |
| H | -6.37503200  | -1.60944400  | -1.81564000 | H  | -0.70808700  | 5.04383000  | 0.53296900  |
| N | -9.67986300  | -0.15050000  | -0.58770500 | H  | 0.00207400   | 6.47623700  | 0.38811800  |
| C | -10.84599900 | 0.36700800   | -1.29918900 | O  | -0.57069500  | 3.42686600  | -0.22380300 |
| C | -10.57659900 | 0.98772000   | -2.67399300 | H  | -1.25470700  | 2.83385600  | -0.69943600 |
| O | -11.54269000 | 1.23957700   | -3.42696200 | H  | 0.08101200   | 3.76324200  | -0.92615800 |





|   |              |              |             |    |              |             |             |
|---|--------------|--------------|-------------|----|--------------|-------------|-------------|
| C | -0.24120500  | -1.75908600  | -7.38807200 | C  | -11.13802800 | 0.55494600  | -2.51273100 |
| C | 0.61501500   | -1.42252800  | -6.33567600 | C  | -10.54823500 | 0.97700400  | -3.86309100 |
| C | 1.90205700   | -1.97453100  | -6.26657500 | O  | -11.28320100 | 0.97830700  | -4.87297900 |
| C | 4.05708800   | -3.87981100  | -4.68934700 | H  | -10.25287500 | 1.17094900  | -0.66693800 |
| O | 4.08297800   | -3.25187300  | -3.59349500 | H  | -11.59281100 | -0.42677800 | -2.67876300 |
| H | 4.74007800   | -2.19278700  | -5.76924200 | N  | -9.22206500  | 1.29693900  | -3.88893900 |
| H | 3.69736100   | -4.52931600  | -7.49956500 | C  | -8.50626700  | 1.50858100  | -5.13792300 |
| H | 4.32465000   | -3.01234300  | -8.08122900 | C  | -7.64371700  | 0.32473500  | -5.59113800 |
| H | 1.80603700   | -3.90423500  | -9.06543500 | O  | -6.79910800  | 0.50224600  | -6.51060200 |
| H | -0.46388600  | -2.93027500  | -9.19066100 | H  | -8.69136200  | 1.31852000  | -3.02689600 |
| H | -1.23449700  | -1.32470500  | -7.44386500 | H  | -7.85549700  | 2.38404800  | -5.06267300 |
| H | 0.29497700   | -0.72656600  | -5.56687200 | H  | -9.24943900  | 1.69941800  | -5.91797000 |
| H | 2.54357500   | -1.70634700  | -5.43414300 | N  | -7.86822000  | -0.86538200 | -4.98581000 |
| N | 3.60667200   | -5.16177600  | -4.78250000 | C  | -7.18503300  | -2.09130600 | -5.39040500 |
| C | 3.16263600   | -5.96632500  | -3.63037400 | H  | -8.49878000  | -0.92195100 | -4.19174700 |
| C | 1.73146700   | -6.52984600  | -3.84048000 | H  | -6.41798900  | -2.38063000 | -4.66384600 |
| C | 1.30215000   | -7.39205700  | -2.63861100 | C  | -4.02625900  | 0.42949900  | 1.86852100  |
| C | 0.72138800   | -5.39455900  | -4.08829800 | C  | -3.60475600  | -0.53174300 | 0.94861300  |
| C | 4.19954100   | -7.09510800  | -3.50014300 | C  | -3.09603900  | -1.84005900 | 1.29318900  |
| O | 4.27189700   | -7.96284100  | -4.40823200 | C  | -2.71599700  | -2.44059700 | 0.12283700  |
| H | 3.66669000   | -5.65732400  | -5.66244700 | C  | -3.01166900  | -1.51142400 | -0.94466000 |
| H | 3.16780600   | -5.29716100  | -2.76968400 | N  | -3.55946400  | -0.35113500 | -0.42065500 |
| H | 1.77324000   | -7.17625200  | -4.72859800 | C  | -2.83043500  | -1.77542900 | -2.29840200 |
| H | 1.95080400   | -8.25908900  | -2.48684300 | C  | -3.21096100  | -0.94001500 | -3.34090200 |
| H | 0.28565000   | -7.77282400  | -2.78881000 | C  | -3.22888200  | -1.31948000 | -4.73915000 |
| H | 1.29836100   | -6.80342800  | -1.71123700 | C  | -3.82136000  | -0.29474600 | -5.42467100 |
| H | -0.27381400  | -5.81281200  | -4.27942000 | C  | -4.12531900  | 0.73576600  | -4.45673600 |
| H | 0.99969900   | -4.77509800  | -4.94572000 | N  | -3.74550700  | 0.33041700  | -3.19151300 |
| H | 0.64978800   | -4.73997100  | -3.20920800 | C  | -4.66152900  | 1.98404200  | -4.76857500 |
| N | 5.06309900   | -7.08373100  | -2.43770900 | C  | -4.80668900  | 3.02596800  | -3.86197700 |
| C | 6.24774000   | -7.97756700  | -2.43582100 | C  | -5.16097300  | 4.38824800  | -4.19827000 |
| C | 7.32657200   | -7.12895900  | -1.72929700 | C  | -5.09983700  | 5.11841100  | -3.04328000 |
| C | 6.51239800   | -6.31890200  | -0.69721300 | C  | -4.75220400  | 4.19873900  | -1.97983400 |
| C | 5.19323200   | -5.98920600  | -1.42824500 | N  | -4.56215400  | 2.92698400  | -2.49805000 |
| C | 6.04720900   | -9.31701500  | -1.71396200 | C  | -4.73466700  | 4.53561100  | -0.63134700 |
| O | 7.02010000   | -10.09572400 | -1.56235200 | C  | -4.61320200  | 3.62784200  | 0.41461700  |
| H | 6.50411400   | -8.21935000  | -3.47101600 | C  | -4.78707100  | 3.94627400  | 1.81645400  |
| H | 8.09554700   | -7.76156100  | -1.28241600 | C  | -4.64970100  | 2.78133100  | 2.51838300  |
| H | 7.80404200   | -6.46051100  | -2.45507900 | C  | -4.35873800  | 1.73851100  | 1.55846300  |
| H | 6.31415000   | -6.93292800  | 0.18905200  | N  | -4.36290700  | 2.27205200  | 0.27110400  |
| H | 7.02712000   | -5.41257200  | -0.36614200 | Fe | -4.00698800  | 1.31663200  | -1.46755000 |
| H | 5.24197200   | -5.01697800  | -1.93046500 | H  | -4.03436800  | 0.14575700  | 2.91614100  |
| H | 4.33590100   | -5.98228000  | -0.74816800 | H  | -2.41164900  | -2.74031200 | -2.56428400 |
| N | 4.80359900   | -9.60304200  | -1.25837000 | H  | -4.95564900  | 2.15113000  | -5.79776800 |
| C | 4.50573800   | -10.86622400 | -0.61290800 | H  | -4.88312800  | 5.58474600  | -0.39590000 |
| C | 3.03556900   | -10.87434100 | -0.20154200 | O  | 0.66948300   | 4.36371800  | -2.07215000 |
| O | 2.30023900   | -9.87326000  | -0.39952900 | C  | 0.27599500   | 4.11512200  | -3.27889700 |
| H | 4.02677900   | -8.96439600  | -1.37530500 | O  | -0.15662200  | 4.91794400  | -4.14433200 |
| H | 4.71837200   | -11.70595600 | -1.28970900 | C  | 0.78094000   | 2.02759600  | -4.06677100 |
| N | 2.60017200   | -12.01955700 | 0.38728700  | C  | 0.63014600   | 1.06324700  | -3.10421100 |
| C | 1.21932000   | -12.21707700 | 0.85469800  | C  | 1.64020500   | 0.77159000  | -2.02771200 |
| C | 0.44720200   | -13.27953000 | 0.05102900  | C  | 1.77593700   | -0.72794800 | -1.68548300 |
| C | 0.23023600   | -12.96636200 | -1.44779700 | C  | 2.75848500   | -0.97968400 | -0.52732800 |
| C | -0.44657100  | -14.16619000 | -2.14088900 | C  | 2.89950400   | -2.46020100 | -0.12113400 |
| C | -0.58391800  | -11.67506000 | -1.66488000 | C  | 1.65275500   | -3.05103000 | 0.56492900  |
| H | 3.24830000   | -12.78853400 | 0.49441900  | C  | 1.84943300   | -4.50516100 | 1.02116800  |
| H | 0.73198600   | -11.24226200 | 0.79296000  | H  | 1.76317600   | 2.45234100  | -4.26172500 |
| H | 0.96821700   | -14.24499700 | 0.14238800  | H  | 0.05415400   | 2.15101600  | -4.86305400 |
| H | -0.53274500  | -13.41420500 | 0.53373900  | H  | -1.90279200  | 1.95499000  | -2.36384500 |
| H | 1.21957700   | -12.82493800 | -1.90980300 | H  | -0.31902100  | 0.53266900  | -3.02212800 |
| H | -0.56616500  | -13.98220800 | -3.21463700 | H  | 1.34153100   | 1.30578100  | -1.10759300 |
| H | -1.44434700  | -14.34784400 | -1.71961500 | H  | 2.62062900   | 1.17722100  | -2.31377200 |
| H | 0.14134900   | -15.08428400 | -2.01938700 | H  | 0.78076100   | -1.12159900 | -1.43258200 |
| H | -0.77128900  | -11.51673500 | -2.73357500 | H  | 2.12012400   | -1.28348400 | -2.56834400 |
| H | -0.05607900  | -10.79327800 | -1.28746300 | H  | 3.74544000   | -0.59464200 | -0.81950300 |
| H | -1.55919600  | -11.74158500 | -1.16297400 | H  | 2.44698200   | -0.38888600 | 0.35183300  |
| C | -8.42291900  | -0.51941700  | -0.02556200 | H  | 3.15039600   | -3.04685700 | -1.01649900 |
| C | -6.92309300  | -0.55454500  | -0.34864000 | H  | 3.75378600   | -2.56188200 | 0.56582300  |
| S | -6.43431700  | 0.91772500   | -1.43763400 | H  | 1.39527900   | -2.42919900 | 1.43821700  |
| C | -9.28060300  | -0.53322000  | -1.28254300 | H  | 0.78942200   | -2.99460200 | -0.11197000 |
| O | -9.13637700  | -1.40054300  | -2.18018900 | H  | 2.69509900   | -4.58900800 | 1.71586500  |
| H | -8.65071000  | 0.35513800   | 0.59397000  | H  | 2.05472900   | -5.16359200 | 0.16871600  |
| H | -6.33288200  | -0.51207400  | 0.57034700  | O  | -0.52371500  | 5.59018400  | 1.05629600  |
| H | -6.66449700  | -1.46424000  | -0.89538600 | H  | -0.76207200  | 4.74049000  | 0.58383500  |
| N | -10.19867500 | 0.47532700   | -1.39581300 | H  | -0.25530900  | 6.25399300  | 0.39205600  |

|   |              |              |             |   |              |             |             |
|---|--------------|--------------|-------------|---|--------------|-------------|-------------|
| O | -0.55906500  | 3.13970700   | -0.10667300 | H | 0.97742300   | 2.55274300  | 7.70814700  |
| H | -1.33797600  | 2.59063200   | -0.55220500 | H | 0.30649000   | 6.18211700  | 3.69845200  |
| H | 0.04056400   | 3.48457700   | -0.84062300 | H | 0.29444700   | 2.14828400  | 4.99038800  |
| O | -2.22950200  | 1.85537100   | -1.44845100 | H | -0.07727700  | 3.81297500  | 2.96315300  |
| H | -6.70804600  | -1.91635400  | -6.35590700 | C | -10.68018400 | 6.45325500  | 1.14016500  |
| H | -7.90948500  | -2.90606700  | -5.48243100 | C | -10.35399900 | 7.29775500  | -0.10788100 |
| H | -11.93863600 | 1.25261800   | -2.25357000 | C | -8.83495500  | 7.26600500  | -0.40473300 |
| H | -8.67563000  | -1.41498100  | 0.55951700  | C | -8.41417400  | 7.92232800  | -1.72940400 |
| H | -4.72423900  | 2.63063300   | 3.58582800  | C | -10.88873200 | 8.73380800  | 0.05638000  |
| H | -3.03575600  | -2.23472600  | 2.29705600  | H | -10.18991400 | 6.87158600  | 2.03065900  |
| H | 1.06461500   | 3.63561200   | 5.02297800  | H | -10.86730200 | 6.83982600  | -0.96896200 |
| H | 1.10660700   | 0.89294500   | 6.05038400  | H | -8.30417600  | 7.75199400  | 0.43132700  |
| H | 0.95962300   | -4.89472400  | 1.52985600  | H | -8.50685600  | 6.21594700  | -0.41284600 |
| H | 2.78515800   | 8.50648200   | 3.29095100  | H | -8.94043900  | 7.46723400  | -2.57812400 |
| H | 5.29576600   | 10.88327000  | 0.55564100  | H | -8.63580300  | 8.99622300  | -1.74233000 |
| H | -3.97182000  | 10.87785600  | -1.25048600 | H | -7.33787100  | 7.79996400  | -1.89598900 |
| H | -4.44195700  | 7.43444300   | 1.55803600  | H | -11.96594700 | 8.72895100  | 0.26157200  |
| H | -2.31032500  | 6.27864900   | -8.96560200 | H | -10.72540100 | 9.33713200  | -0.84304000 |
| H | -0.73419100  | 5.58189000   | -8.56144600 | H | -10.39104500 | 9.23734400  | 0.89680700  |
| H | -11.57559600 | 11.66675300  | -1.47756100 | C | 7.10928300   | 3.05639600  | -8.02240700 |
| H | -9.98053500  | 12.01588900  | -0.78480400 | C | 6.51742700   | 1.88505600  | -7.26723000 |
| H | 5.59734200   | -3.67533100  | -6.14674100 | C | 5.13081400   | 1.65641500  | -7.26545000 |
| H | 1.24935600   | -12.50809600 | 1.91236800  | C | 4.58416000   | 0.55599400  | -6.59589800 |
| H | 5.14780400   | -11.00841900 | 0.26725600  | C | 5.41416500   | -0.34129400 | -5.91020500 |
| H | 7.98042600   | 3.79670700   | -5.34099000 | C | 6.79773000   | -0.12005100 | -5.90279100 |
| H | -2.85925000  | -2.25749200  | -5.12628100 | C | 7.34185800   | 0.98235000  | -6.57220800 |
| H | -4.07133800  | -0.23076000  | -6.47196300 | H | 8.04621300   | 3.39520900  | -7.56693300 |
| H | -5.39792100  | 4.72814500   | -5.19562000 | H | 6.41847700   | 3.90634000  | -8.05001400 |
| H | -5.27659000  | 6.17169500   | -2.88287100 | H | 4.47670300   | 2.34500200  | -7.79420900 |
| H | -5.00461100  | 4.93383600   | 2.19556300  | H | 3.50952900   | 0.39790000  | -6.61033100 |
| H | -2.28906300  | -3.42299200  | -0.01663000 | H | 4.98371400   | -1.19748500 | -5.39802400 |
|   |              |              |             | H | 7.45342500   | -0.80672700 | -5.37506700 |
|   |              |              |             | H | 8.41660200   | 1.14497700  | -6.55931200 |
|   |              |              |             | C | -3.70060500  | 9.45236200  | -2.09068100 |
|   |              |              |             | C | -2.29717700  | 9.16224200  | -2.68857600 |
|   |              |              |             | C | -2.27044800  | 7.93402500  | -3.61737500 |
|   |              |              |             | C | -0.85760700  | 7.52700700  | -4.08111300 |
|   |              |              |             | N | -0.05814200  | 6.92053400  | -3.00523700 |
|   |              |              |             | C | 0.83313700   | 7.53639500  | -2.22081900 |
|   |              |              |             | N | 1.20736800   | 8.82404900  | -2.40481800 |
|   |              |              |             | N | 1.38334400   | 6.86065900  | -1.18424600 |
|   |              |              |             | C | -4.12855900  | 8.41126900  | -1.06761800 |
|   |              |              |             | O | -4.77785300  | 7.38268000  | -1.41912000 |
|   |              |              |             | H | -4.44830800  | 9.43694200  | -2.88955200 |
|   |              |              |             | H | -1.57690000  | 9.02688900  | -1.87077400 |
|   |              |              |             | H | -1.97294700  | 10.05020900 | -3.25046300 |
|   |              |              |             | H | -2.72895500  | 7.07478500  | -3.11524300 |
|   |              |              |             | H | -2.88058200  | 8.13950500  | -4.50760300 |
|   |              |              |             | H | -0.93594400  | 6.77158900  | -4.86890200 |
|   |              |              |             | H | -0.32653700  | 8.37962500  | -4.52456800 |
|   |              |              |             | H | -0.19730500  | 5.89352000  | -2.86659100 |
|   |              |              |             | H | 0.85673800   | 9.36686400  | -3.17386700 |
|   |              |              |             | H | 1.93521200   | 9.20658800  | -1.80076600 |
|   |              |              |             | H | 1.17673000   | 5.85213300  | -1.04868900 |
|   |              |              |             | H | 2.16749100   | 7.28979500  | -0.70248200 |
|   |              |              |             | N | -3.76696400  | 8.59778800  | 0.23034000  |
|   |              |              |             | C | -4.15532700  | 7.61675100  | 1.27479700  |
|   |              |              |             | C | -3.77232600  | 8.31567400  | 2.59180900  |
|   |              |              |             | C | -2.58972400  | 9.22479900  | 2.18878300  |
|   |              |              |             | C | -2.99192600  | 9.73287200  | 0.79038300  |
|   |              |              |             | H | -3.60202600  | 6.68094800  | 1.12727400  |
|   |              |              |             | H | -4.61085600  | 8.91882600  | 2.96060300  |
|   |              |              |             | H | -3.50582700  | 7.59928100  | 3.37391700  |
|   |              |              |             | H | -2.41949600  | 10.04607500 | 2.89095400  |
|   |              |              |             | H | -1.67486900  | 8.62462200  | 2.11989000  |
|   |              |              |             | H | -2.12514200  | 9.96607900  | 0.16621100  |
|   |              |              |             | H | -3.61962400  | 10.63227200 | 0.85733800  |
|   |              |              |             | C | -0.43333400  | 3.28752300  | -7.65836400 |
|   |              |              |             | C | -1.52524200  | 3.62053500  | -6.63065400 |
|   |              |              |             | H | 0.43380100   | 3.95190400  | -7.55560700 |
|   |              |              |             | H | -1.14191700  | 3.54615100  | -5.60448900 |
|   |              |              |             | H | -1.89808900  | 4.64477000  | -6.77322000 |
|   |              |              |             | H | -2.37824200  | 2.93819800  | -6.73114600 |
|   |              |              |             | C | 3.25977000   | -3.48766600 | -7.15701000 |
|   |              |              |             | C | 1.99868800   | -3.59004800 | -8.03830100 |

#### <sup>4</sup>P<sub>OH,B,α</sub>

|   |            |             |             |
|---|------------|-------------|-------------|
| C | 5.31520300 | 10.08109600 | -0.83617700 |
| C | 6.28770800 | 9.02811700  | -1.43929700 |
| C | 5.66100800 | 7.99873800  | -2.40973400 |
| C | 5.05773200 | 8.66584300  | -3.66176100 |
| C | 6.72217600 | 6.95425000  | -2.81068900 |
| C | 4.26039000 | 9.46589800  | 0.05941100  |
| O | 3.14321200 | 9.06582400  | -0.39234400 |
| H | 4.80092300 | 10.62055200 | -1.63579300 |
| H | 7.07872200 | 9.57777600  | -1.96896700 |
| H | 6.77755800 | 8.48795700  | -0.61701900 |
| H | 4.85465600 | 7.47047200  | -1.87995600 |
| H | 4.67286400 | 7.90694000  | -4.35232400 |
| H | 4.22626900 | 9.33436500  | -3.41281800 |
| H | 5.81735100 | 9.24936900  | -4.19852000 |
| H | 6.29129800 | 6.19481600  | -3.47255400 |
| H | 7.12730900 | 6.44129600  | -1.93074100 |
| H | 7.55701100 | 7.42777100  | -3.34389400 |
| N | 4.58009300 | 9.33805800  | 1.37164400  |
| C | 3.70663600 | 8.72482200  | 2.37797000  |
| C | 4.32360200 | 7.46353000  | 3.02395800  |
| C | 4.60927800 | 6.33969100  | 2.04495800  |
| C | 3.55538600 | 5.64295500  | 1.42468800  |
| C | 3.81638700 | 4.61766300  | 0.50808200  |
| C | 5.13961400 | 4.26918100  | 0.20437100  |
| C | 6.19549000 | 4.94999100  | 0.81997500  |
| C | 5.92964600 | 5.98060000  | 1.73104100  |
| H | 5.48766100 | 9.66484500  | 1.67423000  |
| H | 2.77057000 | 8.48104600  | 1.87200100  |
| H | 5.24729600 | 7.74068700  | 3.54954700  |
| H | 3.62063900 | 7.12324400  | 3.79811100  |
| H | 2.52416800 | 5.89899200  | 1.66091800  |
| H | 2.98856700 | 4.09981200  | 0.03370300  |
| H | 5.34300100 | 3.47065800  | -0.50166800 |
| H | 7.22254600 | 4.67813100  | 0.59745000  |
| H | 6.75490200 | 6.49912800  | 2.21245500  |
| C | 1.03053800 | 3.63554600  | 7.57423000  |
| C | 0.71967500 | 3.98983400  | 6.15923400  |
| N | 0.70835000 | 5.31132300  | 5.68504700  |
| C | 0.39469700 | 5.33030600  | 4.36535700  |
| N | 0.20255500 | 4.06274600  | 3.98465200  |
| C | 0.39738800 | 3.21594300  | 5.07073700  |
| H | 2.03908800 | 3.95556800  | 7.86183400  |

|   |             |              |             |    |              |             |             |
|---|-------------|--------------|-------------|----|--------------|-------------|-------------|
| C | 0.86145100  | -2.62575400  | -7.72452400 | H  | -7.02994900  | -2.07281700 | -1.47779200 |
| C | -0.29890400 | -2.67580600  | -8.52218200 | H  | -6.43956000  | -1.65179000 | -3.10472700 |
| C | -1.36229100 | -1.79819600  | -8.30403800 | N  | -9.63114300  | -0.11184400 | -4.25026700 |
| C | -1.29512700 | -0.84285900  | -7.27823000 | C  | -9.93558400  | 0.67041000  | -5.44594200 |
| C | -0.14860100 | -0.78925900  | -6.47926800 | C  | -8.73392400  | 1.31663400  | -6.14462200 |
| C | 0.92104800  | -1.67153800  | -6.69650500 | O  | -8.86072700  | 1.73176800  | -7.31763800 |
| C | 3.10650400  | -3.85601000  | -5.68574200 | H  | -9.92395900  | 0.23374200  | -3.34735200 |
| O | 3.55802200  | -3.11450800  | -4.76892100 | H  | -10.40778900 | 0.03496700  | -6.20065400 |
| H | 3.66470400  | -2.47321100  | -7.18779100 | N  | -7.56666600  | 1.39224600  | -5.43933100 |
| H | 1.60821600  | -4.61886500  | -8.02305100 | C  | -6.32682700  | 1.81538700  | -6.07368200 |
| H | 2.31730500  | -3.42575600  | -9.07732500 | C  | -5.36133300  | 0.67198100  | -6.39971400 |
| H | -0.36090200 | -3.40653000  | -9.32525600 | O  | -4.13950900  | 0.93024700  | -6.61535000 |
| H | -2.24346900 | -1.85040800  | -8.93614300 | H  | -7.53531400  | 1.11609600  | -4.46003800 |
| H | -2.12683200 | -0.16416100  | -7.11093900 | H  | -5.79413100  | 2.52792000  | -5.44036300 |
| H | -0.08157300 | -0.05482900  | -5.68227700 | H  | -6.59075100  | 2.31749700  | -7.01089400 |
| H | 1.79270000  | -1.61055800  | -6.05394000 | N  | -5.88004200  | -0.57040000 | -6.46452500 |
| N | 2.49710200  | -5.04532200  | -5.41523200 | C  | -5.07857200  | -1.73572100 | -6.83046200 |
| C | 2.34539800  | -5.59232700  | -4.05586900 | H  | -6.85932600  | -0.73589000 | -6.23826600 |
| C | 0.87454000  | -5.98688300  | -3.75876800 | H  | -4.17430000  | -1.79551800 | -6.21821700 |
| C | 0.74178500  | -6.57143700  | -2.33969300 | C  | -6.97058900  | 0.54295300  | 2.31393900  |
| C | -0.06600300 | -4.78288800  | -3.94838600 | C  | -6.26362200  | -0.57811200 | 1.90801200  |
| C | 3.27725300  | -6.81480000  | -3.99328100 | C  | -6.27401700  | -1.85105500 | 2.58866300  |
| O | 3.00803000  | -7.82117900  | -4.69848000 | C  | -5.36119300  | -2.65413900 | 1.96203500  |
| H | 2.22537500  | -5.65998000  | -6.17153400 | C  | -4.80388700  | -1.89606100 | 0.86634400  |
| H | 2.65489200  | -4.79982300  | -3.37352800 | N  | -5.35805600  | -0.61980900 | 0.85007400  |
| H | 0.60409900  | -6.77253800  | -4.47853500 | C  | -3.92245500  | -2.39412200 | -0.08194400 |
| H | 1.32623500  | -7.48525600  | -2.20303000 | C  | -3.53550900  | -1.70729100 | -1.22253200 |
| H | -0.30372800 | -6.82506700  | -2.13076000 | C  | -2.76399000  | -2.26583700 | -2.31011600 |
| H | 1.06381000  | -5.84528400  | -1.58098800 | C  | -2.71399700  | -1.32424100 | -3.30026400 |
| H | -1.10723900 | -5.08976400  | -3.78830700 | C  | -3.42186400  | -0.16099900 | -2.81846000 |
| H | 0.00996000  | -4.35542500  | -4.95250400 | N  | -3.92411100  | -0.40998900 | -1.54089900 |
| H | 0.17057200  | -3.98836600  | -3.22821900 | C  | -3.49956700  | 1.04735700  | -3.49537200 |
| N | 4.40878300  | -6.74880100  | -3.22600000 | C  | -3.99030000  | 2.22531600  | -2.95296300 |
| C | 5.46213400  | -7.78372700  | -3.36995600 | C  | -3.95626900  | 3.51148500  | -3.60092500 |
| C | 6.76725200  | -6.98143100  | -3.18049400 | C  | -4.45817300  | 4.43057500  | -2.71793600 |
| C | 6.36979100  | -5.90881100  | -2.14301900 | C  | -4.83747600  | 3.71539100  | -1.52617400 |
| C | 4.91928900  | -5.53265700  | -2.51981000 | N  | -4.51801200  | 2.36099800  | -1.66090700 |
| C | 5.37626500  | -8.93591200  | -2.36068300 | C  | -5.52231400  | 4.27243800  | -0.45824200 |
| O | 6.29046600  | -9.79504900  | -2.31201000 | C  | -6.09433300  | 3.52903200  | 0.56397900  |
| H | 5.37549800  | -8.23437300  | -4.36278500 | C  | -6.96082000  | 4.06459200  | 1.58862200  |
| H | 7.58234900  | -7.62882700  | -2.85195600 | C  | -7.42588000  | 3.00779800  | 2.32084200  |
| H | 7.05356300  | -6.51358000  | -4.12921200 | C  | -6.82680600  | 1.81255900  | 1.77524400  |
| H | 6.40451300  | -6.33383400  | -1.13313400 | N  | -6.01320700  | 2.14549100  | 0.69526300  |
| H | 7.02845400  | -5.03594600  | -2.15881800 | Fe | -5.06507200  | 0.83727000  | -0.48355100 |
| H | 4.88442800  | -4.66687600  | -3.18917100 | H  | -7.63732700  | 0.43294700  | 3.16206700  |
| H | 4.30917100  | -5.31058900  | -1.63810900 | H  | -3.56763500  | -3.41124500 | 0.04098800  |
| N | 4.29449200  | -8.97537300  | -1.54591700 | H  | -3.13705600  | 1.08101700  | -4.51646300 |
| C | 4.10343000  | -10.05512800 | -0.59898400 | H  | -5.66916300  | 5.34690200  | -0.48278300 |
| C | 2.81877500  | -9.80276400  | 0.18446600  | O  | 0.62434400   | 4.23340700  | -0.70575500 |
| O | 2.12120400  | -8.77678200  | -0.02234700 | C  | -0.13043200  | 3.66868500  | -1.62036800 |
| H | 3.56686500  | -8.27232300  | -1.58134200 | O  | -0.45475800  | 4.23381900  | -2.70857400 |
| H | 4.04801200  | -11.02092200 | -1.12108800 | C  | -0.69273200  | 2.27050600  | -1.31745600 |
| N | 2.49945200  | -10.75300000 | 1.10288200  | C  | 0.34806000   | 1.28015000  | -0.80068800 |
| C | 1.30226400  | -10.68688000 | 1.95421300  | C  | 1.51084800   | 1.05501800  | -1.78533800 |
| C | 0.27864700  | -11.79789300 | 1.65730700  | C  | 2.50184900   | -0.02185000 | -1.30541600 |
| C | -0.33520300 | -11.78740100 | 0.23775000  | C  | 3.71066100   | -0.18538100 | -2.24618100 |
| C | -1.25349300 | -13.01283400 | 0.05525600  | C  | 4.71151100   | -1.27861100 | -1.82342000 |
| C | -1.09665700 | -10.48023100 | -0.06216500 | C  | 5.42889700   | -1.01476100 | -0.48561100 |
| H | 3.10439200  | -11.55754400 | 1.20120700  | C  | 6.48696400   | -2.08091800 | -0.15639100 |
| H | 0.86886300  | -9.69752500  | 1.79653400  | H  | -1.16639400  | 1.90226100  | -2.22911200 |
| H | 0.75082800  | -12.77629900 | 1.83525500  | H  | -2.64698200  | 2.43298600  | -0.67555400 |
| H | -0.53065500 | -11.71010800 | 2.39826200  | H  | 0.73671400   | 1.64539800  | 0.15838600  |
| H | 0.48959000  | -11.87256800 | -0.48651500 | H  | -0.16472800  | 0.33062200  | -0.60111800 |
| H | -1.65887400 | -13.05117900 | -0.96226300 | H  | 2.05341600   | 2.00024900  | -1.92989500 |
| H | -2.10140000 | -12.97076300 | 0.75191600  | H  | 1.10873100   | 0.77487700  | -2.76931100 |
| H | -0.71415100 | -13.95022900 | 0.23906000  | H  | 2.84591300   | 0.24025000  | -0.29402300 |
| H | -1.56780100 | -10.53073600 | -1.05095500 | H  | 1.97838300   | -0.98587600 | -1.21481000 |
| H | -0.43063900 | -9.61126200  | -0.05683200 | H  | 3.34879800   | -0.42185300 | -3.25570600 |
| H | -1.89280700 | -10.31651700 | 0.67738900  | H  | 4.23879300   | 0.77827100  | -2.32446400 |
| C | -8.59367200 | -1.93315200  | -2.97477800 | H  | 4.19026300   | -2.24646700 | -1.78056800 |
| C | -7.23889900 | -1.49012000  | -2.37773800 | H  | 5.46620200   | -1.37920000 | -2.61590200 |
| S | -7.27534600 | 0.35322400   | -1.89165700 | H  | 5.90807200   | -0.02419700 | -0.52397000 |
| C | -8.87350100 | -1.24641200  | -4.29896600 | H  | 4.69605300   | -0.97029700 | 0.33241200  |
| O | -8.37842600 | -1.66319000  | -5.38007100 | H  | 7.25641100   | -2.12473800 | -0.93756800 |
| H | -9.39512600 | -1.74425800  | -2.25215000 | H  | 6.03131000   | -3.07689500 | -0.08253600 |

|   |              |              |             |
|---|--------------|--------------|-------------|
| O | -0.11287700  | 6.55015900   | 1.73850600  |
| H | -0.50777600  | 5.65418300   | 1.57397200  |
| H | 0.22329500   | 6.91059600   | 0.89276800  |
| O | -0.49011400  | 3.82272900   | 1.54079200  |
| H | -1.21455600  | 3.26953400   | 1.12638900  |
| H | 0.16768600   | 3.93720500   | 0.76334000  |
| O | -1.74618400  | 2.42486400   | -0.27773600 |
| H | -4.77170900  | -1.69154100  | -7.88169500 |
| H | -5.68597600  | -2.62779800  | -6.67084700 |
| H | -10.64949100 | 1.45334600   | -5.17456000 |
| H | -8.55533500  | -3.01040700  | -3.17189700 |
| H | -8.10498300  | 3.02289700   | 3.16066300  |
| H | -6.89064900  | -2.08225900  | 3.44482200  |
| H | 0.90033600   | 6.12830500   | 6.24464800  |
| H | 0.31934200   | 4.09134400   | 8.27334600  |
| H | 6.98843000   | -1.87289700  | 0.79616100  |
| H | 3.48633900   | 9.46705800   | 3.15601700  |
| H | 5.89794900   | 10.81872300  | -0.27012400 |
| H | -3.71013200  | 10.45497900  | -1.64951700 |
| H | -5.22162700  | 7.38966000   | 1.19349600  |
| H | -0.81067300  | 3.38689600   | -8.68283300 |
| H | -0.08072400  | 2.25662400   | -7.53857500 |
| H | -11.75894300 | 6.43294300   | 1.33512900  |
| H | -10.33779600 | 5.41801500   | 1.02049500  |
| H | 4.03043900   | -4.14612400  | -7.58313500 |
| H | 1.61710300   | -10.74961700 | 3.00374800  |
| H | 4.96069900   | -10.12307400 | 0.08522800  |
| H | 7.33342200   | 2.78730200   | -9.06381900 |
| H | -2.33679800  | -3.25767400  | -2.31628600 |
| H | -2.22749100  | -1.38781100  | -4.26287000 |
| H | -3.57185100  | 3.67315800   | -4.59627300 |
| H | -4.59517100  | 5.49519100   | -2.83490700 |
| H | -7.19949100  | 5.11189200   | 1.69926400  |
| H | -5.09380200  | -3.67336500  | 2.19989200  |

<sup>4</sup>P<sub>OH,B,β</sub>

|   |            |             |             |
|---|------------|-------------|-------------|
| C | 5.20464900 | 10.51455800 | -1.19513200 |
| C | 6.04962700 | 9.68200300  | -2.20148200 |
| C | 5.25536100 | 8.83227600  | -3.22201500 |
| C | 4.34948300 | 6.92272000  | -4.12453100 |
| C | 6.23731900 | 8.00039000  | -4.07218100 |
| C | 4.35599200 | 9.65265500  | -0.28418500 |
| O | 3.17342600 | 9.30791800  | -0.59283500 |
| H | 4.53552900 | 11.19055000 | -1.73375000 |
| H | 6.69081600 | 10.38582800 | -2.75084500 |
| H | 6.72098800 | 9.02006900  | -1.63695300 |
| H | 4.61752500 | 8.13013600  | -2.66575800 |
| H | 3.85654900 | 9.06865600  | -4.87867100 |
| H | 3.56329300 | 10.19947200 | -3.55439600 |
| H | 4.93542700 | 10.45482900 | -4.65532300 |
| H | 5.69515700 | 7.36453400  | -4.78149000 |
| H | 6.85472200 | 7.34977400  | -3.44214800 |
| H | 6.90570300 | 8.65224800  | -4.64995300 |
| N | 4.93246200 | 9.23832600  | 0.87109300  |
| C | 4.28431900 | 8.34682200  | 1.83912900  |
| C | 5.05640400 | 7.02413300  | 2.04406700  |
| C | 5.22018800 | 6.19717500  | 0.78205600  |
| C | 4.10417300 | 5.61879200  | 0.14850200  |
| C | 4.25534400 | 4.86460100  | -1.02146800 |
| C | 5.53072200 | 4.67312900  | -1.57125600 |
| C | 6.64789700 | 5.23877000  | -0.94751300 |
| C | 6.49097300 | 5.99811600  | 0.21944700  |
| H | 5.88042300 | 9.53226000  | 1.06356300  |
| H | 3.27884500 | 8.15409300  | 1.46023700  |
| H | 6.04404000 | 7.24398800  | 2.47153100  |
| H | 4.51325500 | 6.45030900  | 2.80928300  |
| H | 3.11067100 | 5.75409800  | 0.57194100  |
| H | 3.38283900 | 4.43419900  | -1.50418300 |
| H | 5.64402500 | 4.08108500  | -2.47348600 |
| H | 7.63992800 | 5.08671900  | -1.36175800 |
| H | 7.36464300 | 6.42706800  | 0.70391100  |
| C | 2.84165000 | 2.06130000  | 5.76522300  |
| C | 2.27776600 | 2.74573600  | 4.56608900  |
| N | 2.10102700 | 4.13686000  | 4.49042800  |
| C | 1.57323500 | 4.47387600  | 3.28676900  |

|   |              |             |             |
|---|--------------|-------------|-------------|
| N | 1.40894300   | 3.34173900  | 2.59439400  |
| C | 1.83448700   | 2.26099600  | 3.35945300  |
| H | 3.86284900   | 2.39652700  | 5.98268700  |
| H | 2.87756700   | 0.98275500  | 5.59581600  |
| H | 1.31309800   | 5.45517700  | 2.90222000  |
| H | 1.78809200   | 1.24886100  | 2.99728600  |
| H | 0.98234700   | 3.34117200  | 1.59283000  |
| C | -9.62796500  | 10.68164400 | -2.53131400 |
| C | -9.69389500  | 9.38658200  | -1.69735200 |
| C | -8.27794100  | 8.78922500  | -1.50867000 |
| C | -8.19992100  | 7.59490700  | -0.54304100 |
| C | -10.67097800 | 8.38083300  | -2.33762700 |
| H | -9.24300300  | 10.47470800 | -3.53900400 |
| H | -10.07949000 | 9.64616000  | -0.69744700 |
| H | -7.88764900  | 8.49203100  | -2.49492100 |
| H | -7.61407600  | 9.58801500  | -1.14228000 |
| H | -8.60542800  | 7.86186300  | 0.44199100  |
| H | -8.77012100  | 6.73625500  | -0.91472700 |
| H | -7.16221200  | 7.27003700  | -0.40628400 |
| H | -11.66487600 | 8.82715700  | -2.46163400 |
| H | -10.78637500 | 7.47761800  | -1.72907200 |
| H | -10.31590000 | 8.07530500  | -3.33114300 |
| C | 5.29603500   | 4.10068900  | -6.76121100 |
| C | 4.91196300   | 2.87333900  | -5.96320700 |
| C | 3.74293400   | 2.15375000  | -6.26136500 |
| C | 3.40751500   | 0.99663400  | -5.54652600 |
| C | 4.23162900   | 0.53951400  | -4.50911000 |
| C | 5.39873700   | 1.25232700  | -4.20181600 |
| C | 5.73477700   | 2.40392600  | -4.92256100 |
| H | 5.73777800   | 4.87444000  | -6.12232300 |
| H | 4.42839100   | 4.53519300  | -7.26814100 |
| H | 3.09677000   | 2.49684900  | -7.06484400 |
| H | 2.51136000   | 0.44306700  | -5.81110800 |
| H | 3.97367800   | -0.36309600 | -3.96196200 |
| H | 6.05020900   | 0.90584300  | -3.40480400 |
| H | 6.65161100   | 2.93955500  | -4.68704300 |
| C | -3.98058000  | 9.31373900  | -0.61751200 |
| C | -2.76478900  | 9.44602500  | -1.57510100 |
| C | -2.83452500  | 8.49188100  | -2.78198500 |
| C | -1.53506200  | 8.43513600  | -3.60926400 |
| N | -0.47390100  | 7.65587100  | -2.95345200 |
| C | 0.54638700   | 8.12073000  | -2.23038300 |
| N | 0.79036400   | 9.44078700  | -2.05511100 |
| N | 1.37692900   | 7.23754800  | -1.61579800 |
| C | -3.93923100  | 8.02338200  | 0.18557100  |
| O | -4.50008000  | 6.97025800  | -0.23889400 |
| H | -4.90720800  | 9.30109100  | -1.19932600 |
| H | -1.84039100  | 9.26411400  | -1.01045800 |
| H | -2.71666600  | 10.48376900 | -1.93553800 |
| H | -3.07457600  | 7.47680800  | -2.44520900 |
| H | -3.65384100  | 8.80640100  | -3.44279000 |
| H | -1.73243900  | 7.93769200  | -4.56373500 |
| H | -1.18029200  | 9.44533900  | -3.85424500 |
| H | -0.49334100  | 6.61956200  | -3.13260500 |
| H | 0.21884300   | 10.14067600 | -2.49436900 |
| H | 1.63061800   | 9.71455700  | -1.54596200 |
| H | 1.29825900   | 6.21933000  | -1.81119400 |
| H | 2.24038700   | 7.60271600  | -1.22432300 |
| N | -3.24322100  | 8.02216400  | 1.35437500  |
| C | -3.12443300  | 6.78759300  | 2.17011700  |
| C | -2.50575500  | 7.28264500  | 3.48921500  |
| C | -1.66038900  | 8.49955400  | 3.05280400  |
| C | -2.53060500  | 9.16903300  | 1.97166600  |
| H | -2.47045800  | 6.07187900  | 1.65844000  |
| H | -3.29178200  | 7.59220100  | 4.18883800  |
| H | -1.90765100  | 6.50730600  | 3.97630400  |
| H | -1.42775100  | 9.18246800  | 3.87498700  |
| H | -0.72390800  | 8.14588600  | 2.60736900  |
| H | -1.93171100  | 9.70870800  | 1.23329200  |
| H | -3.24734400  | 9.87410800  | 2.41484300  |
| C | -1.44959500  | 5.88904900  | -7.80822500 |
| C | -2.38867700  | 5.50709500  | -6.65433400 |
| H | -0.83763400  | 6.76335700  | -7.55326900 |
| H | -1.82751000  | 5.26437500  | -5.74429600 |
| H | -3.08151400  | 6.32718000  | -6.42162400 |

|   |             |              |             |    |              |             |             |
|---|-------------|--------------|-------------|----|--------------|-------------|-------------|
| H | -2.99749000 | 4.63368000   | -6.91970800 | C  | -8.80201900  | -1.76272900 | -2.95244800 |
| C | 4.25939100  | -3.35167200  | -5.46430100 | O  | -8.73828800  | -2.14897600 | -4.14915300 |
| C | 3.59923500  | -4.01783700  | -6.69142300 | H  | -8.45352100  | -2.26913200 | -0.87057800 |
| C | 2.25039800  | -3.46309100  | -7.13348000 | H  | -5.96229300  | -2.52368900 | -1.10259300 |
| C | 1.72252900  | -3.89077400  | -8.36693900 | H  | -6.08018400  | -2.07234600 | -2.82012600 |
| C | 0.49473700  | -3.41398900  | -8.83149500 | N  | -9.54962200  | -0.67947800 | -2.58773900 |
| C | -0.23474400 | -2.49270700  | -8.06835400 | C  | -10.35201300 | 0.06810000  | -3.55231500 |
| C | 0.27636100  | -2.06112400  | -6.84132400 | C  | -9.56759100  | 0.81543900  | -4.63671000 |
| C | 1.50928900  | -2.54186300  | -6.37502600 | O  | -10.17387800 | 1.24454600  | -5.64281600 |
| C | 3.60125600  | -3.61071300  | -4.11244500 | H  | -9.48885400  | -0.34879800 | -1.63541700 |
| O | 3.28799000  | -2.66802500  | -3.33398100 | H  | -11.02042100 | -0.61184200 | -4.08852300 |
| H | 4.30333300  | -2.26812600  | -5.59670300 | N  | -8.22307400  | 0.95754000  | -4.44607200 |
| H | 3.50203500  | -5.10076400  | -6.51959100 | C  | -7.35859500  | 1.48039400  | -5.49381000 |
| H | 4.30076500  | -3.92480000  | -7.53144700 | C  | -6.52657400  | 0.41782400  | -6.22066000 |
| H | 2.28451900  | -4.60044800  | -8.96910000 | O  | -5.49099900  | 0.76425800  | -6.85721900 |
| H | 0.10976900  | -3.75487500  | -9.78752800 | H  | -7.79469900  | 0.65933000  | -3.57399700 |
| H | -1.18608100 | -2.11568800  | -8.43036400 | H  | -6.66732400  | 2.22219200  | -5.08789400 |
| H | -0.28211600 | -1.35085200  | -6.23934000 | H  | -8.00024500  | 1.97497700  | -6.23127400 |
| H | 1.88154700  | -2.19484000  | -5.41747500 | N  | -6.97745400  | -0.85564500 | -6.17292400 |
| N | 3.40652800  | -4.91883800  | -3.78595400 | C  | -6.31760900  | -1.93231100 | -6.90803500 |
| C | 2.88309900  | -5.37367900  | -2.49075900 | H  | -7.76507800  | -1.10725400 | -5.57968200 |
| C | 1.43444700  | -5.94464800  | -2.60662900 | H  | -5.42083900  | -2.28831600 | -6.38645400 |
| C | 0.90402100  | -6.40682000  | -1.23524200 | C  | -4.06275300  | -0.63988500 | 2.24191200  |
| C | 0.48611700  | -4.91490500  | -3.24608500 | C  | -3.63151200  | -1.54564000 | 1.28736100  |
| C | 3.86165400  | -6.45703600  | -2.02249200 | C  | -3.23915100  | -2.90597100 | 1.56481800  |
| O | 4.19277500  | -7.36095100  | -2.85343800 | C  | -2.82025500  | -3.45577800 | 0.38360300  |
| H | 3.72548500  | -5.65990200  | -4.39825600 | C  | -2.97036000  | -2.44451400 | -0.63448100 |
| H | 2.87907300  | -4.50223500  | -1.83287600 | N  | -3.46454200  | -1.27047800 | -0.06889900 |
| H | 1.49768200  | -6.82431500  | -3.26302000 | C  | -2.70491700  | -2.63763800 | -1.98126200 |
| H | 1.49666700  | -7.22217700  | -0.81153900 | C  | -2.92002900  | -1.68758400 | -2.96567500 |
| H | -0.11733200 | -6.78925400  | -1.34247900 | C  | -2.75063300  | -1.91669500 | -4.38119200 |
| H | 0.86960000  | -5.56645700  | -0.52731000 | C  | -3.12586400  | -0.76938800 | -5.02642900 |
| H | -0.51747900 | -5.34807400  | -3.34008800 | C  | -3.49396800  | 0.18711500  | -4.01143000 |
| H | 0.81621500  | -4.61541800  | -4.24465200 | N  | -3.37609400  | -0.38781200 | -2.74487700 |
| H | 0.41444500  | -4.01032300  | -2.62867600 | C  | -3.85053800  | 1.49960200  | -4.27690900 |
| N | 4.37908000  | -6.41712900  | -0.77438700 | C  | -4.09472800  | 2.45155000  | -3.30153700 |
| C | 5.46565700  | -7.35889700  | -0.36048300 | C  | -4.40362500  | 3.83449300  | -3.55681900 |
| C | 6.12689400  | -6.63035300  | 0.81884100  | C  | -4.56999000  | 4.44994200  | -2.34428200 |
| C | 4.95989000  | -5.85255300  | 1.46473500  | C  | -4.38539400  | 3.44537200  | -1.32986300 |
| C | 4.10864300  | -5.38696300  | 0.26745200  | N  | -4.06044700  | 2.21672900  | -1.91908900 |
| C | 4.90622200  | -8.73910500  | 0.05077900  | C  | -4.56519800  | 3.66485600  | 0.02498400  |
| O | 4.95963000  | -9.14601900  | 1.23536300  | C  | -4.51426900  | 2.66882900  | 0.98768100  |
| H | 6.13574200  | -7.49581900  | -1.21571100 | C  | -4.77745700  | 2.87775100  | 2.39085500  |
| H | 6.58085200  | -7.33865000  | 1.51281400  | C  | -4.67048900  | 1.66301900  | 3.00956600  |
| H | 6.89679200  | -5.94422700  | 0.44759100  | C  | -4.32395100  | 0.69777300  | 1.99457700  |
| H | 4.38417300  | -6.53297200  | 2.09965100  | N  | -4.23672300  | 1.32319800  | 0.75358200  |
| H | 5.29592900  | -5.01038700  | 2.07632700  | Fe | -4.02574300  | 0.40530100  | -1.02377900 |
| H | 4.42738100  | -4.40135900  | -0.09478200 | H  | -4.16463700  | -0.99315400 | 3.26213300  |
| H | 3.04291800  | -5.34548100  | 0.50240800  | H  | -2.33241300  | -3.60797500 | -2.28924000 |
| N | 4.39996900  | -9.47418600  | -0.97790100 | H  | -3.96332500  | 1.78098100  | -5.31769200 |
| C | 3.77212300  | -10.75679100 | -0.74461200 | H  | -4.78439600  | 4.68271400  | 0.32910700  |
| C | 2.23905200  | -10.68909200 | -0.79318900 | O  | 1.07637100   | 4.45352800  | -2.00455300 |
| O | 1.61489700  | -9.60353000  | -0.78779400 | C  | 0.22484300   | 4.16017500  | -2.95898100 |
| H | 4.31076800  | -9.01569000  | -1.88547400 | O  | -0.47508500  | 5.04612200  | -3.54867700 |
| H | 4.13228400  | -11.49067200 | -1.47669300 | C  | 0.06729200   | 2.72006300  | -3.43747600 |
| N | 1.62377400  | -11.90712400 | -0.82300500 | C  | -0.18323400  | 1.64445700  | -2.35595900 |
| C | 0.16394000  | -12.07749800 | -0.81803300 | C  | 1.07580000   | 1.07420100  | -1.69594300 |
| C | -0.38951900 | -12.67200700 | -2.12634800 | C  | 0.77198400   | -0.06699600 | -0.70821600 |
| C | -0.15857600 | -11.82696000 | -3.40104800 | C  | 2.02803500   | -0.85072200 | -0.28064600 |
| C | -0.66568300 | -12.59357500 | -4.63931600 | C  | 1.73282600   | -1.99227000 | 0.71507400  |
| C | -0.81536200 | -10.43494400 | -3.30854500 | C  | 1.34386200   | -1.53468500 | 2.13448200  |
| H | 2.19439400  | -12.74160800 | -0.84204700 | C  | 0.99163200   | -2.70503600 | 3.06780000  |
| H | -0.25915600 | -11.09009400 | -0.62279600 | H  | 0.97327700   | 2.44647500  | -3.99635300 |
| H | 0.04653700  | -13.67154300 | -2.27739400 | H  | -0.76408800  | 2.72573900  | -4.14686800 |
| H | -1.47080000 | -12.82760500 | -1.99066300 | H  | -2.01992200  | 2.20148100  | -1.57289700 |
| H | 0.92700600  | -11.68208200 | -3.51524400 | H  | -0.71697900  | 0.81123100  | -2.83027000 |
| H | -0.46534200 | -12.03099300 | -5.55855800 | H  | 1.63981100   | 1.87427700  | -1.20293300 |
| H | -1.74959900 | -12.75922900 | -4.57879100 | H  | 1.71874900   | 0.69690500  | -2.50293100 |
| H | -0.18163000 | -13.57373200 | -4.73091500 | H  | 0.25030000   | 0.34547400  | 0.16481600  |
| H | -0.68599500 | -9.88780800  | -4.25029000 | H  | 0.06595800   | -0.76870000 | -1.17778100 |
| H | -0.37236200 | -9.83196800  | -2.50935500 | H  | 2.49843800   | -1.27825900 | -1.17640800 |
| H | -1.89464000 | -10.52607300 | -3.12349700 | H  | 2.76629300   | -0.16182300 | 0.16190800  |
| C | -7.99670000 | -2.43199100  | -1.85292500 | H  | 0.92400600   | -2.61977800 | 0.30992200  |
| C | -6.53261100 | -1.94729900  | -1.83357200 | H  | 2.61831600   | -2.64043400 | 0.79212900  |
| S | -6.42659100 | -0.10477100  | -1.34315800 | H  | 2.18660500   | -0.96583300 | 2.56180900  |



|   |             |              |             |    |              |             |             |
|---|-------------|--------------|-------------|----|--------------|-------------|-------------|
| H | -1.84962600 | 4.13781600   | -7.88929400 | C  | -9.24795000  | -1.03833000 | -2.52868700 |
| H | -2.08079000 | 5.22932600   | -5.60636700 | C  | -7.81003000  | -0.88513800 | -1.99265900 |
| H | -2.20307400 | 6.45256900   | -6.87965400 | S  | -7.47487000  | 0.90754100  | -1.43186300 |
| H | -3.67008900 | 5.87186500   | -6.07951000 | C  | -9.46218800  | -0.25630000 | -3.81256600 |
| C | 0.40870100  | -2.44285700  | -4.66178500 | O  | -9.07843800  | -0.69676100 | -4.92835200 |
| C | 0.31551300  | -3.09548600  | -6.07554900 | H  | -9.96503100  | -0.73877800 | -1.75662600 |
| C | -0.78471200 | -4.13131600  | -6.25167300 | H  | -7.66547600  | -1.54032400 | -1.13147200 |
| C | -0.49462100 | -5.50586200  | -6.34109100 | H  | -7.08776200  | -1.14906000 | -2.76880700 |
| C | -1.52506000 | -6.44419200  | -6.49856900 | N  | -10.03510600 | 0.97702000  | -3.68675600 |
| C | -2.85630100 | -6.02481500  | -6.57717600 | C  | -10.28742500 | 1.83818600  | -4.83902600 |
| C | -3.15631200 | -4.65776900  | -6.50019800 | C  | -9.04627800  | 2.35881600  | -5.57144200 |
| C | -2.12969300 | -3.72221700  | -6.33935500 | O  | -9.17615200  | 2.87238100  | -6.70416400 |
| C | 1.17465800  | -3.23792900  | -3.61098100 | H  | -10.23058600 | 1.32583600  | -2.75926400 |
| O | 2.04415100  | -2.68016600  | -2.88151400 | H  | -10.86633700 | 1.29463700  | -5.59153200 |
| H | -0.60167000 | -2.22983600  | -4.28609100 | N  | -7.84253900  | 2.21260700  | -4.94257300 |
| H | 1.28569400  | -3.53593900  | -6.33338900 | C  | -6.59211800  | 2.50194400  | -5.62774000 |
| H | 0.14575500  | -2.28180300  | -6.79208900 | C  | -5.82849800  | 1.26424600  | -6.10880000 |
| H | 0.53360900  | -5.85246100  | -6.28067200 | O  | -4.59723300  | 1.35954800  | -6.38822100 |
| H | -1.27902400 | -7.49903100  | -6.56426600 | H  | -7.80137800  | 1.86588300  | -3.98805700 |
| H | -3.65212600 | -6.75113000  | -6.70650400 | H  | -5.92418600  | 3.07501200  | -4.98146400 |
| H | -4.18580800 | -4.32160500  | -6.57883700 | H  | -6.83079300  | 3.11325300  | -6.50501100 |
| H | -2.36983500 | -2.66219900  | -6.30544800 | N  | -6.53441300  | 0.12099800  | -6.24892600 |
| N | 0.87027300  | -4.55788000  | -3.49546000 | C  | -5.94160800  | -1.09321500 | -6.80352600 |
| C | 1.62994700  | -5.49944200  | -2.65382600 | H  | -7.49985800  | 0.06541500  | -5.92998300 |
| C | 0.68119900  | -6.52468200  | -1.97944300 | H  | -5.47771800  | -1.70974500 | -6.02291900 |
| C | 1.47183400  | -7.52571100  | -1.11667000 | C  | -6.42060300  | 0.03307600  | 2.76022100  |
| C | -0.39263000 | -5.81130900  | -1.13655100 | C  | -5.95250200  | -0.98283800 | 1.94478200  |
| C | 2.63586000  | -6.18841200  | -3.59851700 | C  | -5.97113000  | -2.38264300 | 2.29138300  |
| O | 2.19647400  | -6.86197000  | -4.56848900 | C  | -5.38927700  | -0.06328700 | 1.25784500  |
| H | 0.22343100  | -4.97409800  | -4.15545600 | C  | -5.01681700  | -2.08929100 | 0.26124700  |
| H | 2.13054800  | -4.90498300  | -1.88917500 | N  | -5.36496900  | -0.80939400 | 0.69236200  |
| H | 0.18941500  | -7.08278800  | -2.78956900 | C  | -4.42788000  | -2.39478600 | -0.95473900 |
| H | 2.16958300  | -8.13372400  | -1.69877200 | C  | -4.10318000  | -1.46060200 | -1.92363800 |
| H | 0.78532400  | -8.21962600  | -0.61915100 | C  | -3.56529000  | -1.77796900 | -3.22530500 |
| H | 2.03958200  | -7.00790000  | -0.33156500 | C  | -3.42620600  | -0.59782500 | -3.90492300 |
| H | -1.08592500 | -6.54482700  | -0.70948700 | C  | -3.85488800  | 0.45547600  | -3.01801500 |
| H | -0.97224100 | -5.09764000  | -1.73087800 | N  | -4.28098500  | -0.08263100 | -1.80387300 |
| H | 0.06699700  | -5.26176600  | -0.30378900 | C  | -3.81045700  | 1.80268400  | -3.33907500 |
| N | 3.97435500  | -5.99431900  | -3.40458300 | C  | -4.16676600  | 2.82430600  | -2.47644600 |
| C | 4.94026500  | -6.36228800  | -4.47187700 | C  | -4.10853900  | 4.22690300  | -2.79480200 |
| C | 6.02808200  | -5.27382200  | -4.34393100 | C  | -4.56678900  | 4.91395700  | -1.70205400 |
| C | 6.07088200  | -4.99598500  | -2.82627100 | C  | -4.91420400  | 3.94055200  | -0.70115800 |
| C | 4.59348500  | -5.08778300  | -2.38694000 | N  | -4.64045400  | 2.64756900  | -1.16710700 |
| C | 5.55011000  | -7.76436700  | -4.34706700 | C  | -5.46912900  | 4.25124100  | 0.52833800  |
| O | 6.44835800  | -8.12614900  | -5.14592200 | C  | -5.87781600  | 3.30712600  | 1.45602500  |
| H | 4.42251500  | -6.33761300  | -5.43479800 | C  | -6.48537200  | 3.62352000  | 2.72575500  |
| H | 6.97899000  | -5.61755900  | -4.75499100 | C  | -6.76821600  | 2.43891400  | 3.34605500  |
| H | 5.71756700  | -4.37341300  | -4.88557900 | C  | -6.33112800  | 1.38265000  | 2.46571000  |
| H | 6.67009100  | -5.76086700  | -2.31856300 | N  | -5.78476000  | 1.92400900  | 1.30398500  |
| H | 6.49815800  | -4.01773300  | -2.59094100 | Fe | -5.24397500  | 0.90547500  | -0.34801700 |
| H | 4.10386000  | -4.10906100  | -2.42068300 | H  | -6.86586000  | -0.24722700 | 3.70832400  |
| H | 4.48416800  | -5.50408800  | -1.38040100 | H  | -4.22593700  | -3.43802100 | -1.17055900 |
| N | 5.08665700  | -8.56573800  | -3.35836700 | H  | -3.51054300  | 2.06031500  | -4.34836600 |
| C | 5.55947700  | -9.92707900  | -3.20610500 | H  | -5.59900900  | 5.30403100  | 0.75477100  |
| C | 4.78188900  | -10.59365500 | -2.07442500 | O  | 0.87964500   | 4.56421300  | -1.74447600 |
| O | 3.91792800  | -9.95778600  | -1.41774900 | C  | 0.04155300   | 4.24860800  | -2.71079300 |
| H | 4.35183300  | -8.27249200  | -2.72696300 | O  | -0.68839900  | 5.12263200  | -3.29249000 |
| H | 5.42752800  | -10.48448000 | -4.14385600 | C  | -0.11154300  | 2.84617900  | -3.17943500 |
| N | 5.09613200  | -11.89387200 | -1.83576400 | C  | 0.58778800   | 1.74066900  | -2.84139200 |
| C | 4.45278900  | -12.70378400 | -0.78974800 | C  | 1.71831400   | 1.54790900  | -1.86856000 |
| C | 3.60949600  | -13.86389000 | -1.34988400 | C  | 1.49361700   | 0.30057500  | -0.97867000 |
| C | 2.41825200  | -13.45737400 | -2.24865100 | C  | 2.69518300   | -0.00908000 | -0.06621100 |
| C | 1.74890100  | -14.71682000 | -2.83488800 | C  | 2.61041400   | -1.38826700 | 0.62110300  |
| C | 1.38903600  | -12.58699100 | -1.49922900 | C  | 1.46619500   | -1.53394400 | 1.64251400  |
| H | 5.79146600  | -12.34151500 | -2.41812200 | C  | 1.43712300   | -2.91600900 | 2.31506900  |
| H | 3.84091600  | -12.01650200 | -0.20269000 | H  | -0.88071900  | 2.75448200  | -3.94039100 |
| H | 4.26631800  | -14.54416000 | -1.91355900 | H  | -2.74732100  | 2.41843100  | -0.29030800 |
| H | 3.23186900  | -14.44347000 | -0.49390200 | H  | -1.43089200  | 1.96177100  | -1.07402900 |
| H | 2.81638300  | -12.86534700 | -3.08732400 | H  | 0.30510000   | 0.82350200  | -3.36343300 |
| H | 0.93185500  | -14.44682300 | -3.51373400 | H  | 1.87757600   | 2.44332500  | -1.26495400 |
| H | 1.32734400  | -15.34162800 | -2.03623800 | H  | 2.64106700   | 1.38431700  | -2.44972100 |
| H | 2.46570000  | -15.32846300 | -3.39650200 | H  | 0.58381900   | 0.44556000  | -0.37802700 |
| H | 0.53235600  | -12.36503900 | -2.14667500 | H  | 1.32163100   | -0.57062500 | -1.62511100 |
| H | 1.81842300  | -11.63186800 | -1.17970400 | H  | 3.60980900   | 0.02152500  | -0.67453700 |
| H | 1.00827400  | -13.11321100 | -0.61304800 | H  | 2.80634200   | 0.78375400  | 0.69219500  |



|                          |              |              |             |   |             |             |             |
|--------------------------|--------------|--------------|-------------|---|-------------|-------------|-------------|
| H                        | 2.49765500   | -2.15541900  | -0.15821700 | H | 2.07527400  | 4.89321100  | 3.10069200  |
| H                        | 3.56405500   | -1.59484400  | 1.13084900  | H | 4.55522600  | 3.51485600  | 4.29069000  |
| H                        | 1.57034900   | -0.75675800  | 2.41864800  | H | 2.97824500  | 2.79093100  | 3.99584800  |
| H                        | 0.50125600   | -1.34859100  | 1.15213600  | H | 2.15362700  | 3.00363800  | 1.40001800  |
| H                        | 2.37824900   | -3.12130700  | 2.84089700  | H | 2.91037700  | 2.36836000  | -0.88010000 |
| H                        | 1.29609800   | -3.70805300  | 1.56911200  | H | 5.32390000  | 2.12579800  | -1.37408300 |
| O                        | 0.67535600   | 6.38706400   | 1.42521900  | H | 7.00295500  | 2.52228400  | 0.43254100  |
| H                        | 0.23752700   | 5.53657300   | 1.14494200  | H | 6.24940000  | 3.16073600  | 2.70471700  |
| H                        | 0.80157300   | 6.95065500   | 0.63318100  | C | -1.60900700 | -2.74237600 | 3.09115500  |
| O                        | 0.14023100   | 3.83831400   | 0.62480400  | C | -1.21363600 | -1.33573600 | 2.79568600  |
| H                        | -0.69571800  | 3.29223600   | 0.45633000  | N | -0.49600100 | -0.53690400 | 3.70144200  |
| H                        | 0.54533500   | 4.05859800   | -0.28353900 | C | -0.29406700 | 0.69488000  | 3.17083400  |
| O                        | -1.77205000  | 2.31976200   | -0.23119900 | N | -0.85037600 | 0.70080900  | 1.95751900  |
| H                        | -5.17455400  | -0.81916500  | -7.53107900 | C | -1.43245200 | -0.53405400 | 1.70193800  |
| H                        | -6.72308500  | -1.67742000  | -7.29401900 | H | -0.73964200 | -3.37339100 | 3.31053500  |
| H                        | -10.88648500 | 2.69212900   | -4.51076500 | H | -2.12103900 | -3.17115500 | 2.22698300  |
| H                        | -9.42177400  | -2.09479300  | -2.76398600 | H | 0.18932700  | 1.55435000  | 3.61099400  |
| H                        | -7.23010500  | 2.28023400   | 4.30951100  | H | -1.98151100 | -0.71305400 | 0.79581100  |
| H                        | -6.37388200  | -2.78013700  | 3.21144300  | H | -0.80714700 | 1.55211200  | 1.28494300  |
| H                        | 2.92711900   | 4.87331100   | 5.18648600  | C | -3.94484700 | 11.10669300 | -8.04122300 |
| H                        | 2.87740000   | 2.32155600   | 6.64068000  | C | -4.92638400 | 10.04487300 | -7.50688300 |
| H                        | 0.62057700   | -2.99405000  | 3.04216600  | C | -4.69793000 | 9.80837200  | -5.99394200 |
| H                        | 4.38530100   | 8.97463200   | 2.73764800  | C | -5.73891400 | 8.90134600  | -5.31705100 |
| H                        | 5.84803500   | 11.29804900  | -0.71978900 | C | -4.81548600 | 8.74319400  | -8.32514100 |
| H                        | -3.70619700  | 10.60761900  | 0.45426800  | H | -2.90605900 | 10.76572600 | -7.93335100 |
| H                        | -4.47785200  | 6.81666100   | 2.66072000  | H | -5.94937000 | 10.43633400 | -7.62882000 |
| H                        | -3.40928200  | 4.81076500   | -8.38026600 | H | -3.68972400 | 9.38544500  | -5.85368500 |
| H                        | -3.34110700  | 3.57234700   | -7.11913200 | H | -4.69456100 | 10.78756700 | -5.48984500 |
| H                        | -10.08382200 | 11.28793700  | -4.34211500 | H | -6.75316600 | 9.29592600  | -5.45501600 |
| H                        | -8.53285400  | 11.69974800  | -3.58615500 | H | -5.72136300 | 7.88566400  | -5.72761100 |
| H                        | 0.93183300   | -1.48533000  | -4.73783300 | H | -5.55521300 | 8.82527300  | -4.23791800 |
| H                        | 5.23260800   | -13.10242700 | -0.12854900 | H | -4.97502200 | 8.93982700  | -9.39168100 |
| H                        | 6.63636600   | -9.94223000  | -2.98632700 | H | -5.55395100 | 7.99691900  | -8.01333500 |
| H                        | 9.63120500   | -0.23458600  | -4.63633900 | H | -3.81623900 | 8.29933500  | -8.21399000 |
| H                        | -3.35011100  | -2.77794100  | -3.57387400 | C | 3.64523400  | 4.60924200  | -5.45674700 |
| H                        | -3.10897900  | -0.42460300  | -4.92230800 | C | 3.57341900  | 3.11645900  | -5.21601000 |
| H                        | -3.73898200  | 4.62165300   | -3.72916400 | C | 2.42912200  | 2.38037800  | -5.56416000 |
| H                        | -4.67963200  | 5.97715900   | -1.55197000 | C | 2.37775800  | 0.99388400  | -5.36896200 |
| H                        | -6.67601700  | 4.62689600   | 3.07729000  | C | 3.47089300  | 0.31340600  | -4.81740300 |
| H                        | -5.22490400  | -4.12687400  | 1.16550600  | C | 4.61696000  | 1.04117900  | -4.46510300 |
| <b>4P<sub>DC,B</sub></b> |              |              |             | C | 4.66656100  | 2.42565100  | -4.66092100 |
| C                        | 4.66419700   | 7.77400500   | 1.76030200  | H | 4.06611900  | 5.13654800  | -4.59164300 |
| C                        | 5.64300800   | 7.22799300   | 0.68223300  | H | 2.65427500  | 5.02883600  | -5.66043800 |
| C                        | 5.04745900   | 7.01949200   | -0.73116600 | H | 1.57743700  | 2.89611900  | -6.00079800 |
| C                        | 4.62113900   | 8.35024300   | -1.38301200 | H | 1.48645700  | 0.44306200  | -5.65652400 |
| C                        | 6.06967900   | 6.28713300   | -1.62353500 | H | 3.43302200  | -0.76314500 | -4.67448500 |
| C                        | 3.58868900   | 6.77447300   | 2.13930600  | H | 5.47602000  | 0.52485800  | -4.04643600 |
| O                        | 2.52223300   | 6.65776300   | 1.45757700  | H | 5.56424800  | 2.97725900  | -4.39229100 |
| H                        | 4.16967100   | 8.68106400   | 1.40062600  | C | -2.46934100 | 10.40252500 | -2.10869900 |
| H                        | 6.48437600   | 7.93165000   | 0.60979700  | C | -1.36325200 | 9.33714300  | -2.18078400 |
| H                        | 6.05836200   | 6.27503800   | 1.03721500  | C | -1.69987200 | 8.18431100  | -3.14385400 |
| H                        | 4.16052900   | 6.37682100   | -0.63841600 | C | -0.75551500 | 6.97210700  | -3.05110100 |
| H                        | 4.20092300   | 8.17447300   | -2.38045500 | N | -0.79574100 | 6.27096600  | -1.75331700 |
| H                        | 3.86646800   | 8.88264600   | -0.79123500 | C | 0.13275300  | 6.36059500  | -0.77309400 |
| H                        | 5.48374900   | 9.01918500   | -1.49958000 | N | 1.08397800  | 7.31581400  | -0.79728600 |
| H                        | 5.66609800   | 6.12697100   | -2.63053000 | N | 0.12684900  | 5.48353700  | 0.23773000  |
| H                        | 6.32840300   | 5.30818700   | -1.20493000 | C | -3.68770500 | 9.90609300  | -1.32793300 |
| H                        | 6.99337300   | 6.87216700   | -1.72436200 | O | -3.66820500 | 8.79292900  | -0.72537500 |
| N                        | 3.84344500   | 6.00068100   | 3.21917900  | H | -2.77363600 | 10.71203300 | -3.11833300 |
| C                        | 2.99072500   | 4.90299600   | 3.69254900  | H | -1.22448800 | 8.93586800  | -1.17117200 |
| C                        | 3.69357700   | 3.52898400   | 3.60926800  | H | -0.42509300 | 9.81944500  | -2.49369200 |
| C                        | 4.14855800   | 3.13882700   | 2.21443700  | H | -2.71877900 | 7.83832900  | -2.94617700 |
| C                        | 3.21390700   | 2.90665100   | 1.18816300  | H | -1.67959400 | 8.54573400  | -4.18179100 |
| C                        | 3.63868300   | 2.54855400   | -0.09514100 |   |             |             |             |
| C                        | 5.00420200   | 2.41073500   | -0.37723200 |   |             |             |             |
| C                        | 5.94257500   | 2.63557600   | 0.63589700  |   |             |             |             |
| C                        | 5.51485100   | 2.99888600   | 1.91988900  |   |             |             |             |
| H                        | 4.71406800   | 6.15420700   | 3.70993300  |   |             |             |             |

|   |             |             |             |   |              |              |             |
|---|-------------|-------------|-------------|---|--------------|--------------|-------------|
| H | -1.02945200 | 6.24003000  | -3.81858200 | C | 6.02584100   | -4.78016900  | -2.87976900 |
| H | 0.28303500  | 7.25817200  | -3.25193200 | C | 8.22717300   | -7.34911800  | -3.56184600 |
| H | -1.61249200 | 5.70339100  | -1.56183400 | O | 9.44745200   | -7.57280500  | -3.75391300 |
| H | 1.00901500  | 8.11371500  | -1.40389000 | H | 7.59248800   | -6.35048000  | -5.32074400 |
| H | 1.80837500  | 7.28977200  | -0.07182300 | H | 9.32652200   | -4.98926100  | -3.68818000 |
| H | -0.37071400 | 4.57827600  | 0.20572000  | H | 8.13621900   | -4.09547900  | -4.65642500 |
| H | 0.79136900  | 5.62317300  | 0.99502800  | H | 7.86442100   | -4.93663200  | -1.71451300 |
| N | -4.78250500 | 10.70473700 | -1.30092600 | H | 7.59184400   | -3.32144400  | -2.38145400 |
| C | -6.01550500 | 10.29683400 | -0.57705400 | H | 5.46887900   | -3.95149000  | -3.33059300 |
| C | -7.06665800 | 11.31181000 | -1.06036500 | H | 5.49679400   | -5.10031900  | -1.97667000 |
| C | -6.23911800 | 12.57905200 | -1.37452500 | N | 7.45983900   | -8.12401600  | -2.75890200 |
| C | -4.92768600 | 12.02401000 | -1.96537500 | C | 7.99488100   | -9.30910400  | -2.11866400 |
| H | -5.84550800 | 10.35801300 | 0.50508600  | C | 6.88078500   | -9.98118000  | -1.32078100 |
| H | -7.55776300 | 10.94433300 | -1.96911400 | O | 5.73850700   | -9.46136800  | -1.23695600 |
| H | -7.84313400 | 11.49071900 | -0.31208300 | H | 6.47635600   | -7.93714400  | -2.60747500 |
| H | -6.74504200 | 13.25932800 | -2.06471400 | H | 8.40300200   | -10.00004900 | -2.86930100 |
| H | -6.02883600 | 13.13231400 | -0.45152500 | N | 7.21910600   | -11.14993400 | -0.71598600 |
| H | -4.06826700 | 12.66832400 | -1.75564700 | C | 6.28685900   | -11.93912200 | 0.10393000  |
| H | -5.00293700 | 11.89743600 | -3.05427400 | C | 5.92159100   | -13.29686700 | -0.52334400 |
| C | -1.23871300 | 4.86953700  | -6.96453000 | C | 5.17326800   | -13.23464700 | -1.87563100 |
| C | -2.18648700 | 4.20003200  | -5.95855400 | C | 4.99546100   | -14.65779100 | -2.44249400 |
| H | -0.49732700 | 5.50300200  | -6.46042200 | C | 3.81349000   | -12.51624300 | -1.76213200 |
| H | -1.63665200 | 3.56820200  | -5.24961900 | H | 8.15248300   | -11.51529100 | -0.85107500 |
| H | -2.74736700 | 4.94305100  | -5.37792400 | H | 5.40077700   | -11.31791900 | 0.24667700  |
| H | -2.91922600 | 3.56408500  | -6.46768500 | H | 6.84004200   | -13.89033300 | -0.64993700 |
| C | 2.94600600  | -3.25397800 | -7.06646800 | H | 5.30261500   | -13.84376900 | 0.20408800  |
| C | 1.88774500  | -3.94946300 | -7.94841100 | H | 5.79900800   | -12.66657400 | -2.58136600 |
| C | 0.46334800  | -3.97646300 | -7.41000100 | H | 4.50940500   | -14.63062300 | -3.42444200 |
| C | -0.45454600 | -4.88966700 | -7.96215400 | H | 4.36994200   | -15.26741800 | -1.77684600 |
| C | -1.78702300 | -4.91616900 | -7.54209500 | H | 5.95961300   | -15.16802700 | -2.55777700 |
| C | -2.22884900 | -4.02731700 | -6.55396200 | H | 3.28466200   | -12.54699500 | -2.72211200 |
| C | -1.32611800 | -3.12082200 | -5.99026700 | H | 3.92986100   | -11.46407200 | -1.48310600 |
| C | 0.00939100  | -3.09617100 | -6.41367600 | H | 3.17517800   | -13.00856300 | -1.01549500 |
| C | 3.15986800  | -3.84302000 | -5.67694300 | C | -9.65857200  | 1.84736800   | 2.06399000  |
| O | 3.20443200  | -3.10803700 | -4.65080900 | C | -8.29908500  | 1.48538000   | 1.43086100  |
| H | 2.70320000  | -2.19800700 | -6.92648700 | S | -7.25547200  | 3.03867300   | 1.07171300  |
| H | 2.20123500  | -4.97904000 | -8.17117800 | C | -10.53221300 | 2.64844400   | 1.11700100  |
| H | 1.89074600  | -3.43613400 | -8.92147600 | O | -11.18623900 | 2.10273600   | 0.18909100  |
| H | -0.12036300 | -5.58210900 | -8.73074100 | H | -9.49385700  | 2.39021500   | 3.00135800  |
| H | -2.47740900 | -5.62847700 | -7.98301100 | H | -7.73738700  | 0.84652400   | 2.11578700  |
| H | -3.26379600 | -4.04494900 | -6.22724600 | H | -8.45565200  | 0.94602200   | 0.49284100  |
| H | -1.65477900 | -2.42854900 | -5.22113500 | N | -10.52417100 | 4.00421000   | 1.28702300  |
| H | 0.69578500  | -2.39650700 | -5.94900800 | C | -11.29805200 | 4.89816800   | 0.43260800  |
| N | 3.35017400  | -5.18952700 | -5.61758000 | C | -10.84224800 | 5.00040100   | -1.02745800 |
| C | 3.69355400  | -5.92126300 | -4.38564800 | O | -11.57898000 | 5.58328600   | -1.85494200 |
| C | 2.71168400  | -7.09345400 | -4.11708300 | H | -9.88024000  | 4.39793100   | 1.95824300  |
| C | 3.09210500  | -7.83527700 | -2.82199700 | H | -12.33767600 | 4.55974300   | 0.39155300  |
| C | 1.25621500  | -6.59599100 | -4.05461100 | N | -9.65187300  | 4.41827700   | -1.35190900 |
| C | 5.12903100  | -6.42963900 | -4.60639200 | C | -9.23516900  | 4.26740400   | -2.73771100 |
| O | 5.34092500  | -7.26441200 | -5.52346100 | C | -9.34690500  | 2.83830200   | -3.28063000 |
| H | 3.38653900  | -5.73355200 | -6.47002200 | O | -8.69331100  | 2.50964400   | -4.31093800 |
| H | 3.62811600  | -5.19849900 | -3.57216000 | H | -9.04520200  | 4.04102800   | -0.62616100 |
| H | 2.81739900  | -7.79397200 | -4.95787300 | H | -8.19981500  | 4.58967800   | -2.86764800 |
| H | 4.09345600  | -8.27336300 | -2.85838400 | H | -9.87663400  | 4.91528700   | -3.34518400 |
| H | 2.39039200  | -8.65609200 | -2.63707500 | N | -10.18703100 | 1.99887600   | -2.63484000 |
| H | 3.04439200  | -7.16237500 | -1.95473700 | C | -10.43889500 | 0.64392200   | -3.12012500 |
| H | 0.57655800  | -7.44208900 | -3.90122100 | H | -10.63074200 | 2.27523600   | -1.76162300 |
| H | 0.95647700  | -6.08261900 | -4.97287100 | H | -9.59978500  | -0.02691400  | -2.89986900 |
| H | 1.11666600  | -5.89871800 | -3.21783400 | C | -4.03344200  | 1.98833400   | 3.72611900  |
| N | 6.14623900  | -5.90787200 | -3.85427100 | C | -4.54257600  | 0.86163800   | 3.09594000  |
| C | 7.55701200  | -6.15036700 | -4.24628900 | C | -4.75608200  | -0.41648800  | 3.73771900  |
| C | 8.25922700  | -4.83215100 | -3.85417200 | C | -5.20169500  | -1.28312900  | 2.77600400  |
| C | 7.49169200  | -4.39064100 | -2.58885800 | C | -5.27953500  | -0.54255100  | 1.53635500  |

|    |              |             |             |                         |             |              |             |
|----|--------------|-------------|-------------|-------------------------|-------------|--------------|-------------|
| N  | -4.88005000  | 0.77082600  | 1.75182900  | H                       | 2.71122400  | -4.99885300  | 1.16450000  |
| C  | -5.72071400  | -1.06776800 | 0.32853200  | H                       | 2.70582200  | 5.10217000   | 4.73336300  |
| C  | -5.88681100  | -0.33913900 | -0.84139800 | H                       | 5.23989800  | 8.05550300   | 2.65059900  |
| C  | -6.45480400  | -0.85982000 | -2.06810600 | H                       | -2.08475400 | 11.30768300  | -1.61693600 |
| C  | -6.54208400  | 0.18280000  | -2.94892800 | H                       | -6.26194700 | 9.25941400   | -0.81503700 |
| C  | -6.00495000  | 1.34830300  | -2.28009100 | H                       | -1.79010100 | 5.50275000   | -7.66902100 |
| N  | -5.60552600  | 1.01118200  | -0.99241700 | H                       | -0.69076800 | 4.12373000   | -7.55203100 |
| C  | -5.91138900  | 2.60522400  | -2.85720100 | H                       | -4.12002000 | 11.30814200  | -9.10422000 |
| C  | -5.37918500  | 3.72500300  | -2.23267400 | H                       | -4.04646000 | 12.05417400  | -7.49772400 |
| C  | -5.29226800  | 5.03673000  | -2.83671600 | H                       | 3.90893800  | -3.28294500  | -7.59625600 |
| C  | -4.72266400  | 5.87059700  | -1.91241100 | H                       | 6.74301800  | -12.10057600 | 1.08884900  |
| C  | -4.45087000  | 5.07531600  | -0.73363000 | H                       | 8.82996000  | -9.04552500  | -1.45439800 |
| N  | -4.86031200  | 3.76817200  | -0.94529300 | H                       | 4.28356100  | 4.84448900   | -6.31869200 |
| C  | -3.88616700  | 5.57531800  | 0.43456800  | H                       | -6.76894200 | -1.88361600  | -2.21143700 |
| C  | -3.70098100  | 4.83603500  | 1.59506600  | H                       | -6.96255900 | 0.20181700   | -3.94298200 |
| C  | -3.18861900  | 5.37528700  | 2.83464900  | H                       | -5.64708000 | 5.27495800   | -3.82905900 |
| C  | -3.24544900  | 4.37179400  | 3.76711200  | H                       | -4.53426700 | 6.93204800   | -1.96548700 |
| C  | -3.78736300  | 3.20486600  | 3.10434800  | H                       | -2.86820200 | 6.39845200   | 2.96884600  |
| N  | -4.04224000  | 3.49992500  | 1.77260600  | H                       | -5.47880500 | -2.32171000  | 2.88802800  |
| Fe | -4.90868100  | 2.27727600  | 0.41589600  | <b>4P<sub>CO2</sub></b> |             |              |             |
| H  | -3.81452400  | 1.91476200  | 4.78627200  | C                       | -0.11828100 | 0.00000000   | -1.25934500 |
| H  | -6.00188900  | -2.11535100 | 0.31011600  | O                       | 0.44240400  | -0.12886500  | -0.22003800 |
| H  | -6.33970000  | 2.72605100  | -3.84549400 | O                       | -0.67896600 | 0.12886500   | -2.29865200 |
| H  | -3.63031300  | 6.63022100  | 0.44532000  | <b>2ReB</b>             |             |              |             |
| C  | -2.32454300  | 0.25158900  | -3.76566300 | C                       | 5.71912100  | 7.48874300   | 1.98175400  |
| C  | -1.70066500  | -0.34015600 | -2.73533200 | C                       | 6.24870100  | 6.35922200   | 1.05106200  |
| C  | -0.28541500  | -0.06756300 | -2.28742800 | C                       | 5.46206300  | 6.13772300   | -0.26419300 |
| C  | 0.53183900   | -1.34541400 | -1.99523000 | C                       | 5.55161100  | 7.35353100   | -1.20704000 |
| C  | 1.90331400   | -1.03136200 | -1.36864400 | C                       | 5.98034600  | 4.86740300   | -0.96886200 |
| C  | 2.76674600   | -2.27300300 | -1.06764500 | C                       | 4.38345700  | 7.15060300   | 2.60900800  |
| C  | 2.18888900   | -3.20284100 | 0.01748400  | O                       | 3.28452600  | 7.33685300   | 2.00284500  |
| C  | 3.13971100   | -4.35240900 | 0.38958000  | H                       | 5.60100500  | 8.41770600   | 1.41671500  |
| H  | -1.82367200  | 0.98626100  | -4.39255200 | H                       | 7.29171600  | 6.59895200   | 0.80057900  |
| H  | -3.35229500  | 0.01657200  | -4.02537400 | H                       | 6.26944500  | 5.41820000   | 1.61805900  |
| H  | -2.87520700  | 1.41675500  | -1.31295100 | H                       | 4.40489900  | 5.97476700   | -0.01082700 |
| H  | -2.24527000  | -1.08320200 | -2.14860400 | H                       | 5.00417500  | 7.16048200   | -2.13656400 |
| H  | -0.32379900  | 0.53176000  | -1.36165500 | H                       | 5.12733500  | 8.25931800   | -0.75869200 |
| H  | 0.23651100   | 0.54545300  | -3.03476700 | H                       | 6.59575700  | 7.56451600   | -1.47305200 |
| H  | -0.05004900  | -1.99196000 | -1.32165700 | H                       | 5.42480600  | 4.67909300   | -1.89460000 |
| H  | 0.67882000   | -1.91305700 | -2.92401900 | H                       | 5.87126400  | 3.98649100   | -0.32571100 |
| H  | 2.45823100   | -0.37509100 | -2.05321300 | H                       | 7.04154400  | 4.96953600   | -1.23172200 |
| H  | 1.75429600   | -0.45829900 | -0.43816000 | N                       | 4.41700300  | 6.60578700   | 3.85215300  |
| H  | 2.91780600   | -2.83456000 | -2.00023300 | C                       | 3.22267800  | 6.16600200   | 4.57913900  |
| H  | 3.76198800   | -1.93442800 | -0.74220300 | C                       | 3.20912900  | 4.64391900   | 4.84969100  |
| H  | 1.96447200   | -2.60831600 | 0.91764600  | C                       | 3.27815500  | 3.78977800   | 3.59695300  |
| H  | 1.23210200   | -3.62354600 | -0.32206300 | C                       | 2.21918700  | 3.77156800   | 2.67001400  |
| H  | 4.09619400   | -3.96727500 | 0.76524600  | C                       | 2.30028000  | 3.00202600   | 1.50307200  |
| H  | 3.35397500   | -4.98244500 | -0.48296100 | C                       | 3.44375500  | 2.23150400   | 1.25053400  |
| O  | 0.06114900   | 3.64397100  | 2.83624400  | C                       | 4.49938000  | 2.23323300   | 2.16867300  |
| H  | -0.17508900  | 3.37185100  | 1.89341400  | C                       | 4.41553800  | 3.00993900   | 3.33157400  |
| H  | -0.68856600  | 4.14124900  | 3.21925200  | H                       | 5.31687300  | 6.47038100   | 4.29176000  |
| O  | -0.59154800  | 2.78551800  | 0.40710900  | H                       | 2.36723300  | 6.45922300   | 3.96750400  |
| H  | -1.46569369  | 2.44460600  | 0.06120681  | H                       | 4.04538300  | 4.38805400   | 5.51416000  |
| H  | 0.14672800   | 2.55212900  | -0.19408800 | H                       | 2.29068500  | 4.42517800   | 5.41418000  |
| O  | -2.82948100  | 1.65648200  | -0.36755400 | H                       | 1.32123200  | 4.35849600   | 2.85243200  |
| H  | -10.58729300 | 0.65737800  | -4.20323200 | H                       | 1.47615000  | 3.01311800   | 0.79576300  |
| H  | -11.33601600 | 0.26118000  | -2.63044900 | H                       | 3.50935800  | 1.63500700   | 0.34634600  |
| H  | -11.29172100 | 5.89864900  | 0.87389900  | H                       | 5.38447400  | 1.63268500   | 1.98325400  |
| H  | -10.19823600 | 0.92123200  | 2.29504900  | H                       | 5.23787400  | 3.00496600   | 4.04262200  |
| H  | -2.99035700  | 4.41877900  | 4.81674100  | C                       | 0.02924100  | 1.62925700   | 7.42290200  |
| H  | -4.59720900  | -0.60923200 | 4.78932800  | C                       | -0.46914400 | 2.16743100   | 6.12055700  |
| H  | -0.18423300  | -0.83247600 | 4.61377900  | N                       | -0.73090500 | 3.53281800   | 5.91930400  |
| H  | -2.29758800  | -2.79853700 | 3.94221600  | C                       | -1.14537100 | 3.74747900   | 4.64606700  |
|    |              |             |             | N                       | -1.16318300 | 2.56164600   | 4.02678100  |
|    |              |             |             | C                       | -0.75010900 | 1.57016600   | 4.91464200  |
|    |              |             |             | H                       | 0.99472100  | 2.06975400   | 7.69877900  |
|    |              |             |             | H                       | 0.16765200  | 0.54784100   | 7.35334600  |
|    |              |             |             | H                       | -1.36066900 | 4.69069500   | 4.14765700  |
|    |              |             |             | H                       | -0.68212500 | 0.53677200   | 4.62460100  |
|    |              |             |             | H                       | -1.44886900 | 2.47481500   | 2.97768200  |

|   |             |             |              |   |              |              |             |
|---|-------------|-------------|--------------|---|--------------|--------------|-------------|
| C | -3.45388500 | 13.42763200 | -6.54570200  | C | -0.17661300  | 0.26154300   | -6.78227600 |
| C | -3.55779800 | 12.02265000 | -7.17111900  | C | 0.57363900   | -0.88907100  | -7.06680900 |
| C | -3.40034400 | 10.93050700 | -6.08536200  | C | 2.61304000   | -3.33524600  | -6.37480500 |
| C | -3.65691300 | 9.49413100  | -6.57308100  | O | 3.35879600   | -2.50622600  | -5.78447800 |
| C | -2.53555300 | 11.86023800 | -8.31332900  | H | 2.82325400   | -2.33240300  | -8.22856500 |
| H | -2.46086500 | 13.58192100 | -6.10110000  | H | 0.29001400   | -4.04800800  | -7.82437600 |
| H | -4.56725500 | 11.91594500 | -7.60093300  | H | 0.74518100   | -3.29822500  | -9.33388600 |
| H | -2.38450300 | 11.00932300 | -5.66277100  | H | -1.70043600  | -2.53417400  | -8.98945800 |
| H | -4.09627000 | 11.16088200 | -5.26390900  | H | -3.02137900  | -0.50569900  | -8.48676400 |
| H | -4.62848000 | 9.42583400  | -7.07998700  | H | -2.03737600  | 1.31368000   | -7.08854400 |
| H | -2.88840200 | 9.16990100  | -7.28473800  | H | 0.26049600   | 1.04640600   | -6.17230100 |
| H | -3.66948800 | 8.77974600  | -5.74117300  | H | 1.57526400   | -0.97631800  | -6.66126100 |
| H | -2.66310800 | 12.64601300 | -9.06798700  | N | 2.05419600   | -4.39523200  | -5.72091500 |
| H | -2.63816300 | 10.89373200 | -8.81823400  | C | 2.27132300   | -4.67564900  | -4.29089500 |
| H | -1.50939000 | 11.93259100 | -7.92659200  | C | 0.92519800   | -4.88311900  | -3.54733300 |
| C | 6.41948700  | 3.26665000  | -10.19460500 | C | 1.16249300   | -5.25204100  | -2.07040000 |
| C | 5.90952800  | 2.17515200  | -9.27832600  | C | 0.03560600   | -3.63224800  | -3.66598800 |
| C | 4.53104400  | 1.98611700  | -9.07923100  | C | 3.14046200   | -5.94201000  | -4.21721700 |
| C | 4.05680800  | 0.95705900  | -8.25782800  | O | 2.64596900   | -7.04108100  | -4.57787900 |
| C | 4.95414400  | 0.09387500  | -7.61421800  | H | 1.55222500   | -5.10334300  | -6.24115800 |
| C | 6.33029800  | 0.27691200  | -7.80321800  | H | 2.78243200   | -3.80214900  | -3.88430900 |
| C | 6.80140500  | 1.30716600  | -8.62437000  | H | 0.42254300   | -5.73163300  | -4.03259900 |
| H | 7.41057200  | 3.61785200  | -9.88728700  | H | 1.70716400   | -6.19376200  | -1.96055200 |
| H | 5.74364700  | 4.12877100  | -10.20683600 | H | 0.20411000   | -5.37195900  | -1.55139200 |
| H | 3.82606400  | 2.65007100  | -9.57300200  | H | 1.72906400   | -4.47042700  | -1.54762800 |
| H | 2.98682300  | 0.82819800  | -8.12164100  | H | -0.94451500  | -3.82435400  | -3.21278700 |
| H | 4.58705800  | -0.70576300 | -6.97718800  | H | -0.12543000  | -3.34020500  | -4.70814800 |
| H | 7.03751800  | -0.38336700 | -7.30938000  | H | 0.49438700   | -2.77988300  | -3.14581600 |
| H | 7.87133500  | 1.44094800  | -8.76214700  | N | 4.43833000   | -5.82707400  | -3.79957300 |
| C | -3.79350500 | 9.19927400  | -2.25225100  | C | 5.36473300   | -6.97732200  | -3.93228900 |
| C | -2.29102200 | 9.28382300  | -1.87498400  | C | 6.69240000   | -6.30661100  | -4.34379900 |
| C | -1.35258200 | 8.73598600  | -2.96793800  | C | 6.66617500   | -4.97462000  | -3.56119500 |
| C | 0.09194700  | 8.56367800  | -2.47157700  | C | 5.18047900   | -4.54468600  | -3.57856000 |
| N | 0.18682500  | 7.44123500  | -1.52261300  | C | 5.54582800   | -7.79897400  | -2.64935600 |
| C | 1.02476900  | 7.36857300  | -0.48429300  | O | 6.38699800   | -8.72942900  | -2.61295200 |
| N | 1.90635300  | 8.35099200  | -0.19279700  | H | 4.97249700   | -7.65825400  | -4.69221500 |
| N | 0.99274600  | 6.28324800  | 0.33136200   | H | 7.54789300   | -6.93967500  | -4.10141000 |
| C | -4.21949400 | 7.75316700  | -2.44625600  | H | 6.68967100   | -6.12074200  | -5.42366900 |
| O | -4.17379700 | 7.21667000  | -3.58703200  | H | 7.00405800   | -5.13918700  | -2.53151300 |
| H | -3.96768100 | 9.71817300  | -3.19895100  | H | 7.31079600   | -4.21009600  | -4.00345600 |
| H | -2.12027500 | 8.72798100  | -0.94278100  | H | 4.96675400   | -3.84373500  | -4.39122900 |
| H | -2.03790900 | 10.33335800 | -1.66831600  | H | 4.87716700   | -4.07878200  | -2.63504900 |
| H | -1.72282800 | 7.77648400  | -3.34723500  | N | 4.78368600   | -7.46523900  | -1.57732400 |
| H | -1.34226900 | 9.42369000  | -3.82318700  | C | 4.88383600   | -8.19710900  | -0.33066500 |
| H | 0.76490900  | 8.38820300  | -3.32155000  | C | 4.04466300   | -7.49334700  | 0.73095300  |
| H | 0.41200800  | 9.49025300  | -1.97718700  | O | 3.31244500   | -6.51274400  | 0.44078300  |
| H | -0.34640000 | 6.56990100  | -1.75265300  | H | 4.11472400   | -6.70611600  | -1.60738200 |
| H | 2.00352500  | 9.15677800  | -0.78460000  | H | 4.53394100   | -9.23245000  | -0.45669400 |
| H | 2.53967600  | 8.22330000  | 0.59783400   | N | 4.14832400   | -8.00473200  | 1.98790700  |
| H | 0.44681200  | 5.43391600  | 0.08504900   | C | 3.40255000   | -7.47845100  | 3.13987300  |
| H | 1.71716300  | 6.20996900  | 1.03731800   | C | 2.34868100   | -8.45826400  | 3.68726900  |
| N | -4.55563400 | 7.03124200  | -1.34014500  | C | 1.20551900   | -8.83247900  | 2.71465900  |
| C | -4.78424500 | 5.56806500  | -1.44202900  | C | 0.30854500   | -9.91374200  | 3.35016900  |
| C | -5.23507700 | 5.15930500  | -0.02567500  | C | 0.37188500   | -7.60665200  | 2.28958500  |
| C | -4.65725800 | 6.25596900  | 0.89902800   | H | 4.75998500   | -8.79521800  | 2.14238000  |
| C | -4.72279600 | 7.53445200  | 0.04180700   | H | 2.94211500   | -6.54650400  | 2.80633600  |
| H | -3.84911900 | 5.08587600  | -1.74934700  | H | 2.85441200   | -9.37948700  | 4.01453900  |
| H | -6.32960300 | 5.15871500  | 0.03354200   | H | 1.91549000   | -8.00952400  | 4.59448500  |
| H | -4.88846400 | 4.15607300  | 0.23807900   | H | 1.66130300   | -9.26152300  | 1.80914200  |
| H | -5.22056100 | 6.36133000  | 1.83172400   | H | -0.48061700  | -10.22683900 | 2.65706000  |
| H | -3.61780200 | 6.03639800  | 1.16693000   | H | -0.17582300  | -9.53338400  | 4.25960500  |
| H | -3.93942900 | 8.24994600  | 0.30482000   | H | 0.88721100   | -10.80371000 | 3.62583300  |
| H | -5.69426600 | 8.03832500  | 0.15346200   | H | -0.46318700  | -7.91600000  | 1.64975200  |
| C | -2.77689000 | 5.55136000  | -7.25180700  | H | 0.97041000   | -6.88405600  | 1.72558100  |
| C | -2.50739700 | 5.01409000  | -5.83809400  | H | -0.05212000  | -7.10272400  | 3.16982000  |
| H | -2.81065000 | 6.64683800  | -7.26177700  | C | -8.01171000  | -3.90099900  | 0.15452500  |
| H | -1.51405800 | 5.30733600  | -5.47707500  | C | -6.74033100  | -3.09304400  | -0.13640500 |
| H | -3.23591000 | 5.39892600  | -5.11784600  | S | -7.14409100  | -1.29396900  | -0.57196900 |
| H | -2.54979100 | 3.91573800  | -5.81774000  | C | -8.97385200  | -3.87076900  | -1.02434300 |
| C | 2.30390900  | -3.22130400 | -7.86227300  | O | -8.59599300  | -4.13063800  | -2.19447900 |
| C | 0.80769000  | -3.17231800 | -8.24449700  | H | -8.49396000  | -3.52996700  | 1.06579500  |
| C | 0.03734700  | -1.91164600 | -7.86759500  | H | -6.07180500  | -3.08508900  | 0.72880100  |
| C | -1.27145000 | -1.75506000 | -8.36413500  | H | -6.20486500  | -3.50954300  | -0.99323300 |
| C | -2.01978400 | -0.60993700 | -8.08117900  | N | -10.26123800 | -3.50225600  | -0.74844700 |
| C | -1.47116100 | 0.40930600  | -7.28981900  | C | -11.29891200 | -3.46806300  | -1.77934300 |

|    |              |             |             |                                                            |              |             |              |
|----|--------------|-------------|-------------|------------------------------------------------------------|--------------|-------------|--------------|
| C  | -11.18969600 | -2.33014500 | -2.80245000 | H                                                          | -2.72960500  | 2.27794500  | 1.19598800   |
| O  | -11.95427000 | -2.32379300 | -3.79004700 | H                                                          | -1.28099400  | 3.01038100  | 0.81834300   |
| H  | -10.51551300 | -3.28397600 | 0.20349800  | O                                                          | -4.13493000  | 1.55757300  | 0.35239200   |
| H  | -11.27295000 | -4.39550100 | -2.35950800 | H                                                          | -7.15520700  | -2.59061400 | -6.06623400  |
| N  | -10.22527600 | -1.38954000 | -2.58078500 | H                                                          | -6.47699100  | -3.21646400 | -4.54274600  |
| C  | -9.87977200  | -0.38358200 | -3.57612500 | H                                                          | -12.27592600 | -3.40603400 | -1.29325400  |
| C  | -8.57299200  | -0.65898700 | -4.32962200 | H                                                          | -7.72848100  | -4.94805300 | 0.33266400   |
| O  | -8.01872000  | 0.27431700  | -4.96846600 | H                                                          | -5.89807900  | -1.20623700 | 4.88413800   |
| H  | -9.66462200  | -1.43537800 | -1.73939200 | H                                                          | -2.12618900  | -3.36820300 | 1.89675000   |
| H  | -9.79228600  | 0.60369400  | -3.11505400 | H                                                          | -0.63598500  | 4.25140900  | 6.62057800   |
| H  | -10.69554400 | -0.34875300 | -4.30580300 | H                                                          | -0.67609000  | 1.82183700  | 8.24012500   |
| N  | -8.09497900  | -1.92631000 | -4.28288400 | H                                                          | 6.91600900   | -0.82857000 | -1.41403200  |
| C  | -6.90727500  | -2.33800300 | -5.02805400 | H                                                          | 3.16118700   | 6.71063300  | 5.52996700   |
| H  | -8.55501500  | -2.62907300 | -3.71264800 | H                                                          | 6.46101500   | 7.68064000  | 2.76675700   |
| H  | -6.17771200  | -1.52646400 | -5.03779900 | H                                                          | -4.39470800  | 9.69832900  | -1.48434100  |
| C  | -4.36007700  | -1.69148300 | 2.52096200  | H                                                          | -5.53248500  | 5.35304400  | -2.21014900  |
| C  | -3.64497500  | -1.81520200 | 1.33504100  | H                                                          | -3.74259900  | 5.19619400  | -7.63311900  |
| C  | -2.51976700  | -2.70192400 | 1.14294000  | H                                                          | -2.00280600  | 5.23217400  | -7.96112400  |
| C  | -2.08534100  | -2.52595700 | -0.14103400 | H                                                          | -3.60695200  | 14.20978300 | -7.29879500  |
| C  | -2.94747300  | -1.53826200 | -0.74897400 | H                                                          | -4.20180200  | 13.56864700 | -5.75525100  |
| N  | -3.89946100  | -1.11241800 | 0.16831900  | H                                                          | 2.75646800   | -4.08668700 | -8.36685700  |
| C  | -2.85554500  | -1.11456000 | -2.06565600 | H                                                          | 4.11888700   | -7.23119300 | 3.93368400   |
| C  | -3.71241600  | -0.20750000 | -2.67053300 | H                                                          | 5.93370200   | -8.26392100 | -0.01579600  |
| C  | -3.68237100  | 0.14154700  | -4.07583200 | H                                                          | 6.50813300   | 2.90914900  | -11.22981200 |
| C  | -4.73821700  | 0.97913800  | -4.29873400 | H                                                          | -2.95696800  | -0.22500400 | -4.78765300  |
| C  | -5.40324500  | 1.16776300  | -3.02845600 | H                                                          | -5.07112900  | 1.41816400  | -5.22604300  |
| N  | -4.76331500  | 0.44006600  | -2.04207500 | H                                                          | -8.73503400  | 3.66118900  | -2.22184600  |
| C  | -6.52294400  | 1.96818400  | -2.84676100 | H                                                          | -9.32479500  | 3.63639100  | 0.42184500   |
| C  | -7.13285600  | 2.21136400  | -1.62595000 | H                                                          | -7.68570500  | 0.79309800  | 4.54134700   |
| C  | -8.25336400  | 3.10454300  | -1.43154300 | H                                                          | -1.26567200  | -3.01700800 | -0.64432300  |
| C  | -8.54737600  | 3.09462400  | -0.09664400 |                                                            |              |             |              |
| C  | -7.62581200  | 2.17605000  | 0.53429700  |                                                            |              |             |              |
| N  | -6.76186900  | 1.64750100  | -0.41253500 | <b><sup>2</sup>TS1</b> <sub>HA,B,<math>\alpha</math></sub> |              |             |              |
| C  | -7.65964100  | 1.82020700  | 1.87518600  | C                                                          | 4.30489000   | 9.85266700  | 1.18045800   |
| C  | -6.88774900  | 0.82503300  | 2.44816900  | C                                                          | 5.33977400   | 9.14893400  | 0.25720000   |
| C  | -6.99663100  | 0.38100800  | 3.81861800  | C                                                          | 4.77155800   | 8.46830100  | -1.01100200  |
| C  | -6.09466700  | -0.63076400 | 3.99114000  | C                                                          | 4.06066300   | 9.46809000  | -1.94417900  |
| C  | -5.40616900  | -0.80989700 | 2.73353900  | C                                                          | 5.90849500   | 7.74166600  | -1.75782500  |
| N  | -5.91687800  | 0.07583100  | 1.78520600  | C                                                          | 3.28898000   | 8.89648700  | 1.76945100   |
| Fe | -5.22338800  | 0.38422600  | -0.08711700 | O                                                          | 2.19885800   | 8.62513200  | 1.17897300   |
| H  | -4.05788100  | -2.31879600 | 3.35311600  | H                                                          | 3.75739000   | 10.61458400 | 0.61920100   |
| H  | -2.07522100  | -1.55183100 | -2.67802700 | H                                                          | 6.07455800   | 9.90733500  | -0.04807600  |
| H  | -6.95268400  | 2.42427500  | -3.72950500 | H                                                          | 5.88801100   | 8.39991700  | 0.84564800   |
| H  | -8.38433000  | 2.32037400  | 2.50844500  | H                                                          | 4.03837700   | 7.71091000  | -0.69787900  |
| O  | -0.52223600  | 3.96944500  | -0.20719600 | H                                                          | 3.73199900   | 8.96833100  | -2.86251700  |
| C  | -0.92267000  | 3.99813000  | -1.46592600 | H                                                          | 3.17358700   | 9.90794900  | -1.47557900  |
| O  | -0.94946500  | 5.06787000  | -2.15008200 | H                                                          | 4.73708400   | 10.28352800 | -2.23309500  |
| C  | -1.34280500  | 2.68526200  | -2.10090800 | H                                                          | 5.52374100   | 7.22222600  | -2.64251300  |
| C  | -0.19930400  | 1.64418700  | -2.10878000 | H                                                          | 6.39331300   | 6.99736000  | -1.11542900  |
| C  | 1.03448000   | 2.07796300  | -2.91958100 | H                                                          | 6.67423500   | 8.45296700  | -2.09414200  |
| C  | 2.15846400   | 1.02554700  | -2.91664900 | N                                                          | 3.61252500   | 8.32204900  | 2.95535000   |
| C  | 3.40728200   | 1.46438900  | -3.70503700 | C                                                          | 2.77107300   | 7.34217600  | 3.65079400   |
| C  | 4.55968900   | 0.43863900  | -3.70530400 | C                                                          | 3.45532000   | 5.96588500  | 3.81516100   |
| C  | 5.23219000   | 0.23703400  | -2.33287600 | C                                                          | 3.83060900   | 5.29764700  | 2.50546100   |
| C  | 6.45293900   | -0.69559200 | -2.39924500 | C                                                          | 2.83770600   | 4.83875500  | 1.61970400   |
| H  | -1.68065700  | 2.89510800  | -3.11933600 | C                                                          | 3.18471400   | 4.24314200  | 0.40084300   |
| H  | -2.19526600  | 2.28000000  | -1.53881800 | C                                                          | 4.53470900   | 4.08950600  | 0.05621300   |
| H  | 0.09762900   | 1.43318300  | -1.07195400 | C                                                          | 5.53085300   | 4.53299800  | 0.93269000   |
| H  | -0.59067000  | 0.70439000  | -2.52051400 | C                                                          | 5.17847500   | 5.13631000  | 2.14693700   |
| H  | 1.42620900   | 3.02400600  | -2.51704800 | H                                                          | 4.49762700   | 8.56723500  | 3.37776000   |
| H  | 0.73210800   | 2.29198500  | -3.95570100 | H                                                          | 1.85350700   | 7.24954500  | 3.06663700   |
| H  | 2.43256500   | 0.80525000  | -1.87364600 | H                                                          | 4.35008100   | 6.07927500  | 4.44199000   |
| H  | 1.78028800   | 0.08181600  | -3.34022200 | H                                                          | 2.76134300   | 5.32978800  | 4.38395500   |
| H  | 3.11697300   | 1.66646900  | -4.74597000 | H                                                          | 1.78633000   | 4.94131800  | 1.88160000   |
| H  | 3.77316400   | 2.42130100  | -3.29877300 | H                                                          | 2.40265700   | 3.90971900  | -0.27477500  |
| H  | 4.18933900   | -0.52612600 | -4.08151800 | H                                                          | 4.80538400   | 3.62291300  | -0.88539600  |
| H  | 5.32218300   | 0.77046900  | -4.42415600 | H                                                          | 6.57823900   | 4.40775000  | 0.67636500   |
| H  | 5.54314000   | 1.21674000  | -1.93710800 | H                                                          | 5.95756200   | 5.47332200  | 2.82609600   |
| H  | 4.50554800   | -0.17088300 | -1.61507400 | C                                                          | 1.22808100   | 0.28457800  | 6.05806800   |
| H  | 7.21554900   | -0.29416100 | -3.07799100 | C                                                          | 0.71677800   | 1.15167200  | 4.95743100   |
| H  | 6.16800000   | -1.68701600 | -2.77340000 | N                                                          | 0.45411100   | 2.52117500  | 5.12087300   |
| O  | -1.40008700  | 5.42375200  | 2.37445300  | C                                                          | 0.00390100   | 3.04943300  | 3.95385100   |
| H  | -1.72921500  | 4.63403600  | 1.88636100  | N                                                          | -0.02938700  | 2.06176300  | 3.05438500   |
| H  | -0.84680000  | 5.96277200  | 1.77538400  | C                                                          | 0.40514300   | 0.88126200  | 3.64675100   |
| O  | -1.89575400  | 2.67574100  | 1.56028800  | H                                                          | 2.20268300   | 0.62660900  | 6.42643100   |
|    |              |             |             | H                                                          | 1.35267500   | -0.73951200 | 5.69873900   |

|   |              |             |              |   |             |              |             |
|---|--------------|-------------|--------------|---|-------------|--------------|-------------|
| H | -0.28055800  | 4.07350400  | 3.73517700   | C | 0.31695500  | -3.78303400  | -8.60801200 |
| H | 0.46007600   | -0.04496200 | 3.10242300   | C | -0.55338200 | -2.68993200  | -8.62314900 |
| H | -0.38039600  | 2.23952300  | 2.02138700   | C | -0.13501000 | -1.45328200  | -8.11315000 |
| C | -9.52017200  | 11.74131200 | -2.39092900  | C | 1.15408000  | -1.32846300  | -7.58604000 |
| C | -9.80538600  | 10.24029000 | -2.18513500  | C | 2.02685800  | -2.42487000  | -7.57505100 |
| C | -8.56313400  | 9.52429400  | -1.60086600  | C | 3.67722500  | -4.62958500  | -5.83445500 |
| C | -8.79603800  | 8.06551300  | -1.17290800  | O | 4.26522200  | -3.70990300  | -5.20249800 |
| C | -10.28555600 | 9.59641800  | -3.50083000  | H | 4.48084500  | -3.98452500  | -7.68243100 |
| H | -8.70943700  | 11.88723600 | -3.11778500  | H | 1.97187700  | -5.77405900  | -7.87780300 |
| H | -10.61741800 | 10.14810900 | -1.44513900  | H | 2.83259500  | -5.04308500  | -9.20827700 |
| H | -7.75261500  | 9.56560700  | -2.34662900  | H | -0.01352600 | -4.73721200  | -9.01097400 |
| H | -8.21185900  | 10.09944900 | -0.73041300  | H | -1.55131700 | -2.79988400  | -9.03629400 |
| H | -9.61172500  | 7.99978500  | -0.44093700  | H | -0.80388300 | -0.59859900  | -8.13312000 |
| H | -9.06443100  | 7.43132300  | -2.02559000  | H | 1.48764400  | -0.37633200  | -7.18430100 |
| H | -7.89465300  | 7.64337200  | -0.71418300  | H | 3.01615900  | -2.30588700  | -7.14812000 |
| H | -11.16475500 | 10.12081500 | -3.89354800  | N | 2.87424100  | -5.53809800  | -5.20816600 |
| H | -10.55900100 | 8.54438100  | -3.36697800  | C | 2.64032100  | -5.55285600  | -3.75369300 |
| H | -9.49817800  | 9.64642500  | -4.26539900  | C | 1.13354500  | -5.72441700  | -3.42690700 |
| C | 9.54793100   | -0.50177000 | -10.11974300 | C | 0.90319900  | -5.73723800  | -1.90371500 |
| C | 8.62776700   | -1.09999200 | -9.07737800  | C | 0.28941600  | -4.62422400  | -4.09631400 |
| C | 7.24950900   | -0.82539100 | -9.08809800  | C | 3.46832000  | -6.72846000  | -3.20332600 |
| C | 6.40241000   | -1.35797700 | -8.10937800  | O | 3.14304400  | -7.90150000  | -3.52126800 |
| C | 6.91657200   | -2.18173400 | -7.09908000  | H | 2.51458300  | -6.33108600  | -5.72333500 |
| C | 8.28887900   | -2.46442300 | -7.08205600  | H | 2.99112400  | -4.59016000  | -3.37993000 |
| C | 9.13338200   | -1.92951200 | -8.06074100  | H | 0.83263400  | -6.70367400  | -3.82572600 |
| H | 10.38736700  | -1.16903100 | -10.34332900 | H | 1.41648600  | -6.56240200  | -1.40237600 |
| H | 9.97339800   | 0.45169400  | -9.77732200  | H | -0.16560200 | -5.84837700  | -1.68467000 |
| H | 6.83924100   | -0.19232000 | -9.87056500  | H | 1.24042800  | -4.79635400  | -1.44732500 |
| H | 5.33981700   | -1.13324600 | -8.13794000  | H | -0.77575500 | -4.79888100  | -3.89960800 |
| H | 6.25528700   | -2.60032500 | -6.34632500  | H | 0.43174500  | -4.59491400  | -5.18028500 |
| H | 8.70035800   | -3.10681800 | -6.30890400  | H | 0.55448700  | -3.63491000  | -3.69899300 |
| H | 10.19554800  | -2.15929600 | -8.04113500  | N | 4.57488200  | -6.46458700  | -2.44294200 |
| C | -4.60455200  | 9.33671600  | 0.05724100   | C | 5.56416000  | -7.53943100  | -2.18001800 |
| C | -3.28227600  | 9.39864000  | -0.75462900  | C | 6.90922700  | -6.78250900  | -2.17487200 |
| C | -3.29996900  | 8.52932700  | -2.02654800  | C | 6.53765400  | -5.41037000  | -1.57149600 |
| C | -1.91863600  | 8.36864300  | -2.69479600  | C | 5.13688200  | -5.10888800  | -2.14864600 |
| N | -1.02947700  | 7.44535700  | -1.97259700  | C | 5.35916200  | -8.30603900  | -0.86772700 |
| C | -0.12281500  | 7.76077000  | -1.04168800  | O | 6.21784600  | -9.13924900  | -0.48801200 |
| N | 0.17071400   | 9.04020600  | -0.70608100  | H | 5.49468400  | -8.28062500  | -2.98162200 |
| N | 0.52845100   | 6.76967300  | -0.38746300  | H | 7.66308500  | -7.32471800  | -1.60121300 |
| C | -4.78923500  | 7.99287800  | 0.74407200   | H | 7.27023400  | -6.66599400  | -3.20289800 |
| O | -5.43195000  | 7.05670000  | 0.18326200   | H | 6.49456300  | -5.48091700  | -0.47818200 |
| H | -5.45811300  | 9.47605700  | -0.61275100  | H | 7.25458200  | -4.62506400  | -1.82681700 |
| H | -2.45212300  | 9.09018700  | -0.10679900  | H | 5.19404200  | -4.52043600  | -3.07031400 |
| H | -3.09352700  | 10.44559200 | -1.03326200  | H | 4.50239100  | -4.57424800  | -1.43405400 |
| H | -3.68934000  | 7.53110500  | -1.79665000  | N | 4.23083900  | -8.05238400  | -0.16050200 |
| H | -3.98866600  | 8.97451600  | -2.75792200  | C | 3.91982800  | -8.79549900  | 1.04376800  |
| H | -2.04561400  | 7.94312800  | -3.69461800  | C | 2.53416600  | -8.39086900  | 1.53589900  |
| H | -1.43288300  | 9.34447200  | -2.83485200  | O | 1.90945300  | -7.43206100  | 1.01351200  |
| H | -1.07885400  | 6.44043300  | -2.26833100  | H | 3.54150900  | -7.37963600  | -0.47040700 |
| H | -0.25733000  | 9.81573100  | -1.17991400  | H | 3.96285400  | -9.87497500  | 0.84535300  |
| H | 0.91471800   | 9.20442500  | -0.02803000  | N | 2.04865600  | -9.12475900  | 2.57254200  |
| H | 0.41777600   | 5.77657800  | -0.68703200  | C | 0.73939400  | -8.88202100  | 3.19572500  |
| H | 1.30852100   | 7.03227300  | 0.20651100   | C | -0.26766500 | -10.02405800 | 2.96666700  |
| N | -4.20460400  | 7.81121400  | 1.95925500   | C | -0.65879300 | -10.29326100 | 1.49454300  |
| C | -4.31607400  | 6.51583400  | 2.67836500   | C | -1.57806700 | -11.52885800 | 1.41437400  |
| C | -3.81504800  | 6.84551800  | 4.09471000   | C | -1.32313300 | -9.06982600  | 0.83150700  |
| C | -2.78688300  | 7.97235300  | 3.85413400   | H | 2.59701800  | -9.90203600  | 2.91617800  |
| C | -3.43210300  | 8.81397100  | 2.73546000   | H | 0.37175300  | -7.94187400  | 2.78001000  |
| H | -3.67712000  | 5.76820700  | 2.19473400   | H | 0.13637400  | -10.94987000 | 3.40408500  |
| H | -4.64004700  | 7.20831900  | 4.71986400   | H | -1.17628500 | -9.78654300  | 3.54104600  |
| H | -3.37506700  | 5.97307600  | 4.58500700   | H | 0.26232000  | -10.52183700 | 0.93673100  |
| H | -2.57791100  | 8.56697400  | 4.74803700   | H | -1.82442400 | -11.76730900 | 0.37352800  |
| H | -1.84772300  | 7.53385100  | 3.49767500   | H | -2.52057600 | -11.34915800 | 1.94862300  |
| H | -2.68809800  | 9.31387200  | 2.10952100   | H | -1.10322000 | -12.41204600 | 1.85905400  |
| H | -4.10238300  | 9.57972100  | 3.14973800   | H | -1.64179700 | -9.31434800  | -0.18867300 |
| C | -0.85539700  | 5.81463800  | -7.17753800  | H | -0.63626000 | -8.21955700  | 0.76832500  |
| C | -2.07591600  | 5.80988900  | -6.24542900  | H | -2.21575300 | -8.76114000  | 1.39346200  |
| H | -0.04621900  | 6.43283400  | -6.77007000  | C | -8.33484300 | -1.58033000  | -1.26446700 |
| H | -1.82028800  | 5.41739000  | -5.25451600  | C | -6.81638700 | -1.36394300  | -1.32994600 |
| H | -2.47869400  | 6.82408700  | -6.11928700  | S | -6.40435200 | 0.40643200   | -1.87213500 |
| H | -2.88272300  | 5.19046700  | -6.65726700  | C | -9.00844700 | -1.33547600  | -2.60673000 |
| C | 3.84867700   | -4.80582500 | -7.33742800  | O | -8.66003200 | -1.94582800  | -3.64856000 |
| C | 2.54393400   | -4.87840800 | -8.15984200  | H | -8.76991400 | -0.94552400  | -0.48458000 |
| C | 1.62192300   | -3.66723000 | -8.09156300  | H | -6.36467400 | -1.53074300  | -0.34868100 |



|   |              |             |             |   |             |              |              |
|---|--------------|-------------|-------------|---|-------------|--------------|--------------|
| C | 1.12779200   | 1.48727100  | 2.86132300  | C | 4.37033300  | -3.49767000  | -6.27311300  |
| H | 2.95164500   | 1.29683800  | 5.62694700  | C | 3.55838700  | -3.84521100  | -7.53701400  |
| H | 2.14335500   | -0.09773000 | 4.90542800  | C | 2.23329600  | -3.11636200  | -7.72340400  |
| H | 0.31280700   | 4.64726900  | 2.95472600  | C | 1.50766500  | -3.33716800  | -8.90994300  |
| H | 1.21504500   | 0.56441000  | 2.31456900  | C | 0.29652000  | -2.68380000  | -9.14749000  |
| H | 0.26963400   | 2.80408800  | 1.24409700  | C | -0.21677300 | -1.79035100  | -8.19774900  |
| C | -9.88954100  | 10.89064300 | -2.58697700 | C | 0.49086400  | -1.56469000  | -7.01409100  |
| C | -9.34581600  | 9.44137700  | -2.06197600 | C | 1.70674000  | -2.22282900  | -6.77632100  |
| C | -8.40029000  | 9.00524200  | -1.76427500 | C | 3.78025100  | -3.91762200  | -4.93073200  |
| C | -8.25890200  | 7.64120900  | -1.06819000 | O | 3.76572400  | -3.13015800  | -3.94394900  |
| C | -10.55955800 | 8.49165100  | -3.05124800 | H | 4.54834600  | -2.42081200  | -6.21658500  |
| H | -9.34508100  | 10.97165100 | -3.53753400 | H | 3.37964800  | -4.53072300  | -7.58533400  |
| H | -10.41049400 | 9.41262000  | -1.10957300 | H | 4.19758400  | -3.62812900  | -8.40405700  |
| H | -7.83647700  | 8.99617600  | -2.71080400 | H | 1.90107300  | -4.02493500  | -9.65439100  |
| H | -7.93197600  | 9.77692900  | -1.13381200 | H | -0.24398200 | -2.86708100  | -10.07083600 |
| H | -8.82820000  | 7.62184000  | -0.12923100 | H | -1.15485900 | -1.27640800  | -8.38244400  |
| H | -8.62986300  | 6.82497600  | -1.69848300 | H | 0.09781000  | -0.87899400  | -6.27007000  |
| H | -7.20951500  | 7.42985200  | -0.83429200 | H | 2.23156800  | -2.03752900  | -5.84542700  |
| H | -11.58378800 | 8.82709700  | -3.25308700 | N | 3.32169800  | -5.19797000  | -4.84230100  |
| H | -10.61537100 | 7.46749800  | -2.66702000 | C | 2.84376600  | -5.80968700  | -3.58967000  |
| H | -10.02256300 | 8.46393800  | -4.00915600 | C | 1.38883000  | -6.33525600  | -3.70993900  |
| C | 6.06865800   | 4.13704300  | -5.73208700 | C | 0.92155300  | -6.93435000  | -2.36977100  |
| C | 5.64970800   | 2.76369400  | -5.25319000 | C | 0.43324000  | -5.21976400  | -4.17159600  |
| C | 4.55503500   | 2.10144100  | -5.83570200 | C | 3.83578600  | -6.94929600  | -3.30081600  |
| C | 4.19039200   | 0.81420300  | -5.42392000 | O | 3.88316800  | -7.92702800  | -4.09161500  |
| C | 4.91134200   | 0.16026600  | -4.41430800 | H | 3.41032700  | -5.82719300  | -5.62976300  |
| C | 6.00085600   | 0.81432400  | -3.82407000 | H | 2.88095700  | -5.02367100  | -2.83506700  |
| C | 6.36439300   | 2.10145500  | -4.23880300 | H | 1.39837700  | -7.13548100  | -4.46325800  |
| H | 6.55111200   | 4.71210300  | -4.93395700 | H | 1.51593500  | -7.79635900  | -2.05379500  |
| H | 5.21046600   | 4.71336700  | -6.09486000 | H | -0.11710300 | -7.27482500  | -2.44723200  |
| H | 3.99049000   | 2.59584500  | -6.62205700 | H | 0.96363100  | -6.17867500  | -1.57227900  |
| H | 3.34777500   | 0.31788100  | -5.89671900 | H | -0.58266300 | -5.61796100  | -4.28018000  |
| H | 4.62942900   | -0.84176200 | -4.10225400 | H | 0.73458700  | -4.79222900  | -5.13222900  |
| H | 6.57105200   | 0.31927900  | -3.04344800 | H | 0.40349100  | -4.40389300  | -3.43607800  |
| H | 7.22001300   | 2.59371000  | -3.78263100 | N | 4.69463300  | -6.83144500  | -2.24257500  |
| C | -4.10827100  | 9.73884300  | -0.99938100 | C | 5.86205000  | -7.74137100  | -2.12605100  |
| C | -2.81972200  | 9.81394300  | -1.86555800 | C | 6.95239600  | -6.83263900  | -1.52114000  |
| C | -2.82954400  | 8.82012900  | -3.04419500 | C | 6.14895800  | -5.89836900  | -0.58999800  |
| C | -1.45560000  | 8.61609700  | -3.71548600 | C | 4.83726900  | -5.63206300  | -1.36127700  |
| N | -0.58458300  | 7.69315800  | -2.97218700 | C | 5.63714300  | -8.98101300  | -1.24913400  |
| C | 0.33914900   | 8.00803800  | -2.06058300 | O | 6.60785500  | -9.71875200  | -0.94953600  |
| N | 0.67085400   | 9.28685100  | -1.75889600 | H | 6.11643200  | -8.11032800  | -3.12400500  |
| N | 0.97371600   | 7.01494800  | -1.39089000 | H | 7.71062900  | -7.42255500  | -1.00326300  |
| C | -4.10010200  | 8.51197300  | -0.10170100 | H | 7.43923100  | -6.25783700  | -2.31716500  |
| O | -4.57407400  | 7.40804100  | -0.50338200 | H | 5.93706900  | -6.40696000  | 0.35779500   |
| H | -4.98637200  | 9.66216500  | -1.64791700 | H | 6.67749400  | -4.96914200  | -0.35925100  |
| H | -1.94972400  | 9.62473100  | -1.22293400 | H | 4.90394500  | -4.72326000  | -1.96937900  |
| H | -2.71188800  | 10.83674700 | -2.25348500 | H | 3.97513200  | -5.53662200  | -0.69383200  |
| H | -3.18978500  | 7.84304700  | -2.70393700 | N | 4.37336300  | -9.23255700  | -0.83344200  |
| H | -3.54091100  | 9.17407300  | -3.80289400 | C | 4.05324600  | -10.41549900 | -0.06035200  |
| H | -1.59590500  | 8.16466200  | -4.70207100 | C | 2.55877500  | -10.41104600 | 0.24967700   |
| H | -0.95024500  | 9.57709900  | -3.88550700 | O | 1.82265000  | -9.45764900  | -0.11228800  |
| H | -0.66637500  | 6.67885900  | -3.23522900 | H | 3.59691900  | -8.63008900  | -1.07556400  |
| H | 0.25654700   | 10.06116600 | -2.24676200 | H | 4.32601000  | -11.32428200 | -0.61506700  |
| H | 1.43030700   | 9.44728600  | -1.09687400 | N | 2.10269300  | -11.49078400 | 0.93710300   |
| H | 0.83644100   | 6.02160200  | -1.66806100 | C | 0.69503900  | -11.67116100 | 1.32456500   |
| H | 1.77189600   | 7.26882600  | -0.81764600 | C | 0.00813800  | -12.84146700 | 0.59728300   |
| N | -3.51931400  | 8.62402900  | 1.12297000  | C | -0.10049800 | -12.70831400 | -0.93998700  |
| C | -3.43701800  | 7.46271600  | 2.04790200  | C | -0.68640300 | -14.00333300 | -1.53813800  |
| C | -3.05328100  | 8.10302400  | 3.39390400  | C | -0.93288300 | -11.48187700 | -1.36527000  |
| C | -2.22873700  | 9.34322600  | 2.98262100  | H | 2.75412000  | -12.22738000 | 1.17397400   |
| C | -2.95111700  | 9.85801400  | 1.72236900  | H | 0.19379900  | -10.72487200 | 1.11276300   |
| H | -2.66731900  | 6.76141300  | 1.70257800  | H | 0.54127900  | -13.77391400 | 0.83884400   |
| H | -3.95120600  | 8.41112600  | 3.94316500  | H | -1.00232100 | -12.94963500 | 1.02018700   |
| H | -2.48953400  | 7.41437900  | 4.02928700  | H | 0.91751900  | -12.58205400 | -1.34011100  |
| H | -2.17622300  | 10.10451300 | 3.76599000  | H | -0.72716600 | -13.94669100 | -2.63187700  |
| H | -1.20423300  | 9.04462600  | 2.72947200  | H | -1.70834000 | -14.17289400 | -1.17375000  |
| H | -2.26934700  | 10.35889000 | 1.02913500  | H | -0.08392900 | -14.87929600 | -1.26792200  |
| H | -3.75225100  | 10.56249000 | 1.98424200  | H | -1.03908400 | -11.45222600 | -2.45612200  |
| C | -0.91877400  | 6.46219800  | -7.97399300 | H | -0.46331400 | -10.54321800 | -1.05392500  |
| C | -2.05799200  | 6.01019600  | -7.04796900 | H | -1.94262700 | -11.52902200 | -0.93454200  |
| H | -0.31425500  | 7.25023600  | -7.50768500 | C | -8.04505800 | -0.81138700  | -0.32286300  |
| H | -1.67171900  | 5.61921300  | -6.09925800 | C | -6.53393600 | -0.84987600  | -0.58657300  |
| H | -2.73822200  | 6.84365200  | -6.82335100 | S | -5.96716200 | 0.67889800   | -1.55011200  |
| H | -2.65763900  | 5.22187800  | -7.52051600 | C | -8.84252300 | -0.72322100  | -1.61535100  |





|   |              |             |             |   |             |              |             |
|---|--------------|-------------|-------------|---|-------------|--------------|-------------|
| N | 0.73440700   | 2.40130500  | 4.49940400  | H | -2.00910100 | 5.42453400   | -5.49723600 |
| C | 0.25218400   | 3.01637400  | 3.38819200  | H | -3.46921300 | 6.28004700   | -6.03201300 |
| N | 0.18271900   | 2.10008100  | 2.41875000  | H | -3.03109400 | 4.73606000   | -6.77220100 |
| C | 0.62635600   | 0.87705200  | 2.90923900  | C | 3.87092700  | -4.51616900  | -7.20225000 |
| H | 2.51179000   | 0.40669300  | 5.60089400  | C | 2.58661000  | -4.52480300  | -8.05757400 |
| H | 1.62768900   | -0.89729200 | 4.80358000  | C | 1.67866600  | -3.30536400  | -7.94967700 |
| H | -0.03128600  | 4.05493000  | 3.25672800  | C | 0.51678000  | -3.26369300  | -8.74466200 |
| H | 0.65583200   | -0.00675300 | 2.29653900  | C | -0.33892400 | -2.16020100  | -8.71590200 |
| H | -0.19815700  | 2.36412800  | 1.39683500  | C | -0.04929400 | -1.06888200  | -7.88494800 |
| C | -9.74067600  | 11.71038900 | -2.55559300 | C | 1.09630100  | -1.10116100  | -7.08479000 |
| C | -9.77598500  | 10.16924400 | -2.53871600 | C | 1.95516200  | -2.20947900  | -7.11498000 |
| C | -8.55253700  | 9.60550800  | -1.77500600 | C | 3.68089900  | -4.56307100  | -5.69075000 |
| C | -8.58370500  | 8.08722000  | -1.53169700 | O | 4.25654300  | -3.74177400  | -4.92533600 |
| C | -9.87622100  | 9.61535700  | -3.97368100 | H | 4.47129600  | -3.62934400  | -7.41901900 |
| H | -8.85156100  | 12.07277500 | -3.08955400 | H | 1.99708300  | -5.42844500  | -7.84110000 |
| H | -10.67953100 | 9.85683700  | -1.98976400 | H | 2.89615100  | -4.63354900  | -9.10642900 |
| H | -7.63972700  | 9.87316200  | -2.33239300 | H | 0.28840600  | -4.10198900  | -9.39818700 |
| H | -8.48348800  | 10.12061800 | -0.80498800 | H | -1.22363800 | -2.14662900  | -9.34493000 |
| H | -9.49107300  | 7.79852700  | -0.98543900 | H | -0.70580800 | -0.20480300  | -7.86741400 |
| H | -8.57306900  | 7.52655000  | -2.47363900 | H | 1.33144900  | -0.26203300  | -6.43671400 |
| H | -7.71775500  | 7.76427800  | -0.94235800 | H | 2.83308300  | -2.21065300  | -6.47882800 |
| H | -10.74763200 | 10.03207800 | -4.49255700 | N | 2.88320100  | -5.56084300  | -5.21181500 |
| H | -9.97344300  | 8.52449400  | -3.98708300 | C | 2.64821300  | -5.80127800  | -3.77674400 |
| H | -8.98292200  | 9.88268400  | -4.55492400 | C | 1.13306900  | -5.86586300  | -3.44830300 |
| C | 8.68990900   | 1.44736800  | -8.86665700 | C | 0.91156400  | -6.12000100  | -1.94519800 |
| C | 7.90660200   | 0.47704200  | -8.00872000 | C | 0.41167000  | -4.58243200  | -3.89852700 |
| C | 6.51171100   | 0.36360200  | -8.13653000 | C | 3.34393500  | -7.13670300  | -3.46056300 |
| C | 5.79063300   | -0.55561500 | -7.36535100 | O | 2.87459400  | -8.19652200  | -3.95024800 |
| C | 6.45151400   | -1.38171800 | -6.44607000 | H | 2.51444700  | -6.26106000  | -5.84236700 |
| C | 7.84196000   | -1.27333300 | -6.30901000 | H | 3.10274000  | -4.96114600  | -3.25025000 |
| C | 8.55963500   | -0.35303800 | -7.08041200 | H | 0.72539200  | -6.72217000  | -4.00371700 |
| H | 9.57794600   | 1.81861100  | -8.34354600 | H | 1.33462600  | -7.07070600  | -1.60958800 |
| H | 8.08061900   | 2.31103300  | -9.15411400 | H | -0.16118900 | -6.15034900  | -1.72036900 |
| H | 5.98898800   | 0.99984700  | -8.84606400 | H | 1.35639800  | -5.31852900  | -1.33963300 |
| H | 4.71305800   | -0.62781200 | -7.48360400 | H | -0.66604100 | -4.67770500  | -3.71497500 |
| H | 5.89192500   | -2.09543600 | -5.84830400 | H | 0.55733700  | -4.38035700  | -4.96366900 |
| H | 8.36704800   | -1.90668000 | -5.59980900 | H | 0.77913100  | -3.71119100  | -3.33925600 |
| H | 9.63771100   | -0.27633300 | -6.96469900 | N | 4.49317500  | -7.12699200  | -2.71893700 |
| C | -4.49628200  | 9.39342500  | -0.04539700 | C | 5.34240000  | -8.34253600  | -2.65257000 |
| C | -3.20429200  | 9.46147100  | -0.90299800 | C | 6.77331600  | -7.76575900  | -2.60751200 |
| C | -3.24829500  | 8.57879500  | -2.16506600 | C | 6.60001300  | -6.46021200  | -1.80154100 |
| C | -1.89411300  | 8.47218400  | -2.89865200 | C | 5.22994800  | -5.90932800  | -2.25673500 |
| N | -0.93643600  | 7.57019700  | -2.23959700 | C | 5.07705300  | -9.25046200  | -1.44460000 |
| C | -0.02191700  | 7.89737100  | -1.31998600 | O | 5.82415500  | -10.23460800 | -1.22455800 |
| N | 0.20990300   | 9.17587500  | -0.93596100 | H | 5.15374100  | -8.94968500  | -3.54248300 |
| N | 0.70158700   | 6.91700100  | -0.72798000 | H | 7.46853300  | -8.47317700  | -2.15186700 |
| C | -4.65259900  | 8.05048600  | 0.65028600  | H | 7.11503600  | -7.54817100  | -3.62570700 |
| O | -5.34027300  | 7.12328200  | 0.12916500  | H | 6.58490000  | -6.68148200  | -0.72799500 |
| H | -5.37421500  | 9.52741200  | -0.68411500 | H | 7.40297600  | -5.73999900  | -1.98106200 |
| H | -2.34848300  | 9.17255300  | -0.28091700 | H | 5.33046600  | -5.19584800  | -3.08124800 |
| H | -3.04041100  | 10.50775800 | -1.20041900 | H | 4.69187100  | -5.41729300  | -1.43976800 |
| H | -3.58697700  | 7.56787800  | -1.91056000 | N | 4.02330500  | -8.94352400  | -0.64950500 |
| H | -3.98821400  | 8.99040200  | -2.86545900 | C | 3.66128400  | -9.78064300  | 0.47614200  |
| H | -2.05411400  | 8.05653500  | -3.89777900 | C | 2.43496500  | -9.18498300  | 1.16101000  |
| H | -1.45104200  | 9.46756600  | -3.04692800 | O | 1.93169600  | -8.10069800  | 0.76860500  |
| H | -0.90593200  | 6.58638100  | -2.60481100 | H | 3.42762800  | -8.14508400  | -0.82845600 |
| H | -0.27142400  | 9.94519100  | -1.36705800 | H | 3.45290700  | -10.80672100 | 0.14179200  |
| H | 0.96086100   | 9.35295300  | -0.26871500 | N | 1.94745000  | -9.90070400  | 2.20898800  |
| H | 0.64416900   | 5.93306900  | -1.07332400 | C | 0.77827200  | -9.48750400  | 2.99896300  |
| H | 1.48235300   | 7.19702800  | -0.14302300 | C | -0.43202800 | -10.42570600 | 2.83876900  |
| N | -3.99620500  | 7.85960600  | 1.82672800  | C | -1.02450600 | -10.52589100 | 1.41353900  |
| C | -4.07095600  | 6.55977400  | 2.54234700  | C | -2.14122700 | -11.58879800 | 1.38238800  |
| C | -3.47667900  | 6.87376200  | 3.92583000  | C | -1.54384100 | -9.16873900  | 0.89718600  |
| C | -2.46006900  | 7.99699800  | 3.62809200  | H | 2.39505300  | -10.77483200 | 2.45094200  |
| C | -3.17302300  | 8.85250100  | 2.56233500  | H | 0.53663700  | -8.47192100  | 2.67994800  |
| H | -3.47075300  | 5.81204900  | 2.01169800  | H | -0.14970500 | -11.43348400 | 3.17987600  |
| H | -4.25663900  | 7.23462200  | 4.60747300  | H | -1.21551500 | -10.07810700 | 3.52948200  |
| H | -3.01019300  | 5.99443100  | 4.37790400  | H | -0.22232200 | -10.86048400 | 0.73778900  |
| H | -2.18839500  | 8.58194600  | 4.51150900  | H | -2.54065500 | -11.70780200 | 0.36876700  |
| H | -1.55007400  | 7.55610200  | 3.20518000  | H | -2.97370200 | -11.30001500 | 2.03797600  |
| H | -2.46885700  | 9.35759100  | 1.89631000  | H | -1.77434600 | -12.56686000 | 1.71685300  |
| H | -3.81382500  | 9.61464200  | 3.02691200  | H | -2.00571000 | -9.28759900  | -0.09009300 |
| C | -1.80190600  | 6.41251600  | -7.44051900 | H | -0.73664800 | -8.43556400  | 0.79907800  |
| C | -2.62055400  | 5.67208300  | -6.37262000 | H | -2.30796100 | -8.76269100  | 1.57471300  |
| H | -1.39046800  | 7.35109500  | -7.04849700 | C | -8.11169600 | -1.67677800  | -0.74969400 |



|   |              |             |             |   |             |              |             |
|---|--------------|-------------|-------------|---|-------------|--------------|-------------|
| H | 6.47938200   | 5.87708800  | 1.98182500  | C | -1.49819300 | 6.32594300   | -7.96026500 |
| C | 2.07824500   | 0.96600300  | 5.24116100  | C | -2.33833900 | 5.60433200   | -6.89589900 |
| C | 1.50925600   | 1.80236200  | 4.14506800  | H | -1.05227500 | 7.24654500   | -7.56239300 |
| N | 1.17241000   | 3.15549100  | 4.31022100  | H | -1.73293400 | 5.32671700   | -6.02538300 |
| C | 0.68360300   | 3.65502300  | 3.14494700  | H | -3.16488800 | 6.23840300   | -6.54787200 |
| N | 0.69937000   | 2.66704800  | 2.24686900  | H | -2.78208400 | 4.68737900   | -7.30338900 |
| C | 1.20211500   | 1.51325900  | 2.83720200  | C | 4.30724100  | -3.16090500  | -6.25003800 |
| H | 3.04055100   | 1.35606400  | 5.59420500  | C | 3.48467500  | -3.41551100  | -7.52895300 |
| H | 2.24709000   | -0.05202200 | 4.88255800  | C | 2.12814900  | -2.72793400  | -7.62234700 |
| H | 0.33665100   | 4.65848500  | 2.92651200  | C | 1.34111700  | -2.94816300  | -8.76907000 |
| H | 1.30216900   | 0.59073800  | 2.29221200  | C | 0.10056300  | -2.32552200  | -8.92331600 |
| H | 0.31615300   | 2.81577800  | 1.21029600  | C | -0.38207400 | -1.46618000  | -7.92716800 |
| C | -9.40546900  | 10.53279100 | -3.90437600 | C | 0.38625800  | -1.24227100  | -6.78187600 |
| C | -9.50892500  | 9.17774600  | -3.17630800 | C | 1.63254700  | -1.86746400  | -6.62906000 |
| C | -8.15420500  | 8.80672800  | -2.52463000 | C | 3.73111300  | -3.68615800  | -4.93882400 |
| C | -8.18676900  | 7.56779900  | -1.61421500 | O | 3.72683500  | -2.97862600  | -3.89280000 |
| C | -10.01278400 | 8.08400000  | -4.13857600 | H | 4.48169300  | -2.09108500  | -6.11234600 |
| H | -8.67286600  | 10.47957000 | -4.72118800 | H | 3.34772000  | -4.49654700  | -7.68242000 |
| H | -10.24780200 | 9.28423100  | -2.36504400 | H | 4.09974500  | -3.08859700  | -8.37939800 |
| H | -7.41076900  | 8.65684000  | -3.32416600 | H | 1.70879000  | -3.61197400  | -9.54764400 |
| H | -7.80650400  | 9.67120600  | -1.93808200 | H | -0.48792200 | -2.50815100  | -9.81698800 |
| H | -8.92782700  | 7.69118900  | -0.81343000 | H | -1.34455400 | -0.97871300  | -8.04570700 |
| H | -8.44915500  | 6.66222000  | -2.17298600 | H | 0.01934600  | -0.58381200  | -6.00080500 |
| H | -7.20869500  | 7.39866900  | -1.14976500 | H | 2.20464700  | -1.68542800  | -5.72592700 |
| H | -10.96929800 | 8.37211700  | -4.59051600 | N | 3.27467500  | -4.96952500  | -4.95134100 |
| H | -10.16209200 | 7.12603500  | -3.62912900 | C | 2.80342600  | -5.68966100  | -3.75522300 |
| H | -9.29326000  | 7.92473400  | -4.95327300 | C | 1.35133700  | -6.21032200  | -3.92964900 |
| C | 6.47628300   | 4.22372700  | -5.51629900 | C | 0.89754000  | -6.99443200  | -2.68422000 |
| C | 5.97049500   | 2.87224500  | -5.05967300 | C | 0.38341600  | -5.05089300  | -4.22980600 |
| C | 4.86584500   | 2.26702700  | -5.68385600 | C | 3.79934800  | -6.84616100  | -3.56613100 |
| C | 4.42197800   | 0.99886600  | -5.28986100 | O | 3.86151200  | -7.74172900  | -4.44760200 |
| C | 5.07221700   | 0.30785300  | -4.25746800 | H | 3.36131100  | -5.53113200  | -5.78873100 |
| C | 6.17101600   | 0.90507700  | -3.62556100 | H | 2.83518900  | -4.97335700  | -2.93392100 |
| C | 6.61336400   | 2.17308800  | -4.02194200 | H | 1.36236000  | -6.90066600  | -4.78492500 |
| H | 6.90320300   | 4.79614900  | -4.68496600 | H | 1.50463300  | -7.88463500  | -2.49880400 |
| H | 5.67425000   | 4.82096200  | -5.96321300 | H | -0.13780000 | -7.33213600  | -2.80537700 |
| H | 4.35663300   | 2.79001000  | -6.48920400 | H | 0.93520200  | -6.36536100  | -1.78411000 |
| H | 3.56937300   | 0.54939200  | -5.79073600 | H | -0.62802700 | -5.44055400  | -4.39628600 |
| H | 4.72952900   | -0.67921500 | -3.95899600 | H | 0.68057300  | -4.48707500  | -5.11892800 |
| H | 6.68698100   | 0.38051500  | -2.82673400 | H | 0.34367300  | -4.34980500  | -3.38469700 |
| H | 7.47471500   | 2.62093800  | -3.53212800 | N | 4.63969100  | -6.83223200  | -2.48643600 |
| C | -4.15097000  | 9.65847200  | -1.13900100 | C | 5.79550300  | -7.76269400  | -2.43563400 |
| C | -2.86465300  | 9.70581200  | -2.00960100 | C | 6.87969700  | -6.93275400  | -1.71435900 |
| C | -2.85066700  | 8.64309400  | -3.12679100 | C | 6.06314900  | -6.07595300  | -0.72238100 |
| C | -1.47477500  | 8.44297800  | -3.79647000 | C | 4.77972000  | -5.71587700  | -1.50202500 |
| N | -0.57160700  | 7.57960300  | -3.01969300 | C | 5.53470800  | -9.08310300  | -1.69883600 |
| C | 0.32802100   | 7.96176100  | -2.10810700 | O | 6.47505800  | -9.89667900  | -1.52786700 |
| N | 0.59993600   | 9.26268800  | -1.84353100 | H | 6.07383700  | -8.03170000  | -3.45836400 |
| N | 0.99839400   | 7.01987400  | -1.40237100 | H | 7.61607400  | -7.57939700  | -1.23371000 |
| C | -4.12345500  | 8.47911600  | -0.18036500 | H | 7.39759500  | -6.29379200  | -2.43871500 |
| O | -4.60162000  | 7.35519600  | -0.51632600 | H | 5.81540500  | -6.66599100  | 0.16771200  |
| H | -5.02946900  | 9.53843500  | -1.77998700 | H | 6.59869000  | -5.18172200  | -0.39136800 |
| H | -1.99254800  | 9.57349200  | -1.35613200 | H | 4.88250000  | -4.76035200  | -2.02820600 |
| H | -2.77746000  | 10.70530700 | -2.45893600 | H | 3.90235500  | -5.65634900  | -0.85070400 |
| H | -3.17970600  | 7.67700600  | -2.72811800 | N | 4.27757600  | -9.31344800  | -1.25025100 |
| H | -3.57664600  | 8.93041100  | -3.89973800 | C | 3.92603300  | -10.55519200 | -0.59113700 |
| H | -1.60789500  | 7.94151400  | -4.75951600 | C | 2.45865200  | -10.49210700 | -0.17583700 |
| H | -0.99691000  | 9.40834300  | -4.01574300 | O | 1.76657400  | -9.46397400  | -0.39181300 |
| H | -0.59192900  | 6.56043700  | -3.26756200 | H | 3.52744900  | -8.64626200  | -1.38106300 |
| H | 0.16130200   | 10.00268100 | -2.36240300 | H | 4.09618600  | -11.41018500 | -1.26074000 |
| H | 1.33714900   | 9.47661300  | -1.17142600 | N | 1.97604600  | -11.60639800 | 0.43399900  |
| H | 0.91615900   | 6.01265700  | -1.65271800 | C | 0.58888000  | -11.73696200 | 0.90572700  |
| H | 1.77349100   | 7.32841700  | -0.82422400 | C | -0.22699600 | -12.78438300 | 0.12604600  |
| N | -3.51825800  | 8.65317500  | 1.02515500  | C | -0.42749000 | -12.49823000 | -1.38077800 |
| C | -3.40692900  | 7.53641200  | 2.00052800  | C | -1.15601800 | -13.68278700 | -2.04725700 |
| C | -3.00505600  | 8.24081500  | 3.30860600  | C | -1.18367200 | -11.17764700 | -1.63029200 |
| C | -2.20417900  | 9.47124300  | 2.82713100  | H | 2.59118900  | -12.40013300 | 0.55488500  |
| C | -2.95519100  | 9.91957400  | 1.55794700  | H | 0.14131000  | -10.74482900 | 0.82238000  |
| H | -2.63812100  | 6.82569500  | 1.67227100  | H | 0.25109900  | -13.76912600 | 0.24276900  |
| H | -3.89603500  | 8.56289000  | 3.86111100  | H | -1.21277100 | -12.86407400 | 0.60916000  |
| H | -2.42096200  | 7.58781000  | 3.96294200  | H | 0.56787500  | -12.41201200 | -1.84349500 |
| H | -2.14871700  | 10.26796300 | 3.57424500  | H | -1.26463000 | -13.51951700 | -3.12554200 |
| H | -1.17997200  | 9.17547700  | 2.56946400  | H | -2.16195500 | -13.80929300 | -1.62529900 |
| H | -2.29255900  | 10.39683700 | 0.83054900  | H | -0.61033100 | -14.62319500 | -1.90187200 |
| H | -3.76083500  | 10.62521400 | 1.80239000  | H | -1.36012800 | -11.03518800 | -2.70309400 |

|    |              |              |             |   |              |              |             |
|----|--------------|--------------|-------------|---|--------------|--------------|-------------|
| H  | -0.61954900  | -10.31135600 | -1.26962800 | H | 3.69562000   | -0.34587900  | -1.28664300 |
| H  | -2.16267200  | -11.19099200 | -1.13161000 | H | 2.65454600   | 0.07189500   | 0.06948800  |
| C  | -8.04910900  | -0.76594500  | 0.24766600  | H | 2.81837000   | -2.69563400  | -1.25412200 |
| C  | -6.54284800  | -0.83545000  | -0.03772100 | H | 3.67760000   | -2.23960200  | 0.21401800  |
| S  | -6.00077400  | 0.60480400   | -1.14400500 | H | 1.48514900   | -1.80915400  | 1.37696600  |
| C  | -8.87395100  | -0.77437900  | -1.03090200 | H | 0.61806700   | -2.33090900  | -0.05930500 |
| O  | -8.72298600  | -1.65185300  | -1.91743900 | H | 2.53745600   | -4.10770600  | 1.57659400  |
| H  | -8.27404000  | 0.11979900   | 0.85239900  | H | 1.64847200   | -4.62942200  | 0.13611100  |
| H  | -5.97383700  | -0.78533200  | 0.89405100  | O | -0.35428100  | 5.63250000   | 1.22000300  |
| H  | -6.28935200  | -1.76054300  | -0.56075200 | H | -0.59457500  | 4.78489500   | 0.74593500  |
| N  | -9.77034200  | 0.24942300   | -1.17716400 | H | -0.12012400  | 6.30743700   | 0.55115300  |
| C  | -10.67652200 | 0.33363500   | -2.32051600 | O | -0.33768300  | 3.21157000   | 0.01354900  |
| C  | -10.04736900 | 0.74606000   | -3.65581600 | H | -1.03883400  | 2.50683700   | -0.33086600 |
| O  | -10.75802800 | 0.75818300   | -4.68372500 | H | 0.17748300   | 3.56891700   | -0.77655200 |
| H  | -9.83015600  | 0.95436200   | -0.45759900 | O | -1.77149100  | 1.46122200   | -1.05143900 |
| H  | -11.13380000 | -0.64547200  | -2.49547400 | H | -6.18712400  | -2.20801400  | -6.04887900 |
| N  | -8.71576300  | 1.04543300   | -3.64964700 | H | -7.37288300  | -3.18422300  | -5.13847000 |
| C  | -7.96808400  | 1.24694700   | -4.88178800 | H | -11.47847500 | 1.03812600   | -2.08625800 |
| C  | -7.10342400  | 0.05501800   | -5.30819700 | H | -8.33554700  | -1.64971100  | 0.83511600  |
| O  | -6.23643300  | 0.22058900   | -6.20885500 | H | -4.28833300  | 3.21202900   | 3.95610400  |
| H  | -8.20474700  | 1.06058800   | -2.77559400 | H | -2.76813700  | -2.68582400  | 2.61569700  |
| H  | -7.31180100  | 2.11667500   | -4.79461100 | H | 1.27100600   | 3.67662400   | 5.16774800  |
| H  | -8.69134800  | 1.44167600   | -5.68023700 | H | 1.40226900   | 0.90631200   | 6.10273000  |
| N  | -7.35081600  | -1.13068600  | -4.70172400 | H | 0.76780500   | -4.19891300  | 1.60959300  |
| C  | -6.65661700  | -2.36002700  | -5.07593800 | H | 2.94578500   | 3.57923000   | 3.55305800  |
| H  | -8.00292800  | -1.17927400  | -3.92466700 | H | 5.18515800   | 10.86036100  | 0.75617300  |
| H  | -5.88052000  | -2.61963300  | -4.34687900 | H | -4.26561800  | 10.60201200  | -0.59533300 |
| C  | -3.61890700  | 0.02341400   | 2.21365800  | H | -4.36338800  | 7.01063000   | 2.06394200  |
| C  | -3.23935700  | -0.94218100  | 1.28347000  | H | -2.10272800  | 6.60158200   | -8.83246500 |
| C  | -2.80360300  | -2.27951000  | 1.61528600  | H | -0.67704400  | 5.69099600   | -8.31324300 |
| C  | -2.45442800  | -2.88924500  | 0.44084100  | H | -10.36846800 | 10.82443100  | -4.33974300 |
| C  | -2.68956200  | -1.93396400  | -0.61869900 | H | -9.08909000  | 11.32983800  | -3.21996400 |
| N  | -3.18155900  | -0.75056500  | -0.08668400 | H | 5.29652500   | -3.62268300  | -6.38144700 |
| C  | -2.48286900  | -2.18537000  | -1.97012100 | H | 0.60833900   | -12.00513000 | 1.96966600  |
| C  | -2.78302000  | -1.31120100  | -3.00720400 | H | 4.56565300   | -10.71817000 | 0.28725600  |
| C  | -2.75046400  | -1.65607200  | -4.41402500 | H | 7.26406300   | 4.11853200   | -6.27468300 |
| C  | -3.26909900  | -0.59199400  | -5.09852200 | H | -2.40364400  | -2.59966100  | -4.80866500 |
| C  | -3.58163000  | 0.42569600   | -4.11963500 | H | -3.47135500  | -0.49702400  | -6.15371200 |
| N  | -3.27111900  | -0.02356800  | -2.84718100 | H | -4.85859400  | 4.42299500   | -4.82060600 |
| C  | -4.08696500  | 1.68611600   | -4.42371800 | H | -4.89412100  | 5.80874000   | -2.47019500 |
| C  | -4.27711600  | 2.70666500   | -3.50049100 | H | -4.60359100  | 4.52460400   | 2.58706500  |
| C  | -4.65484200  | 4.06589600   | -3.82191000 | H | -2.08178800  | -3.89224400  | 0.29261500  |
| C  | -4.66617200  | 4.76842300   | -2.64870700 |   |              |              |             |
| C  | -4.32752800  | 3.83592400   | -1.59416100 |   |              |              |             |
| N  | -4.08541400  | 2.58144600   | -2.13210200 |   |              |              |             |
| C  | -4.34084300  | 4.15461200   | -0.24144800 |   |              |              |             |
| C  | -4.19886100  | 3.23956100   | 0.79409700  |   |              |              |             |
| C  | -4.37273300  | 3.54360300   | 2.19911200  |   |              |              |             |
| C  | -4.21669100  | 2.37477100   | 2.89025400  |   |              |              |             |
| C  | -3.92195600  | 1.34396400   | 1.91820100  |   |              |              |             |
| N  | -3.92844300  | 1.88783600   | 0.63850000  |   |              |              |             |
| Fe | -3.56028100  | 0.93976500   | -1.11142900 |   |              |              |             |
| H  | -3.63511200  | -0.27218100  | 3.25793000  |   |              |              |             |
| H  | -2.10179800  | -3.16465700  | -2.24100100 |   |              |              |             |
| H  | -4.33644100  | 1.87987400   | -5.45990700 |   |              |              |             |
| H  | -4.53155200  | 5.19490600   | 0.00553900  |   |              |              |             |
| O  | 0.79647100   | 4.32310300   | -2.08702100 |   |              |              |             |
| O  | 0.29730500   | 4.14997100   | -3.28487400 |   |              |              |             |
| C  | -0.41729100  | 5.02260300   | -3.87512600 |   |              |              |             |
| C  | 0.64624900   | 2.86659000   | -4.05971200 |   |              |              |             |
| C  | 0.61565100   | 1.57979300   | -3.29036900 |   |              |              |             |
| C  | 1.68461900   | 1.20908700   | -2.30900500 |   |              |              |             |
| C  | 1.60524800   | -0.24434000  | -1.80646000 |   |              |              |             |
| C  | 2.73271000   | -0.58459400  | -0.81403000 |   |              |              |             |
| C  | 2.75619500   | -2.05786000  | -0.36059700 |   |              |              |             |
| C  | 1.55027200   | -2.47704500  | 0.50162800  |   |              |              |             |
| C  | 1.62923500   | -3.93395800  | 0.98522300  |   |              |              |             |
| H  | 1.66948600   | 3.03607500   | -4.44450300 |   |              |              |             |
| H  | -0.02129500  | 2.82924800   | -4.92343700 |   |              |              |             |
| H  | -1.38340300  | 1.41886200   | -1.95172800 |   |              |              |             |
| H  | -0.07643900  | 0.80556900   | -3.62241200 |   |              |              |             |
| H  | 1.65653300   | 1.89623100   | -1.44809800 |   |              |              |             |
| H  | 2.67303700   | 1.38153900   | -2.77241900 |   |              |              |             |
| H  | 0.62253100   | -0.40316000  | -1.34125100 |   |              |              |             |
| H  | 1.67378400   | -0.93165500  | -2.66196900 |   |              |              |             |

## Cartesian Coordinates of model A

<sup>2</sup>Re<sub>A</sub>:

|   |              |              |              |
|---|--------------|--------------|--------------|
| 6 | 5.229138000  | 5.117466000  | 1.740911000  |
| 6 | 5.507686000  | 3.627326000  | 1.464534000  |
| 6 | 4.388030000  | 2.841559000  | 0.750360000  |
| 6 | 4.124237000  | 3.350051000  | -0.674936000 |
| 6 | 4.735646000  | 1.345545000  | 0.727562000  |
| 6 | 4.054474000  | 5.481191000  | 2.623694000  |
| 8 | 3.365880000  | 6.491952000  | 2.433373000  |
| 1 | 5.083913000  | 5.660391000  | 0.802540000  |
| 1 | 6.420715000  | 3.575109000  | 0.854767000  |
| 1 | 5.768775000  | 3.111641000  | 2.401574000  |
| 1 | 3.459325000  | 2.961575000  | 1.326460000  |
| 1 | 3.230555000  | 2.873399000  | -1.091550000 |
| 1 | 3.956648000  | 4.432214000  | -0.703221000 |
| 1 | 4.975749000  | 3.129664000  | -1.332871000 |
| 1 | 3.957943000  | 0.772542000  | 0.212273000  |
| 1 | 4.834272000  | 0.939419000  | 1.740947000  |
| 1 | 5.682961000  | 1.174034000  | 0.198427000  |
| 7 | 3.872184000  | 4.657000000  | 3.674242000  |
| 6 | 2.795071000  | 4.784519000  | 4.631052000  |
| 6 | 2.892186000  | 3.613448000  | 5.599879000  |
| 6 | 2.805848000  | 2.246450000  | 4.946248000  |
| 6 | 1.728497000  | 1.902152000  | 4.116893000  |
| 6 | 1.648196000  | 0.642062000  | 3.526465000  |
| 6 | 2.647816000  | -0.305268000 | 3.771226000  |
| 6 | 3.729296000  | 0.023664000  | 4.589705000  |
| 6 | 3.809792000  | 1.295204000  | 5.165074000  |
| 1 | 4.376420000  | 3.781159000  | 3.680754000  |
| 1 | 1.828426000  | 4.785608000  | 4.114378000  |
| 1 | 3.833838000  | 3.691969000  | 6.157997000  |
| 1 | 2.091472000  | 3.719752000  | 6.345443000  |
| 1 | 0.944021000  | 2.624986000  | 3.911034000  |
| 1 | 0.813498000  | 0.423344000  | 2.866734000  |
| 1 | 2.587289000  | -1.289041000 | 3.315598000  |
| 1 | 4.513424000  | -0.704945000 | 4.778900000  |
| 1 | 4.656144000  | 1.556474000  | 5.796931000  |
| 6 | 2.436703000  | 2.342950000  | -4.832323000 |
| 6 | 1.263254000  | 3.227471000  | -4.376765000 |
| 6 | -0.032495000 | 3.032028000  | -5.174029000 |
| 6 | 2.228730000  | 0.842874000  | -4.587815000 |
| 1 | 2.629072000  | 2.514624000  | -5.902386000 |
| 1 | 1.061771000  | 3.049564000  | -3.311813000 |
| 1 | 1.568374000  | 4.280144000  | -4.462059000 |
| 1 | 0.132055000  | 3.206557000  | -6.246893000 |
| 1 | -0.429885000 | 2.015501000  | -5.059615000 |
| 1 | -0.800232000 | 3.732678000  | -4.829586000 |
| 1 | 3.105191000  | 0.262904000  | -4.903908000 |
| 1 | 1.360664000  | 0.457411000  | -5.135424000 |
| 1 | 2.059636000  | 0.640453000  | -3.522796000 |
| 6 | -2.103634000 | 7.315190000  | -1.921812000 |
| 6 | -0.924068000 | 7.297893000  | -0.923929000 |
| 6 | 0.364318000  | 6.658755000  | -1.466283000 |
| 6 | 1.351234000  | 6.264688000  | -0.354431000 |
| 7 | 0.817246000  | 5.176844000  | 0.472128000  |
| 6 | 0.270471000  | 5.318248000  | 1.670997000  |
| 7 | 0.478496000  | 6.467534000  | 2.394883000  |
| 7 | -0.529439000 | 4.353445000  | 2.150664000  |
| 6 | -2.393357000 | 5.933190000  | -2.507965000 |
| 8 | -1.968543000 | 5.629752000  | -3.626486000 |
| 1 | -1.867201000 | 7.956677000  | -2.775842000 |
| 1 | -1.232712000 | 6.757886000  | -0.023095000 |
| 1 | -0.719895000 | 8.327463000  | -0.600683000 |
| 1 | 0.129331000  | 5.763992000  | -2.053019000 |
| 1 | 0.871678000  | 7.350157000  | -2.152346000 |
| 1 | 2.284878000  | 5.909051000  | -0.799756000 |
| 1 | 1.602990000  | 7.118798000  | 0.277229000  |
| 1 | 0.637312000  | 4.252492000  | -0.018292000 |
| 1 | 1.459219000  | 6.763233000  | 2.424329000  |
| 1 | 0.041074000  | 6.478837000  | 3.307326000  |
| 1 | -0.580000000 | 3.397293000  | 1.657762000  |
| 1 | -0.731373000 | 4.362967000  | 3.140867000  |
| 7 | -3.077023000 | 5.042224000  | -1.739803000 |
| 6 | -3.287919000 | 3.664019000  | -2.223967000 |

## optimized structures.

|    |              |              |              |
|----|--------------|--------------|--------------|
| 6  | -4.305743000 | 3.081025000  | -1.235066000 |
| 6  | -3.995237000 | 3.836109000  | 0.067714000  |
| 6  | -3.677838000 | 5.261474000  | -0.415092000 |
| 1  | -2.333183000 | 3.124293000  | -2.201618000 |
| 1  | -5.326766000 | 3.305972000  | -1.570240000 |
| 1  | -4.214408000 | 1.996679000  | -1.129289000 |
| 1  | -4.818050000 | 3.817950000  | 0.789897000  |
| 1  | -3.111964000 | 3.397607000  | 0.546030000  |
| 1  | -2.995024000 | 5.781281000  | 0.261702000  |
| 1  | -4.595034000 | 5.864871000  | -0.498845000 |
| 6  | 1.438156000  | -4.406531000 | -7.407088000 |
| 6  | 0.477205000  | -3.304024000 | -7.792674000 |
| 6  | -0.662365000 | -3.577708000 | -8.561539000 |
| 6  | -1.529250000 | -2.554810000 | -8.952232000 |
| 6  | -1.271596000 | -1.234767000 | -8.575010000 |
| 6  | -0.143833000 | -0.948481000 | -7.800889000 |
| 6  | 0.719119000  | -1.975217000 | -7.414476000 |
| 1  | 1.886430000  | -4.223841000 | -6.424160000 |
| 1  | 0.940404000  | -5.381810000 | -7.377899000 |
| 1  | -0.871746000 | -4.602983000 | -8.859379000 |
| 1  | -2.405443000 | -2.790256000 | -9.551225000 |
| 1  | -1.941572000 | -0.435827000 | -8.882218000 |
| 1  | 0.063282000  | 0.073775000  | -7.495521000 |
| 1  | 1.592475000  | -1.740663000 | -6.809902000 |
| 16 | -6.524155000 | -3.632434000 | -1.560259000 |
| 1  | -7.653919000 | -2.915387000 | -1.758147000 |
| 6  | -5.043215000 | -2.801468000 | 2.000626000  |
| 6  | -4.083205000 | -3.362400000 | 1.168287000  |
| 6  | -3.129691000 | -4.363427000 | 1.582295000  |
| 6  | -2.404207000 | -4.693474000 | 0.479955000  |
| 6  | -2.902644000 | -3.879139000 | -0.602709000 |
| 7  | -3.929577000 | -3.080992000 | -0.165100000 |
| 6  | -2.393107000 | -3.886339000 | -1.893479000 |
| 6  | -2.817382000 | -3.066237000 | -2.934341000 |
| 6  | -2.230175000 | -3.057195000 | -4.253262000 |
| 6  | -2.903154000 | -2.120339000 | -4.973847000 |
| 6  | -3.906958000 | -1.570121000 | -4.093716000 |
| 7  | -3.834822000 | -2.155309000 | -2.856887000 |
| 6  | -4.837666000 | -0.610929000 | -4.470841000 |
| 6  | -5.850508000 | -0.110095000 | -3.662213000 |
| 6  | -6.829890000 | 0.859404000  | -4.087922000 |
| 6  | -7.648907000 | 1.079780000  | -3.025658000 |
| 6  | -7.162082000 | 0.248698000  | -1.948443000 |
| 7  | -6.073385000 | -0.473672000 | -2.359101000 |
| 6  | -7.723446000 | 0.203227000  | -0.675254000 |
| 6  | -7.260607000 | -0.562796000 | 0.382613000  |
| 6  | -7.826908000 | -0.560174000 | 1.709170000  |
| 6  | -7.060121000 | -1.390980000 | 2.465929000  |
| 6  | -6.030198000 | -1.913542000 | 1.601891000  |
| 7  | -6.175901000 | -1.410263000 | 0.329769000  |
| 26 | -4.906510000 | -1.668765000 | -1.229742000 |
| 1  | -5.043234000 | -3.112082000 | 3.040960000  |
| 1  | -1.578009000 | -4.572221000 | -2.102975000 |
| 1  | -4.778065000 | -0.232442000 | -5.486669000 |
| 1  | -8.588047000 | 0.834097000  | -0.491741000 |
| 8  | -0.604374000 | 1.947908000  | 1.022280000  |
| 6  | -0.226346000 | 1.900990000  | -0.192145000 |
| 8  | 0.357596000  | 2.840996000  | -0.809927000 |
| 6  | -0.551074000 | 0.626400000  | -0.979504000 |
| 6  | -0.168585000 | -0.682748000 | -0.273958000 |
| 6  | 1.346654000  | -0.875764000 | -0.125666000 |
| 6  | 1.767993000  | -2.198787000 | 0.536895000  |
| 6  | 1.503560000  | -3.447968000 | -0.312924000 |
| 1  | -1.637016000 | 0.617954000  | -1.140064000 |
| 1  | -0.071013000 | 0.692118000  | -1.961814000 |
| 1  | -0.643783000 | -0.698112000 | 0.714930000  |
| 1  | -0.599732000 | -1.516002000 | -0.842604000 |
| 1  | 1.749265000  | -0.042058000 | 0.464711000  |
| 1  | 1.822411000  | -0.806343000 | -1.116367000 |
| 1  | 2.841037000  | -2.153139000 | 0.770801000  |
| 1  | 1.246943000  | -2.302677000 | 1.500307000  |
| 1  | 0.434360000  | -3.580648000 | -0.509725000 |
| 1  | 2.014833000  | -3.378390000 | -1.281672000 |

|                                        |              |              |              |    |              |              |              |
|----------------------------------------|--------------|--------------|--------------|----|--------------|--------------|--------------|
| 8                                      | -3.927570000 | -0.455900000 | -0.766481000 | 8  | -2.591856000 | 6.712080000  | -2.075873000 |
| 1                                      | 1.864328000  | -4.353868000 | 0.189564000  | 1  | -2.073122000 | 8.719008000  | -0.684592000 |
| 1                                      | 2.263206000  | -4.484279000 | -8.128015000 | 1  | -1.447017000 | 6.652668000  | 1.500720000  |
| 1                                      | 3.347448000  | 2.661017000  | -4.305142000 | 1  | -0.747863000 | 8.259636000  | 1.399142000  |
| 1                                      | -3.636899000 | 3.680916000  | -3.259883000 | 1  | -0.401445000 | 6.225130000  | -0.868762000 |
| 1                                      | -2.988990000 | 7.731702000  | -1.424234000 | 1  | 0.536205000  | 7.678577000  | -0.587504000 |
| 1                                      | 6.121100000  | 5.563108000  | 2.205609000  | 1  | 1.871190000  | 5.759333000  | 0.087989000  |
| 1                                      | 2.880171000  | 5.738710000  | 5.164828000  | 1  | 1.442218000  | 6.647299000  | 1.550688000  |
| 1                                      | -7.169166000 | -1.641990000 | 3.513259000  | 1  | 0.061381000  | 4.120135000  | 0.610313000  |
| 1                                      | -3.049545000 | -4.758789000 | 2.586763000  | 1  | 1.948414000  | 5.380179000  | 3.331157000  |
| 1                                      | -8.503823000 | 1.740203000  | -2.953107000 | 1  | 0.724981000  | 5.032930000  | 4.484176000  |
| 1                                      | -8.693905000 | 0.015678000  | 2.006952000  | 1  | -1.246496000 | 3.167319000  | 2.184218000  |
| 1                                      | -1.600340000 | -5.412672000 | 0.390677000  | 1  | -0.614687000 | 3.238539000  | 3.836108000  |
| 1                                      | -1.407642000 | -3.684454000 | -4.571016000 | 7  | -3.738760000 | 5.874012000  | -0.312201000 |
| 1                                      | -6.871984000 | 1.300516000  | -5.075466000 | 6  | -4.189354000 | 4.702023000  | -1.088501000 |
| 1                                      | -2.745537000 | -1.823652000 | -6.002655000 | 6  | -5.178522000 | 3.990372000  | -0.154388000 |
|                                        |              |              |              | 6  | -4.705373000 | 4.399567000  | 1.249848000  |
|                                        |              |              |              | 6  | -4.258600000 | 5.857010000  | 1.062767000  |
| <b><sup>2</sup>TS1<sub>HA,α</sub>:</b> |              |              |              | 1  | -3.325242000 | 4.070663000  | -1.324900000 |
| 6                                      | 6.056645000  | 5.128999000  | 2.183577000  | 1  | -6.198647000 | 4.352025000  | -0.335914000 |
| 6                                      | 6.242827000  | 5.790724000  | 0.798044000  | 1  | -5.165391000 | 2.908052000  | -0.301879000 |
| 6                                      | 5.309267000  | 6.973905000  | 0.472790000  | 1  | -5.479476000 | 4.299294000  | 2.017636000  |
| 6                                      | 5.407098000  | 8.104698000  | 1.507801000  | 1  | -3.848823000 | 3.779873000  | 1.532192000  |
| 6                                      | 5.607927000  | 7.494484000  | -0.941570000 | 1  | -3.495488000 | 6.155209000  | 1.787105000  |
| 6                                      | 4.651879000  | 4.587908000  | 2.411541000  | 1  | -5.107964000 | 6.550401000  | 1.165278000  |
| 8                                      | 3.774086000  | 5.279584000  | 2.949146000  | 6  | 0.633765000  | -6.327093000 | -2.051830000 |
| 1                                      | 6.251611000  | 5.851226000  | 2.980533000  | 6  | 1.183774000  | -5.239308000 | -2.946839000 |
| 1                                      | 7.285543000  | 6.133044000  | 0.735035000  | 6  | 1.007984000  | -5.288507000 | -4.336330000 |
| 6                                      | 6.126565000  | 5.024602000  | 0.018684000  | 6  | 1.545483000  | -4.299771000 | -5.166855000 |
| 1                                      | 4.274923000  | 6.601984000  | 0.483242000  | 6  | 2.266393000  | -3.238943000 | -4.612881000 |
| 1                                      | 4.791862000  | 8.959858000  | 1.204172000  | 6  | 2.442381000  | -3.172004000 | -3.227684000 |
| 1                                      | 5.057382000  | 7.779173000  | 2.492321000  | 6  | 1.905534000  | -4.163829000 | -2.406410000 |
| 1                                      | 6.441433000  | 8.461286000  | 1.606448000  | 1  | 0.214636000  | -5.913119000 | -1.127511000 |
| 1                                      | 4.917250000  | 8.298869000  | -1.219533000 | 1  | -0.151215000 | -6.901744000 | -2.554926000 |
| 1                                      | 5.515547000  | 6.699677000  | -1.691578000 | 1  | 0.447177000  | -6.111091000 | -4.774742000 |
| 1                                      | 6.627806000  | 7.896338000  | -1.004768000 | 1  | 1.399521000  | -4.360261000 | -6.240327000 |
| 7                                      | 4.430288000  | 3.320846000  | 1.986968000  | 1  | 2.687246000  | -2.470060000 | -5.255626000 |
| 6                                      | 3.124139000  | 2.670100000  | 2.045962000  | 1  | 2.992928000  | -2.345083000 | -2.786689000 |
| 6                                      | 3.234890000  | 1.164110000  | 1.766484000  | 1  | 2.047356000  | -4.104705000 | -1.329374000 |
| 6                                      | 3.769638000  | 0.850181000  | 0.382319000  | 16 | -5.959384000 | -1.687698000 | -3.957162000 |
| 6                                      | 3.001651000  | 1.134765000  | -0.759550000 | 1  | -6.505856000 | -0.638172000 | -4.610060000 |
| 6                                      | 3.504235000  | 0.859553000  | -2.031987000 | 6  | -5.970837000 | -2.634539000 | -0.019040000 |
| 6                                      | 4.778751000  | 0.303165000  | -2.186442000 | 6  | -4.841329000 | -3.031958000 | -0.721279000 |
| 6                                      | 5.548875000  | 0.018906000  | -1.058650000 | 6  | -4.176947000 | -4.297677000 | -0.535004000 |
| 6                                      | 5.044469000  | 0.291738000  | 0.216406000  | 6  | -3.131017000 | -4.328874000 | -1.408070000 |
| 1                                      | 5.153310000  | 2.854971000  | 1.452866000  | 6  | -3.143791000 | -3.074927000 | -2.118767000 |
| 1                                      | 2.438160000  | 3.128636000  | 1.325259000  | 7  | -4.197062000 | -2.307385000 | -1.693826000 |
| 1                                      | 3.870489000  | 0.697738000  | 2.529502000  | 6  | -2.193672000 | -2.689910000 | -3.056137000 |
| 1                                      | 2.230156000  | 0.739849000  | 1.884455000  | 6  | -2.178950000 | -1.463788000 | -3.703571000 |
| 1                                      | 2.008823000  | 1.571347000  | -0.656834000 | 6  | -1.181376000 | -1.069187000 | -4.666886000 |
| 1                                      | 2.896957000  | 1.079193000  | -2.905546000 | 6  | -1.526923000 | 0.172407000  | -5.106049000 |
| 1                                      | 5.166732000  | 0.094128000  | -3.179880000 | 6  | -2.742356000 | 0.537553000  | -4.420261000 |
| 1                                      | 6.537926000  | -0.418637000 | -1.166890000 | 7  | -3.106638000 | -0.460825000 | -3.548644000 |
| 1                                      | 5.641163000  | 0.049464000  | 1.094149000  | 6  | -3.460219000 | 1.696634000  | -4.672253000 |
| 6                                      | 1.868469000  | 3.979161000  | -4.301226000 | 6  | -4.692458000 | 2.004709000  | -4.111823000 |
| 6                                      | 0.683077000  | 4.555435000  | -3.507785000 | 6  | -5.462370000 | 3.182137000  | -4.428801000 |
| 6                                      | -0.507397000 | 5.001473000  | -4.365360000 | 6  | -6.602307000 | 3.117319000  | -3.685753000 |
| 6                                      | 1.538951000  | 2.717827000  | -5.109355000 | 6  | -6.523907000 | 1.908913000  | -2.901731000 |
| 1                                      | 2.259501000  | 4.749638000  | -4.982285000 | 7  | -5.361722000 | 1.238374000  | -3.193500000 |
| 1                                      | 0.345680000  | 3.819163000  | -2.764972000 | 6  | -7.467257000 | 1.530650000  | -1.955828000 |
| 1                                      | 1.044504000  | 5.420710000  | -2.933157000 | 6  | -7.373560000 | 0.413023000  | -1.139416000 |
| 1                                      | -0.195003000 | 5.724178000  | -5.131534000 | 6  | -8.345815000 | 0.047624000  | -0.133880000 |
| 1                                      | -0.970807000 | 4.151791000  | -4.881786000 | 6  | -7.911508000 | -1.112299000 | -0.427503000 |
| 1                                      | -1.276123000 | 5.475405000  | -3.746802000 | 6  | -6.679895000 | -1.463660000 | -0.242983000 |
| 1                                      | 2.436748000  | 2.305452000  | -5.586432000 | 7  | -6.368048000 | -0.513504000 | -1.175729000 |
| 1                                      | 0.814095000  | 2.926287000  | -5.904783000 | 26 | -4.703624000 | -0.475505000 | -2.352665000 |
| 1                                      | 1.106575000  | 1.937485000  | -4.469577000 | 1  | -6.352102000 | -3.314415000 | -0.736492000 |
| 6                                      | -2.358332000 | 7.908512000  | -0.007232000 | 1  | -1.399292000 | -3.391244000 | -3.290470000 |
| 6                                      | -1.126603000 | 7.425902000  | 0.792278000  | 1  | -3.045136000 | 2.398660000  | -5.388207000 |
| 6                                      | 0.008088000  | 6.861902000  | -0.077451000 | 1  | -8.333205000 | 2.172891000  | -1.830069000 |
| 6                                      | 1.033308000  | 6.051992000  | 0.731031000  | 8  | -1.984876000 | 2.245852000  | 1.036442000  |
| 7                                      | 0.425666000  | 4.837759000  | 1.281953000  | 6  | -1.257914000 | 2.021549000  | 0.029640000  |
| 6                                      | 0.237736000  | 4.574430000  | 2.573167000  | 8  | -0.258743000 | 2.714398000  | -0.337529000 |
| 7                                      | 0.948930000  | 5.245035000  | 3.521502000  | 6  | -1.486048000 | 0.763359000  | -0.799692000 |
| 7                                      | -0.687744000 | 3.673902000  | 2.927384000  | 6  | -0.895772000 | -0.504899000 | -0.190958000 |
| 6                                      | -2.926465000 | 6.797225000  | -0.889861000 |    |              |              |              |









|                                   |              |              |               |   |              |              |              |
|-----------------------------------|--------------|--------------|---------------|---|--------------|--------------|--------------|
| 1                                 | -1.845769000 | 2.839303000  | -6.047263000  | 6 | 5.129183000  | 7.135536000  | 2.176810000  |
| 1                                 | -0.556201000 | 1.055747000  | -7.202115000  | 8 | 3.909110000  | 6.950688000  | 2.065718000  |
| 1                                 | -1.624921000 | -0.320200000 | -8.965333000  | 1 | 5.215497000  | 8.749253000  | 0.807238000  |
| 16                                | -5.545847000 | -4.649239000 | -3.328075000  | 1 | 7.065819000  | 7.857412000  | -0.627088000 |
| 1                                 | -6.702363000 | -3.958148000 | -3.445311000  | 1 | 7.194888000  | 6.429283000  | 0.389403000  |
| 6                                 | -4.991681000 | -4.994541000 | 0.650026000   | 1 | 4.909506000  | 5.719557000  | -0.271983000 |
| 6                                 | -3.837513000 | -5.297944000 | -0.066496000  | 1 | 3.768790000  | 6.851912000  | -2.209563000 |
| 6                                 | -2.941288000 | -6.385373000 | 0.252854000   | 1 | 3.822908000  | 7.890384000  | -0.779503000 |
| 6                                 | -1.961846000 | -6.376797000 | -0.692146000  | 1 | 4.945145000  | 8.168816000  | -2.127697000 |
| 6                                 | -2.255700000 | -5.278692000 | -1.582207000  | 1 | 5.496147000  | 5.070146000  | -2.605332000 |
| 7                                 | -3.401547000 | -4.633315000 | -1.182598000  | 1 | 6.902305000  | 4.916294000  | -1.539822000 |
| 6                                 | -1.480781000 | -4.914268000 | -2.676344000  | 1 | 6.770554000  | 6.298045000  | -2.643171000 |
| 6                                 | -1.740245000 | -3.842396000 | -3.528825000  | 7 | 5.873854000  | 6.601891000  | 3.180446000  |
| 6                                 | -0.908924000 | -3.460569000 | -4.646509000  | 6 | 5.367875000  | 5.749430000  | 4.248191000  |
| 6                                 | -1.503396000 | -2.375837000 | -5.217704000  | 6 | 5.955340000  | 4.322721000  | 4.236270000  |
| 6                                 | -2.696138000 | -2.106240000 | -4.448235000  | 6 | 5.562254000  | 3.496699000  | 3.029563000  |
| 7                                 | -2.815344000 | -3.004854000 | -3.423675000  | 6 | 4.281822000  | 2.930497000  | 2.941232000  |
| 6                                 | -3.601741000 | -1.091125000 | -4.746237000  | 6 | 3.901479000  | 2.182198000  | 1.826191000  |
| 6                                 | -4.780777000 | -0.819753000 | -4.057919000  | 6 | 4.802108000  | 1.985622000  | 0.775263000  |
| 6                                 | -5.708101000 | 0.228959000  | -4.421279000  | 6 | 6.083478000  | 2.533517000  | 0.855678000  |
| 6                                 | -6.728753000 | 0.171513000  | -3.521337000  | 6 | 6.458332000  | 3.281259000  | 1.974989000  |
| 6                                 | -6.416472000 | -0.910282000 | -2.614111000  | 1 | 6.861616000  | 6.818249000  | 3.189967000  |
| 7                                 | -5.233941000 | -1.498873000 | -2.960306000  | 1 | 4.283062000  | 5.713812000  | 4.137358000  |
| 6                                 | -7.214047000 | -1.300327000 | -1.539317000  | 1 | 7.049020000  | 4.386228000  | 4.307899000  |
| 6                                 | -6.931069000 | -2.337972000 | -0.661563000  | 1 | 5.617273000  | 3.829132000  | 5.157044000  |
| 6                                 | -7.758824000 | -2.718115000 | 0.460175000   | 1 | 3.580790000  | 3.066033000  | 3.763049000  |
| 6                                 | -7.126712000 | -3.750912000 | 1.079588000   | 1 | 2.908387000  | 1.743246000  | 1.776581000  |
| 6                                 | -5.915682000 | -4.006747000 | 0.332788000   | 1 | 4.508600000  | 1.398112000  | -0.089824000 |
| 7                                 | -5.819041000 | -3.140759000 | -0.726353000  | 1 | 6.796368000  | 2.370035000  | 0.052057000  |
| 26                                | -4.294945000 | -3.037507000 | -2.043876000  | 1 | 7.466610000  | 3.685113000  | 2.038007000  |
| 1                                 | -5.205693000 | -5.607914000 | 1.520621000   | 6 | 2.783876000  | -1.258042000 | -1.520392000 |
| 1                                 | -0.593698000 | -5.507555000 | -2.878023000  | 6 | 2.043779000  | 0.057476000  | -1.820224000 |
| 1                                 | -3.371185000 | -0.460728000 | -5.599964000  | 6 | 1.251965000  | 0.057921000  | -3.133775000 |
| 1                                 | -8.132067000 | -0.743909000 | -1.373019000  | 6 | 1.860768000  | -2.444150000 | -1.215185000 |
| 8                                 | -0.370799000 | 2.503622000  | 1.833026000   | 1 | 3.429895000  | -1.508868000 | -2.374439000 |
| 6                                 | 0.280188000  | 1.977764000  | 0.883326000   | 1 | 1.366609000  | 0.290700000  | -0.985093000 |
| 8                                 | 0.956767000  | 2.571708000  | 0.005437000   | 1 | 2.777414000  | 0.877570000  | -1.853003000 |
| 6                                 | 0.265575000  | 0.407203000  | 0.818304000   | 1 | 1.921297000  | -0.113266000 | -3.987725000 |
| 6                                 | -1.086460000 | -0.163794000 | 1.006155000   | 1 | 0.489306000  | -0.728282000 | -3.154661000 |
| 6                                 | -1.742906000 | -0.312737000 | 2.332561000   | 1 | 0.745505000  | 1.017126000  | -3.284438000 |
| 6                                 | -2.618266000 | -1.580504000 | 2.456067000   | 1 | 2.439231000  | -3.347212000 | -0.986960000 |
| 6                                 | -1.797012000 | -2.871650000 | 2.535215000   | 1 | 1.198081000  | -2.678798000 | -2.054735000 |
| 1                                 | 0.703480000  | 0.115611000  | -0.140041000  | 1 | 1.225007000  | -2.232607000 | -0.344888000 |
| 1                                 | 0.940383000  | 0.080047000  | 1.624503000   | 6 | -1.235525000 | 5.359778000  | -2.277646000 |
| 1                                 | -2.514623000 | -2.247894000 | -0.843664000  | 6 | -0.478592000 | 5.538502000  | -0.943770000 |
| 1                                 | -1.702079000 | -0.343886000 | 0.126122000   | 6 | 0.916750000  | 4.896244000  | -0.936689000 |
| 1                                 | -2.382359000 | 0.573442000  | 2.497329000   | 6 | 1.656564000  | 5.055624000  | 0.393626000  |
| 1                                 | -0.992113000 | -0.281097000 | 3.134923000   | 7 | 0.940005000  | 4.360401000  | 1.476801000  |
| 1                                 | -3.245548000 | -1.490539000 | 3.353116000   | 6 | 0.821657000  | 4.789519000  | 2.729196000  |
| 1                                 | -3.292300000 | -1.628848000 | 1.592072000   | 7 | 1.565119000  | 5.808668000  | 3.193192000  |
| 1                                 | -1.163369000 | -2.992157000 | 1.647948000   | 7 | -0.082052000 | 4.223386000  | 3.558112000  |
| 1                                 | -1.138902000 | -2.874647000 | 3.414249000   | 6 | -1.369005000 | 3.884250000  | -2.654848000 |
| 8                                 | -3.391895000 | -1.852343000 | -0.982272000  | 8 | -0.459837000 | 3.335375000  | -3.292055000 |
| 1                                 | -2.447510000 | -3.751182000 | 2.597226000   | 1 | -0.668801000 | 5.830819000  | -3.086882000 |
| 1                                 | -3.985174000 | 0.294414000  | -10.924402000 | 1 | -1.080684000 | 5.115231000  | -0.128475000 |
| 1                                 | 4.008814000  | 0.069941000  | -2.647333000  | 1 | -0.386882000 | 6.613185000  | -0.732352000 |
| 1                                 | -2.640626000 | 1.870772000  | -3.466125000  | 1 | 0.848062000  | 3.835446000  | -1.201163000 |
| 1                                 | -2.576581000 | 6.303485000  | -2.763280000  | 1 | 1.539784000  | 5.352980000  | -1.715686000 |
| 1                                 | 6.932463000  | 6.085169000  | 1.080387000   | 1 | 2.671193000  | 4.648641000  | 0.321701000  |
| 1                                 | 4.495104000  | 7.607807000  | 4.446583000   | 1 | 1.743327000  | 6.110700000  | 0.666339000  |
| 1                                 | -7.437241000 | -4.301938000 | 1.958324000   | 1 | 0.512323000  | 3.460241000  | 1.240799000  |
| 1                                 | -3.066339000 | -7.062643000 | 1.088265000   | 1 | 2.406039000  | 6.160403000  | 2.719203000  |
| 1                                 | -7.615574000 | 0.790313000  | -3.464030000  | 1 | 1.262462000  | 6.293500000  | 4.024873000  |
| 1                                 | -8.695122000 | -2.243464000 | 0.725377000   | 1 | -0.691043000 | 3.462628000  | 3.244443000  |
| 1                                 | -1.114078000 | -7.042733000 | -0.792104000  | 1 | 0.070847000  | 4.285161000  | 4.554230000  |
| 1                                 | 0.000907000  | -3.966794000 | -4.943094000  | 7 | -2.457432000 | 3.208093000  | -2.220216000 |
| 1                                 | -5.572898000 | 0.901154000  | -5.258962000  | 6 | -2.610753000 | 1.761725000  | -2.496535000 |
| 1                                 | -1.187105000 | -1.802686000 | -6.079256000  | 6 | -4.035061000 | 1.444683000  | -2.027609000 |
|                                   |              |              |               | 6 | -4.279010000 | 2.474485000  | -0.912377000 |
|                                   |              |              |               | 6 | -3.586783000 | 3.741597000  | -1.439086000 |
|                                   |              |              |               | 1 | -1.852808000 | 1.205149000  | -1.930627000 |
|                                   |              |              |               | 1 | -4.742342000 | 1.608611000  | -2.847563000 |
|                                   |              |              |               | 1 | -4.136430000 | 0.401942000  | -1.710350000 |
|                                   |              |              |               | 1 | -5.338800000 | 2.641884000  | -0.697370000 |
|                                   |              |              |               | 1 | -3.795038000 | 2.156333000  | 0.020548000  |
| <sup>2</sup> TS <sub>DC,A</sub> : |              |              |               |   |              |              |              |
| 6                                 | 5.902668000  | 7.982238000  | 1.173280000   |   |              |              |              |
| 6                                 | 6.480678000  | 7.164526000  | -0.006441000  |   |              |              |              |
| 6                                 | 5.459335000  | 6.434052000  | -0.900258000  |   |              |              |              |
| 6                                 | 4.441454000  | 7.393939000  | -1.534469000  |   |              |              |              |
| 6                                 | 6.199956000  | 5.632922000  | -1.981962000  |   |              |              |              |













|   |              |              |              |                                |              |               |               |
|---|--------------|--------------|--------------|--------------------------------|--------------|---------------|---------------|
| 1 | 3.644694000  | 1.344855000  | 3.038882000  | 1                              | -5.235784000 | -0.806451000  | -9.800911000  |
| 1 | 4.568744000  | 0.632775000  | 1.700313000  | 1                              | -5.136297000 | 1.439898000   | -8.820596000  |
| 7 | 4.542005000  | 5.837067000  | 3.646243000  | 1                              | -3.963326000 | 3.075853000   | -7.378809000  |
| 6 | 3.597327000  | 6.615754000  | 4.433828000  | 1                              | -1.584142000 | 2.704147000   | -6.734117000  |
| 6 | 3.124024000  | 5.888367000  | 5.698966000  | 1                              | -0.396530000 | 0.688169000   | -7.571767000  |
| 6 | 2.397914000  | 4.564531000  | 5.512427000  | 1                              | -1.571755000 | -0.946643000  | -9.018087000  |
| 6 | 1.687383000  | 4.241665000  | 4.347865000  | 16                             | -5.137167000 | -4.431539000  | -2.859695000  |
| 6 | 0.991041000  | 3.033323000  | 4.237100000  | 1                              | -6.389752000 | -3.9271805000 | -2.889903000  |
| 6 | 0.994622000  | 2.128064000  | 5.300114000  | 6                              | -4.686593000 | -3.929299000  | 1.178098000   |
| 6 | 1.701258000  | 2.433393000  | 6.464878000  | 6                              | -3.515591000 | -4.319229000  | 0.539341000   |
| 6 | 2.397776000  | 3.638099000  | 6.564975000  | 6                              | -2.574520000 | -5.270323000  | 1.082242000   |
| 1 | 5.255009000  | 5.320534000  | 4.143418000  | 6                              | -1.571561000 | -5.397159000  | 0.169348000   |
| 1 | 2.762860000  | 6.856835000  | 3.773035000  | 6                              | -1.897346000 | -4.521566000  | -0.929952000  |
| 1 | 3.986293000  | 5.730063000  | 6.362218000  | 7                              | -3.080115000 | -3.867833000  | -0.683243000  |
| 1 | 2.473778000  | 6.590106000  | 6.242475000  | 6                              | -1.120746000 | -4.367046000  | -2.071456000  |
| 1 | 1.690287000  | 4.925590000  | 3.504185000  | 6                              | -1.445769000 | -3.548496000  | -3.145186000  |
| 1 | 0.455701000  | 2.792167000  | 3.321386000  | 6                              | -0.640970000 | -3.400529000  | -4.334899000  |
| 1 | 0.455424000  | 1.188552000  | 5.216837000  | 6                              | -1.306855000 | -2.539771000  | -5.152673000  |
| 1 | 1.715862000  | 1.731828000  | 7.294903000  | 6                              | -2.521062000 | -2.166160000  | -4.465107000  |
| 1 | 2.948310000  | 3.865650000  | 7.475853000  | 7                              | -2.580019000 | -2.780686000  | -3.293482000  |
| 6 | 3.378485000  | 0.035153000  | -3.557211000 | 6                              | -3.479719000 | -1.311893000  | -4.994040000  |
| 6 | 2.361486000  | 1.177718000  | -3.723518000 | 6                              | -4.664930000 | -0.948439000  | -4.367809000  |
| 6 | 1.304199000  | 0.935572000  | -4.808264000 | 6                              | -5.640972000 | -0.054244000  | -4.947507000  |
| 6 | 2.784012000  | -1.266540000 | -3.005140000 | 6                              | -6.646553000 | 0.070470000   | -4.038434000  |
| 1 | 3.856675000  | -0.166538000 | -4.527540000 | 6                              | -6.282923000 | -0.743930000  | -2.902209000  |
| 1 | 1.858389000  | 1.370742000  | -2.766231000 | 7                              | -5.075640000 | -1.358084000  | -3.124796000  |
| 1 | 2.910639000  | 2.097846000  | -3.969434000 | 6                              | -7.047774000 | -0.874448000  | -1.749694000  |
| 1 | 1.777745000  | 0.763747000  | -5.785330000 | 6                              | -6.701182000 | -1.650967000  | 0.651236000   |
| 1 | 0.681233000  | 0.061235000  | -4.584270000 | 6                              | -7.512445000 | -1.813524000  | -0.582790000  |
| 1 | 0.641241000  | 1.802404000  | -4.898532000 | 6                              | -6.847666000 | -2.675107000  | 1.349034000   |
| 1 | 3.550868000  | -2.045363000 | -2.909809000 | 6                              | -5.628294000 | -3.041798000  | 0.672289000   |
| 1 | 1.990125000  | -1.659372000 | -3.650232000 | 7                              | -5.547064000 | -2.394246000  | -0.540195000  |
| 1 | 2.349889000  | -1.106070000 | -2.009804000 | 26                             | -4.110623000 | -2.666151000  | -1.939121000  |
| 6 | -1.134421000 | 6.161613000  | -3.916692000 | 1                              | -4.892272000 | -4.369567000  | 2.149260000   |
| 6 | -0.264293000 | 6.468817000  | -2.677185000 | 1                              | -0.199977000 | -4.938682000  | -2.135285000  |
| 6 | 1.064621000  | 5.699181000  | -2.617517000 | 1                              | -3.287095000 | -0.895453000  | -5.977745000  |
| 6 | 1.714628000  | 5.765343000  | -1.227481000 | 1                              | -7.989884000 | -0.336340000  | -1.707315000  |
| 7 | 0.899817000  | 5.042839000  | -0.246032000 | 8                              | -0.978907000 | 2.285015000   | 1.048564000   |
| 6 | 0.392094000  | 5.553485000  | 0.864752000  | 6                              | -0.248424000 | 1.768915000   | 0.146415000   |
| 7 | 0.829300000  | 6.766708000  | 1.329140000  | 8                              | 0.407875000  | 2.403466000   | -0.733622000  |
| 7 | -0.603843000 | 4.913646000  | 1.501907000  | 6                              | -0.100176000 | 0.269435000   | 0.122247000   |
| 6 | -1.384404000 | 4.663642000  | -4.086417000 | 6                              | -0.519005000 | -0.521393000  | 1.122781000   |
| 8 | -0.691428000 | 4.007244000  | -4.873790000 | 6                              | -0.285910000 | -2.003759000  | 1.220534000   |
| 1 | -0.621169000 | 6.485462000  | -4.826831000 | 6                              | 0.672717000  | -2.407586000  | 2.364335000   |
| 1 | -0.839243000 | 6.241515000  | -1.771997000 | 6                              | 0.154000000  | -2.081323000  | 3.769027000   |
| 1 | -0.065511000 | 7.548971000  | -2.647589000 | 1                              | -2.268780000 | -0.935003000  | -0.703870000  |
| 1 | 0.911492000  | 4.648349000  | -2.887405000 | 1                              | 0.445369000  | -0.136576000  | -0.728526000  |
| 1 | 1.772468000  | 6.103559000  | -3.352659000 | 1                              | -3.745294000 | -0.769576000  | -0.243222000  |
| 1 | 2.714960000  | 5.321749000  | -1.249524000 | 1                              | -1.041335000 | -0.033753000  | 1.945977000   |
| 1 | 1.823828000  | 6.802518000  | -0.900673000 | 1                              | 0.116572000  | -2.378227000  | 0.271666000   |
| 1 | 0.643272000  | 4.044623000  | -0.473002000 | 1                              | -1.242791000 | -2.520758000  | 1.381274000   |
| 1 | 1.845786000  | 6.876932000  | 1.350829000  | 1                              | 0.848539000  | -3.488630000  | 2.288395000   |
| 1 | 0.362857000  | 7.103215000  | 2.161131000  | 1                              | 1.643414000  | -1.919531000  | 2.205600000   |
| 1 | -0.832733000 | 3.915521000  | 1.225887000  | 1                              | 0.034257000  | -1.001536000  | 3.915662000   |
| 1 | -0.720022000 | 5.115565000  | 2.486343000  | 1                              | -0.820419000 | -2.552360000  | 3.950283000   |
| 7 | -2.326204000 | 4.077650000  | -3.304637000 | 8                              | -3.188307000 | -0.898529000  | -1.029712000  |
| 6 | -2.480402000 | 2.608331000  | -3.303473000 | 1                              | 0.847160000  | -2.443367000  | 4.537169000   |
| 6 | -3.730710000 | 2.369824000  | -2.447462000 | 1                              | -3.927374000 | -0.664483000  | -10.979602000 |
| 6 | -3.730628000 | 3.564805000  | -1.480421000 | 1                              | 4.182552000  | 0.368321000   | -2.885622000  |
| 6 | -3.255110000 | 4.726794000  | -2.366542000 | 1                              | -2.573267000 | 2.231079000   | -4.324501000  |
| 1 | -1.585154000 | 2.159561000  | -2.856368000 | 1                              | -2.075601000 | 6.721087000   | -3.845400000  |
| 1 | -4.629277000 | 2.387011000  | -3.075968000 | 1                              | 6.542116000  | 5.082538000   | 2.081666000   |
| 1 | -3.694022000 | 1.402016000  | -1.942673000 | 1                              | 4.051096000  | 7.572062000   | 4.729131000   |
| 1 | -4.708874000 | 3.763804000  | -1.030656000 | 1                              | -7.145513000 | -3.042582000  | 2.323128000   |
| 1 | -3.010479000 | 3.392316000  | -0.671761000 | 1                              | -2.686006000 | -5.771677000  | 2.035566000   |
| 1 | -2.766935000 | 5.516784000  | -1.790500000 | 1                              | -7.554081000 | 0.656928000   | -4.110380000  |
| 1 | -4.099159000 | 5.178609000  | -2.909895000 | 1                              | -8.466859000 | -1.328817000  | 0.692178000   |
| 6 | -4.148672000 | -0.860805000 | -9.921623000 | 1                              | -0.689669000 | -6.023480000  | 0.218398000   |
| 6 | -3.441370000 | 0.125604000  | -9.020276000 | 1                              | 0.304414000  | -3.899915000  | -4.505362000  |
| 6 | -4.096826000 | 1.270069000  | -8.545806000 | 1                              | -5.540154000 | 0.409447000   | -5.920489000  |
| 6 | -3.433744000 | 2.195111000  | -7.734108000 | 1                              | -1.024271000 | -2.178614000  | -6.132948000  |
| 6 | -2.098401000 | 1.994276000  | -7.376486000 | <sup>4</sup> Re <sub>A</sub> : |              |               |               |
| 6 | -1.435040000 | 0.856154000  | -7.845071000 | 6                              | 5.229138000  | 5.117466000   | 1.740911000   |
| 6 | -2.099598000 | -0.065837000 | -8.656763000 | 6                              | 5.506253000  | 3.627353000   | 1.463118000   |
| 1 | -3.837894000 | -1.890587000 | -9.712892000 | 6                              | 4.386324000  | 2.843677000   | 0.746816000   |

|   |              |              |              |    |              |              |               |
|---|--------------|--------------|--------------|----|--------------|--------------|---------------|
| 6 | 4.126930000  | 3.351951000  | -0.679411000 | 1  | -4.818597000 | 3.817548000  | 0.788863000   |
| 6 | 4.730290000  | 1.346847000  | 0.725534000  | 1  | -3.112509000 | 3.397030000  | 0.545263000   |
| 6 | 4.054625000  | 5.481859000  | 2.623798000  | 1  | -2.995175000 | 5.780943000  | 0.262101000   |
| 8 | 3.369612000  | 6.495601000  | 2.436272000  | 1  | -4.594940000 | 5.865033000  | -0.498798000  |
| 1 | 5.084759000  | 5.661398000  | 0.803012000  | 6  | 1.438156000  | -4.406531000 | -7.407088000  |
| 1 | 6.419774000  | 3.574682000  | 0.854138000  | 6  | 0.473633000  | -3.303767000 | -7.782758000  |
| 1 | 5.766024000  | 3.110466000  | 2.399861000  | 6  | -0.672479000 | -3.576929000 | -8.542073000  |
| 1 | 3.456526000  | 2.966053000  | 1.320656000  | 6  | -1.542877000 | -2.553839000 | -8.924160000  |
| 1 | 3.232638000  | 2.877698000  | -1.097441000 | 6  | -1.282174000 | -1.234154000 | -8.547717000  |
| 1 | 3.962744000  | 4.434600000  | -0.708898000 | 6  | -0.147955000 | -0.948430000 | -7.782890000  |
| 1 | 4.979115000  | 3.128500000  | -1.335431000 | 6  | 0.718430000  | -1.975462000 | -7.404962000  |
| 1 | 3.952533000  | 0.775585000  | 0.208362000  | 1  | 1.900440000  | -4.221424000 | -6.431142000  |
| 1 | 4.825177000  | 0.940779000  | 1.739305000  | 1  | 0.939241000  | -5.380882000 | -7.367655000  |
| 1 | 5.678585000  | 1.172765000  | 0.199000000  | 1  | -0.884049000 | -4.601950000 | -8.839233000  |
| 7 | 3.868831000  | 4.654601000  | 3.671380000  | 1  | -2.424125000 | -2.788694000 | -9.515913000  |
| 6 | 2.793467000  | 4.783561000  | 4.630024000  | 1  | -1.954354000 | -0.434808000 | -8.848910000  |
| 6 | 2.892186000  | 3.613448000  | 5.599879000  | 1  | 0.061591000  | 0.073653000  | -7.478507000  |
| 6 | 2.805327000  | 2.246104000  | 4.947068000  | 1  | 1.596996000  | -1.741795000 | -6.807647000  |
| 6 | 1.727855000  | 1.901652000  | 4.117884000  | 16 | -6.524155000 | -3.632434000 | -1.560259000  |
| 6 | 1.647613000  | 0.641426000  | 3.527789000  | 1  | -7.661239000 | -2.921096000 | -1.7351142000 |
| 6 | 2.647092000  | -0.305979000 | 3.772793000  | 6  | -5.064135000 | -2.835643000 | 2.027524000   |
| 6 | 3.728698000  | 0.023147000  | 4.590983000  | 6  | -4.101386000 | -3.386954000 | 1.191998000   |
| 6 | 3.809366000  | 1.294916000  | 5.165787000  | 6  | -3.148129000 | -4.391918000 | 1.596574000   |
| 1 | 4.370190000  | 3.777064000  | 3.675275000  | 6  | -2.421985000 | -4.710455000 | 0.491297000   |
| 1 | 1.825719000  | 4.784096000  | 4.115427000  | 6  | -2.919301000 | -3.885135000 | -0.583499000  |
| 1 | 3.834674000  | 3.692580000  | 6.156567000  | 7  | -3.946432000 | -3.090711000 | -0.137930000  |
| 1 | 2.092454000  | 3.720079000  | 6.346427000  | 6  | -2.407680000 | -3.880459000 | -1.873392000  |
| 1 | 0.943554000  | 2.624521000  | 3.911532000  | 6  | -2.830846000 | -3.051855000 | -2.908263000  |
| 1 | 0.813297000  | 0.422687000  | 2.867636000  | 6  | -2.240392000 | -3.028275000 | -4.225988000  |
| 1 | 2.586479000  | -1.289810000 | 3.317351000  | 6  | -2.916170000 | -2.087920000 | -4.939226000  |
| 1 | 4.512942000  | -0.705342000 | 4.780149000  | 6  | -3.924219000 | -1.550220000 | -4.055589000  |
| 1 | 4.656144000  | 1.556474000  | 5.796931000  | 7  | -3.851767000 | -2.146659000 | -2.824654000  |
| 6 | 2.436878000  | 2.343686000  | -4.831861000 | 6  | -4.858496000 | -0.591372000 | -4.424954000  |
| 6 | 1.262120000  | 3.226656000  | -4.376655000 | 6  | -5.871209000 | -0.097174000 | -3.612050000  |
| 6 | -0.034962000 | 3.025203000  | -5.170124000 | 6  | -6.850649000 | 0.875488000  | -4.031102000  |
| 6 | 2.233914000  | 0.843714000  | -4.582384000 | 6  | -7.670049000 | 1.088369000  | -2.964675000  |
| 1 | 2.626888000  | 2.512651000  | -5.902777000 | 6  | -7.183637000 | 0.248998000  | -1.896691000  |
| 1 | 1.063568000  | 3.051999000  | -3.310617000 | 7  | -6.094697000 | -0.469888000 | -2.311442000  |
| 1 | 1.564308000  | 4.279818000  | -4.466338000 | 6  | -7.746528000 | 0.189523000  | -0.624754000  |
| 1 | 0.126357000  | 3.197011000  | -6.243908000 | 6  | -7.283926000 | -0.587556000 | 0.425046000   |
| 1 | -0.429238000 | 2.007910000  | -5.051639000 | 6  | -7.857872000 | -0.605842000 | 1.748027000   |
| 1 | -0.803748000 | 3.724758000  | -4.825896000 | 6  | -7.091047000 | -1.442307000 | 2.498414000   |
| 1 | 3.112110000  | 0.265788000  | -4.897521000 | 6  | -6.053103000 | -1.947582000 | 1.634010000   |
| 1 | 1.366825000  | 0.453053000  | -5.127804000 | 7  | -6.192715000 | -1.426987000 | 0.368049000   |
| 1 | 2.066760000  | 0.644053000  | -3.516560000 | 26 | -4.928777000 | -1.675154000 | -1.188695000  |
| 6 | -2.102694000 | 7.315800000  | -1.921337000 | 1  | -5.067838000 | -3.157929000 | 3.064297000   |
| 6 | -0.923112000 | 7.298954000  | -0.923412000 | 1  | -1.591599000 | -4.563912000 | -2.086999000  |
| 6 | 0.365686000  | 6.660936000  | -1.465984000 | 1  | -4.800334000 | -0.204904000 | -5.437881000  |
| 6 | 1.353461000  | 6.268703000  | -0.354255000 | 1  | -8.614063000 | 0.814805000  | -0.436067000  |
| 7 | 0.820884000  | 5.180670000  | 0.472874000  | 8  | -0.606464000 | 1.953102000  | 1.021493000   |
| 6 | 0.273657000  | 5.322401000  | 1.671592000  | 6  | -0.226090000 | 1.905605000  | -0.192163000  |
| 7 | 0.481733000  | 6.471682000  | 2.395332000  | 8  | 0.360644000  | 2.844545000  | -0.808888000  |
| 7 | -0.526212000 | 4.357738000  | 2.151323000  | 6  | -0.551707000 | 0.631592000  | -0.980057000  |
| 6 | -2.391900000 | 5.933665000  | -2.507307000 | 6  | -0.175899000 | -0.678490000 | -0.272913000  |
| 8 | -1.965934000 | 5.629671000  | -3.625199000 | 6  | 1.338338000  | -0.877477000 | -0.121994000  |
| 1 | -1.866479000 | 7.957406000  | -2.775340000 | 6  | 1.753026000  | -2.200075000 | 0.545720000   |
| 1 | -1.231471000 | 6.758291000  | -0.022881000 | 6  | 1.482009000  | -3.451419000 | -0.298821000  |
| 1 | -0.719638000 | 8.328499000  | -0.599658000 | 1  | -1.637150000 | 0.626389000  | -1.144168000  |
| 1 | 0.131181000  | 5.765510000  | -2.051887000 | 1  | -0.068153000 | 0.695745000  | -1.960733000  |
| 1 | 0.871930000  | 7.352439000  | -2.152768000 | 1  | -0.653094000 | -0.691196000 | 0.715070000   |
| 1 | 2.287420000  | 5.913975000  | -0.799650000 | 1  | -0.609306000 | -1.510399000 | -0.841755000  |
| 1 | 1.604285000  | 7.123453000  | 0.276935000  | 1  | 1.743838000  | -0.043524000 | 0.466074000   |
| 1 | 0.641147000  | 4.256201000  | -0.017281000 | 1  | 1.815665000  | -0.813348000 | -1.112306000  |
| 1 | 1.462409000  | 6.767497000  | 2.424661000  | 1  | 2.826370000  | -2.158945000 | 0.779030000   |
| 1 | 0.044336000  | 6.483228000  | 3.307776000  | 1  | 1.231796000  | -2.297347000 | 1.509735000   |
| 1 | -0.578142000 | 3.401779000  | 1.658113000  | 1  | 0.411949000  | -3.580537000 | -0.493216000  |
| 1 | -0.728933000 | 4.367686000  | 3.141339000  | 1  | 1.992003000  | -3.387875000 | -1.368671000  |
| 7 | -3.076727000 | 5.042932000  | -1.739770000 | 8  | -3.934102000 | -0.461904000 | -0.752903000  |
| 6 | -3.287617000 | 3.664998000  | -2.224566000 | 1  | 1.839923000  | -4.356702000 | 0.206812000   |
| 6 | -4.305819000 | 3.081656000  | -1.236296000 | 1  | 2.252799000  | -4.488079000 | -8.139338000  |
| 6 | -3.995570000 | 3.835950000  | 0.066939000  | 1  | 3.347701000  | 2.665775000  | -4.307292000  |
| 6 | -3.677838000 | 5.261474000  | -0.415092000 | 1  | -3.636132000 | 3.682300000  | -3.260637000  |
| 1 | -2.332985000 | 3.125076000  | -2.202106000 | 1  | -2.988233000 | 7.731943000  | -1.423793000  |
| 1 | -5.326721000 | 3.306899000  | -1.571518000 | 1  | 6.121213000  | 5.562127000  | 2.206303000   |
| 1 | -4.214548000 | 1.997336000  | -1.131062000 | 1  | 2.880074000  | 5.738443000  | 5.162253000   |

|                               |              |              |              |    |              |              |              |
|-------------------------------|--------------|--------------|--------------|----|--------------|--------------|--------------|
| 1                             | -7.204915000 | -1.707794000 | 3.541636000  | 1  | 0.342886000  | 2.686929000  | 0.903395000  |
| 1                             | -3.068694000 | -4.797702000 | 2.596926000  | 1  | 2.812622000  | 4.445664000  | 2.883748000  |
| 1                             | -8.525242000 | 1.747963000  | -2.890752000 | 1  | 1.881889000  | 4.245011000  | 4.322346000  |
| 1                             | -8.729879000 | -0.038807000 | 2.048045000  | 1  | -0.573029000 | 2.113772000  | 2.862278000  |
| 1                             | -1.617653000 | -5.428151000 | 0.394757000  | 1  | 0.400863000  | 2.446603000  | 4.309730000  |
| 1                             | -1.414361000 | -3.648774000 | -4.547927000 | 7  | -3.464106000 | 4.914014000  | 0.389013000  |
| 1                             | -6.892516000 | 1.323564000  | -5.015513000 | 6  | -4.280635000 | 3.800120000  | -0.138301000 |
| 1                             | -2.757453000 | -1.781179000 | -5.964956000 | 6  | -5.075863000 | 3.310091000  | 1.079645000  |
|                               |              |              |              | 6  | -4.175326000 | 3.685547000  | 2.268173000  |
|                               |              |              |              | 6  | -3.599914000 | 5.046049000  | 1.847496000  |
| <b>*TS1<sub>HA,A,g</sub>:</b> |              |              |              | 1  | -3.628875000 | 3.014849000  | -0.533346000 |
| 6                             | 6.637235000  | 5.048189000  | 1.073641000  | 1  | -6.037606000 | 3.835122000  | 1.149167000  |
| 6                             | 6.532634000  | 5.002306000  | -0.469295000 | 1  | -5.274881000 | 2.237280000  | 1.016978000  |
| 6                             | 5.220760000  | 5.534838000  | -1.079292000 | 1  | -4.709805000 | 3.740350000  | 3.222347000  |
| 6                             | 4.957408000  | 7.004660000  | -0.719335000 | 1  | -3.365322000 | 2.953544000  | 2.363196000  |
| 6                             | 5.240895000  | 5.335513000  | -2.602573000 | 1  | -2.641182000 | 5.258894000  | 2.326099000  |
| 6                             | 5.568835000  | 4.214261000  | 1.767668000  | 1  | -4.292175000 | 5.864808000  | 2.099505000  |
| 8                             | 4.493609000  | 4.710947000  | 2.124708000  | 6  | 0.602127000  | -6.469530000 | -0.324947000 |
| 1                             | 6.530106000  | 6.073317000  | 1.436591000  | 6  | 1.288607000  | -5.327106000 | -1.039388000 |
| 1                             | 7.375129000  | 5.579676000  | -0.875904000 | 6  | 1.829627000  | -5.492555000 | -2.320910000 |
| 1                             | 6.678777000  | 3.965618000  | -0.801609000 | 6  | 2.474863000  | -4.436976000 | -2.972270000 |
| 1                             | 4.392652000  | 4.937479000  | -3.053990000 | 6  | 2.589183000  | -3.194040000 | -2.348067000 |
| 1                             | 4.052587000  | 7.367998000  | -1.220395000 | 6  | 2.048772000  | -3.012865000 | -1.070748000 |
| 1                             | 4.812255000  | 7.138454000  | 0.357560000  | 6  | 1.405673000  | -4.069414000 | -0.426905000 |
| 1                             | 5.790622000  | 7.645937000  | -1.037488000 | 1  | -0.391910000 | -6.176648000 | 0.033978000  |
| 1                             | 4.304165000  | 5.680239000  | -3.056006000 | 1  | 0.480641000  | -7.337332000 | -0.981348000 |
| 1                             | 5.369115000  | 4.278494000  | -2.864282000 | 1  | 1.747495000  | -6.458943000 | -2.813803000 |
| 1                             | 6.061039000  | 5.901128000  | -3.064626000 | 1  | 2.887909000  | -4.589853000 | -3.966224000 |
| 7                             | 5.876489000  | 2.901864000  | 1.937439000  | 1  | 3.094704000  | -2.369886000 | -2.844442000 |
| 6                             | 4.980418000  | 1.895905000  | 2.493675000  | 1  | 2.126833000  | -2.045141000 | -0.583293000 |
| 6                             | 4.978065000  | 0.590494000  | 1.673880000  | 1  | 0.983374000  | -3.917264000 | 0.564251000  |
| 6                             | 4.434208000  | 0.745752000  | 0.269094000  | 16 | -4.398181000 | -0.839994000 | -5.058247000 |
| 6                             | 3.051924000  | 0.835175000  | 0.048386000  | 1  | -5.254289000 | -1.857685000 | -4.813008000 |
| 6                             | 2.536158000  | 1.015287000  | -1.236986000 | 6  | -5.588042000 | -2.952896000 | -1.647079000 |
| 6                             | 3.408519000  | 1.104510000  | -2.326717000 | 6  | -4.233901000 | -3.007400000 | -1.960376000 |
| 6                             | 4.787036000  | 1.005256000  | -2.124671000 | 6  | -3.410347000 | -4.189208000 | -1.853134000 |
| 6                             | 5.293516000  | 0.827092000  | -0.834287000 | 6  | -2.173468000 | -3.848546000 | -2.310792000 |
| 1                             | 6.784653000  | 2.590256000  | 1.620741000  | 6  | -2.239902000 | -2.456494000 | -2.686815000 |
| 1                             | 3.981704000  | 2.335266000  | 2.514701000  | 7  | -3.502801000 | -1.964427000 | -2.463538000 |
| 1                             | 5.999221000  | 0.185379000  | 1.641434000  | 6  | -1.168907000 | -1.721168000 | -3.177203000 |
| 1                             | 4.378689000  | -0.139274000 | 2.232872000  | 6  | -1.207165000 | -0.370412000 | -3.500897000 |
| 1                             | 2.355091000  | 0.765846000  | 0.880067000  | 6  | -0.066184000 | 0.392486000  | -3.945322000 |
| 1                             | 1.458697000  | 1.078921000  | -1.363281000 | 6  | -0.485101000 | 1.680923000  | -4.083967000 |
| 1                             | 3.014191000  | 1.249542000  | -3.328975000 | 6  | -1.887581000 | 1.699533000  | -3.743492000 |
| 1                             | 5.469230000  | 1.059661000  | -2.969495000 | 7  | -2.307227000 | 0.444024000  | -3.400289000 |
| 1                             | 6.368246000  | 0.735611000  | -0.686590000 | 6  | -2.697309000 | 2.829639000  | -3.801763000 |
| 6                             | 1.578553000  | 6.957732000  | -5.470472000 | 6  | -4.069204000 | 2.844505000  | -3.596593000 |
| 6                             | 0.701997000  | 6.482399000  | -4.299298000 | 6  | -4.907259000 | 4.002670000  | -3.805829000 |
| 6                             | -0.787971000 | 6.821577000  | -4.431011000 | 6  | -6.189162000 | 3.600145000  | -3.595127000 |
| 6                             | 1.271060000  | 6.274954000  | -6.808625000 | 6  | -6.131430000 | 2.203626000  | -3.227766000 |
| 1                             | 1.468318000  | 8.046192000  | -5.582841000 | 7  | -4.833117000 | 1.764697000  | -3.234489000 |
| 1                             | 0.820193000  | 5.394670000  | -4.180670000 | 6  | -7.230879000 | 1.431745000  | -2.879551000 |
| 1                             | 1.086600000  | 6.928986000  | -3.371164000 | 6  | -7.175582000 | 0.112691000  | -2.445446000 |
| 1                             | -0.933209000 | 7.904575000  | -4.541158000 | 6  | -8.314643000 | -0.649302000 | -1.995559000 |
| 1                             | -1.235130000 | 6.342351000  | -5.310601000 | 6  | -7.844985000 | -1.869347000 | -1.615216000 |
| 1                             | -1.348541000 | 6.491188000  | -3.549237000 | 6  | -6.421168000 | -1.859773000 | -1.849349000 |
| 1                             | 1.954579000  | 6.618173000  | -7.594068000 | 7  | -6.033293000 | -0.640005000 | -2.350972000 |
| 1                             | 0.250136000  | 6.483477000  | -7.147159000 | 26 | -4.169158000 | -0.057465000 | -2.778726000 |
| 1                             | 1.377065000  | 5.185302000  | -6.728911000 | 1  | -6.043703000 | -3.856589000 | -1.253509000 |
| 6                             | -1.773147000 | 6.708889000  | 0.168010000  | 1  | -0.220642000 | -2.237308000 | -3.290474000 |
| 6                             | -0.471294000 | 6.108028000  | 0.742992000  | 1  | -2.226685000 | 3.772875000  | -4.055828000 |
| 6                             | 0.332439000  | 5.256049000  | -0.249305000 | 1  | -8.207012000 | 1.906363000  | -2.912202000 |
| 6                             | 1.466197000  | 4.470501000  | 0.428683000  | 8  | -1.611734000 | 1.123579000  | 2.092887000  |
| 7                             | 0.931890000  | 3.454835000  | 1.336747000  | 6  | -1.269870000 | 0.790716000  | 0.914941000  |
| 6                             | 1.008014000  | 3.461209000  | 2.662549000  | 8  | -0.392546000 | 1.385587000  | 0.212758000  |
| 7                             | 1.904983000  | 4.250680000  | 3.313304000  | 6  | -1.915829000 | -0.430679000 | 0.300514000  |
| 7                             | 0.149793000  | 2.708134000  | 3.367089000  | 6  | -2.550603000 | -1.462460000 | 1.217070000  |
| 6                             | -2.688655000 | 5.649846000  | -0.446465000 | 6  | -3.865706000 | -1.034929000 | 1.895562000  |
| 8                             | -2.676526000 | 5.444854000  | -1.667605000 | 6  | -4.402992000 | -2.056914000 | 2.910749000  |
| 1                             | -1.537176000 | 7.408638000  | -0.639245000 | 6  | -4.831170000 | -3.400990000 | 2.307255000  |
| 1                             | -0.715985000 | 5.491224000  | 1.615381000  | 1  | -1.274970000 | -0.855137000 | -0.474918000 |
| 1                             | 0.157068000  | 6.928623000  | 1.116178000  | 1  | -2.904500000 | 0.037013000  | -0.511781000 |
| 1                             | -0.327004000 | 4.547890000  | -0.763629000 | 1  | -2.708639000 | -2.382350000 | 0.642058000  |
| 1                             | 0.768699000  | 5.893509000  | -1.030070000 | 1  | -1.820512000 | -1.708574000 | 2.007501000  |
| 1                             | 2.069204000  | 3.957164000  | -0.328491000 | 1  | -4.620888000 | -0.851607000 | 1.119962000  |
| 1                             | 2.134166000  | 5.140909000  | 0.974358000  |    |              |              |              |

|                                   |              |              |              |    |              |              |              |
|-----------------------------------|--------------|--------------|--------------|----|--------------|--------------|--------------|
| 1                                 | -3.687637000 | -0.082729000 | 2.403325000  | 7  | 1.299343000  | 3.345258000  | 1.596412000  |
| 1                                 | -3.642116000 | -2.232252000 | 3.686123000  | 6  | 1.487271000  | 3.425634000  | 2.909968000  |
| 1                                 | -5.265017000 | -1.613645000 | 3.428812000  | 7  | 2.395066000  | 4.291173000  | 3.436640000  |
| 1                                 | -5.592978000 | -3.254279000 | 1.531256000  | 7  | 0.730639000  | 2.672972000  | 3.721089000  |
| 1                                 | -3.988748000 | -3.927848000 | 1.844192000  | 6  | -2.528365000 | 5.290766000  | -0.449778000 |
| 8                                 | -3.844608000 | 0.427399000  | -1.144040000 | 8  | -2.459891000 | 5.066202000  | -1.665044000 |
| 1                                 | -5.254442000 | -4.063654000 | 3.072254000  | 1  | -1.390184000 | 7.060478000  | -0.610631000 |
| 1                                 | 1.176546000  | -6.795582000 | 0.551882000  | 1  | -0.635142000 | 5.183878000  | 1.704379000  |
| 1                                 | 2.634092000  | 6.783716000  | -5.216904000 | 1  | 0.224021000  | 6.635939000  | 1.220857000  |
| 1                                 | -4.911299000 | 4.151213000  | -0.958339000 | 1  | -0.099815000 | 4.151458000  | -0.560884000 |
| 1                                 | -2.288422000 | 7.271852000  | 0.956286000  | 1  | 0.861517000  | 5.571147000  | -0.941246000 |
| 1                                 | 7.634916000  | 4.699520000  | 1.371206000  | 1  | 2.351553000  | 3.828766000  | -0.135479000 |
| 1                                 | 5.268882000  | 1.674232000  | 3.531072000  | 1  | 2.314497000  | 5.107221000  | 1.076651000  |
| 1                                 | -8.398133000 | -2.712303000 | -1.220602000 | 1  | 0.752470000  | 2.504988000  | 1.254599000  |
| 1                                 | -3.753838000 | -5.147554000 | -1.484277000 | 1  | 3.253368000  | 4.496429000  | 2.919790000  |
| 1                                 | -7.099955000 | 4.181867000  | -3.660920000 | 1  | 2.455257000  | 4.346074000  | 4.442705000  |
| 1                                 | -9.332447000 | -0.280956000 | -1.973045000 | 1  | -0.012407000 | 2.030612000  | 3.309226000  |
| 1                                 | -1.284405000 | -4.460928000 | -2.388209000 | 1  | 1.074493000  | 2.469957000  | 4.648772000  |
| 1                                 | 0.919039000  | -0.023275000 | -4.112450000 | 7  | -3.339765000 | 4.562074000  | 0.358929000  |
| 1                                 | -4.535062000 | 4.984505000  | -4.064087000 | 6  | -4.122149000 | 3.437895000  | -0.191292000 |
| 1                                 | 0.082109000  | 2.548883000  | -4.395728000 | 6  | -4.940235000 | 2.930695000  | 1.004807000  |
|                                   |              |              |              | 6  | -4.089194000 | 3.333109000  | 2.221833000  |
|                                   |              |              |              | 6  | -3.534552000 | 4.704527000  | 1.810088000  |
| <sup>4</sup> IM1 <sub>A,c</sub> : |              |              |              | 1  | -3.440383000 | 2.671666000  | -0.575534000 |
| 6                                 | 6.856237000  | 5.270344000  | 0.752542000  | 1  | -5.913177000 | 3.437261000  | 1.041591000  |
| 6                                 | 6.654386000  | 5.231169000  | -0.780791000 | 1  | -5.122541000 | 1.855496000  | 0.936248000  |
| 6                                 | 5.256555000  | 5.632322000  | -1.292501000 | 1  | -4.660170000 | 3.381677000  | 3.154650000  |
| 6                                 | 4.854153000  | 7.050199000  | -0.859580000 | 1  | -3.260261000 | 2.629410000  | 2.363746000  |
| 6                                 | 5.204104000  | 5.487605000  | -2.820895000 | 1  | -2.600700000 | 4.947773000  | 2.321212000  |
| 6                                 | 5.892469000  | 4.362759000  | 1.505621000  | 1  | -4.258060000 | 5.506002000  | 2.026384000  |
| 8                                 | 4.839452000  | 4.797391000  | 1.987371000  | 6  | 0.070722000  | -6.077130000 | 0.010995000  |
| 1                                 | 6.706485000  | 6.282833000  | 1.134746000  | 6  | 0.837108000  | -4.914158000 | -0.578538000 |
| 1                                 | 7.404683000  | 5.897209000  | -1.230133000 | 6  | 1.703208000  | -5.090234000 | -1.665210000 |
| 1                                 | 6.882851000  | 4.219618000  | -1.143166000 | 6  | 2.415095000  | -4.011757000 | -2.199567000 |
| 1                                 | 4.527376000  | 4.929525000  | -0.866493000 | 6  | 2.269467000  | -2.735518000 | -1.653462000 |
| 1                                 | 3.889081000  | 7.327138000  | -1.299794000 | 6  | 1.401340000  | -2.542578000 | -0.573292000 |
| 1                                 | 4.755168000  | 7.129053000  | 0.227777000  | 6  | 0.695990000  | -3.623604000 | -0.044613000 |
| 1                                 | 5.593362000  | 7.790929000  | -1.193819000 | 1  | -1.011168000 | -5.895801000 | -0.012616000 |
| 1                                 | 4.207318000  | 5.735149000  | -3.204087000 | 1  | 0.267541000  | -7.005555000 | -0.535232000 |
| 1                                 | 5.435682000  | 4.462331000  | -3.132732000 | 1  | 1.825787000  | -6.082408000 | -2.094841000 |
| 1                                 | 5.923531000  | 6.160447000  | -3.306362000 | 1  | 3.085461000  | -4.173214000 | -3.040348000 |
| 7                                 | 6.264938000  | 3.058859000  | 1.582384000  | 1  | 2.826238000  | -1.894856000 | -2.058625000 |
| 6                                 | 5.466154000  | 1.990753000  | 2.170478000  | 1  | 1.262580000  | -1.550422000 | -0.151987000 |
| 6                                 | 5.440303000  | 0.725468000  | 1.290790000  | 1  | 0.021283000  | -3.461597000 | 0.793154000  |
| 6                                 | 4.748027000  | 0.915629000  | -0.042698000 | 16 | -4.653232000 | -0.768026000 | -5.377882000 |
| 6                                 | 3.348061000  | 0.930131000  | -0.116686000 | 1  | -4.403075000 | -2.096288000 | -5.368989000 |
| 6                                 | 2.693655000  | 1.133332000  | -1.333517000 | 6  | -6.078735000 | -3.289113000 | -2.250873000 |
| 6                                 | 3.439418000  | 1.319393000  | -2.502065000 | 6  | -4.705726000 | -3.352493000 | -2.446503000 |
| 6                                 | 4.835056000  | 1.296079000  | -2.445156000 | 6  | -3.912923000 | -4.543245000 | -2.271190000 |
| 6                                 | 5.481879000  | 1.096457000  | -1.222510000 | 6  | -2.620412000 | -4.202170000 | -2.535011000 |
| 1                                 | 7.149129000  | 2.800607000  | 1.165514000  | 6  | -2.617251000 | -2.799410000 | -2.864094000 |
| 1                                 | 4.456836000  | 2.383668000  | 2.305094000  | 7  | -3.900962000 | -2.307057000 | -2.825532000 |
| 1                                 | 6.470761000  | 0.375558000  | 1.136371000  | 6  | -1.469343000 | -2.065702000 | -3.126143000 |
| 1                                 | 4.935199000  | -0.058992000 | 1.868127000  | 6  | -1.440504000 | -0.696102000 | -3.347852000 |
| 1                                 | 2.744027000  | 0.780031000  | 0.774192000  | 6  | -0.243681000 | 0.062586000  | -3.610542000 |
| 1                                 | 1.607414000  | 1.132484000  | -1.346314000 | 6  | -0.625705000 | 1.360421000  | -3.771141000 |
| 1                                 | 2.936705000  | 1.476500000  | -3.452985000 | 6  | -2.058462000 | 1.397396000  | -3.621569000 |
| 1                                 | 5.421253000  | 1.424665000  | -3.351672000 | 7  | -2.531074000 | 0.138176000  | -3.344019000 |
| 1                                 | 6.569551000  | 1.063446000  | -1.189746000 | 6  | -2.833969000 | 2.535444000  | -3.785329000 |
| 6                                 | 1.653587000  | 7.524018000  | -5.145950000 | 6  | -4.219895000 | 2.556772000  | -3.762336000 |
| 6                                 | 0.834985000  | 6.798206000  | -4.064428000 | 6  | -5.009699000 | 3.747158000  | -3.950338000 |
| 6                                 | -0.682410000 | 6.817302000  | -4.287587000 | 6  | -6.316147000 | 3.374030000  | -3.850802000 |
| 6                                 | 1.577643000  | 6.879300000  | -6.535301000 | 6  | -6.328868000 | 1.958274000  | -3.578758000 |
| 1                                 | 1.317003000  | 8.569059000  | -5.209942000 | 7  | -5.044436000 | 1.477732000  | -3.550234000 |
| 1                                 | 1.180254000  | 5.755813000  | -3.991994000 | 6  | -7.475178000 | 1.222503000  | -3.312064000 |
| 1                                 | 1.056636000  | 7.258547000  | -3.090689000 | 6  | -7.488503000 | -0.109385000 | -2.930206000 |
| 1                                 | -1.051842000 | 7.848690000  | -4.364660000 | 6  | -8.683837000 | -0.857170000 | -2.625331000 |
| 1                                 | -0.960333000 | 6.300986000  | -5.214358000 | 6  | -8.289196000 | -2.119896000 | -2.306087000 |
| 1                                 | -1.210965000 | 6.328938000  | -3.461248000 | 6  | -6.851745000 | -2.151667000 | -2.425778000 |
| 1                                 | 2.213304000  | 7.411022000  | -7.253044000 | 7  | -6.385956000 | -0.913270000 | -2.787596000 |
| 1                                 | 0.556562000  | 6.886184000  | -6.932390000 | 26 | -4.474699000 | -0.394431000 | -3.099380000 |
| 1                                 | 1.913446000  | 5.834802000  | -6.503842000 | 1  | -6.586955000 | -4.203106000 | -1.960773000 |
| 6                                 | -1.653877000 | 6.366259000  | 0.192867000  | 1  | -0.522546000 | -2.594963000 | -3.123555000 |
| 6                                 | -0.369583000 | 5.795696000  | 0.834264000  | 1  | -2.323838000 | 3.479511000  | -3.934589000 |
| 6                                 | 0.497082000  | 4.952714000  | -0.109905000 | 1  | -8.428636000 | 1.736536000  | -3.378689000 |
| 6                                 | 1.711771000  | 4.332125000  | 0.597759000  |    |              |              |              |





|                 |              |              |               |   |              |              |               |
|-----------------|--------------|--------------|---------------|---|--------------|--------------|---------------|
| 6               | -2.389578000 | -6.123874000 | -0.103789000  | 1 | 6.131806000  | 6.758726000  | -2.397957000  |
| 7               | -2.551858000 | -5.116342000 | -1.124007000  | 1 | 6.041158000  | 3.604598000  | -1.896770000  |
| 6               | -3.730090000 | -4.431694000 | -0.938926000  | 1 | 7.092071000  | 3.566553000  | -0.473496000  |
| 6               | -1.638875000 | -4.858965000 | -2.138715000  | 1 | 7.544260000  | 4.541589000  | -1.886860000  |
| 6               | -1.768095000 | -3.871095000 | -3.114439000  | 7 | 5.433002000  | 6.627595000  | 3.110719000   |
| 6               | -0.792135000 | -3.597957000 | -4.141834000  | 6 | 4.505581000  | 6.142878000  | 4.124114000   |
| 6               | -1.289493000 | -2.567649000 | -4.882214000  | 6 | 4.880734000  | 4.750187000  | 4.668420000   |
| 6               | -2.567432000 | -2.224320000 | -4.304316000  | 6 | 4.836364000  | 3.646354000  | 3.630895000   |
| 7               | -2.835683000 | -3.024882000 | -3.228165000  | 6 | 3.611075000  | 3.200452000  | 3.113778000   |
| 6               | -3.409136000 | -1.233795000 | -4.807224000  | 6 | 3.556021000  | 2.200558000  | 2.141394000   |
| 6               | -4.662823000 | -0.895217000 | -4.308631000  | 6 | 4.741725000  | 1.621439000  | 1.678610000   |
| 6               | -5.512416000 | 0.127917000  | -4.876087000  | 6 | 5.969143000  | 2.047185000  | 2.188991000   |
| 6               | -6.647195000 | 0.147149000  | -4.123801000  | 6 | 6.013622000  | 3.055550000  | 3.155657000   |
| 6               | -6.480113000 | -0.862469000 | -3.102717000  | 1 | 6.419376000  | 6.595054000  | 3.330743000   |
| 7               | -5.272468000 | -1.483365000 | -3.233405000  | 1 | 3.518786000  | 6.118175000  | 3.659009000   |
| 6               | -7.423887000 | -1.163322000 | -2.120394000  | 1 | 5.880680000  | 4.798280000  | 5.120976000   |
| 6               | -7.277985000 | -2.120476000 | -1.126964000  | 1 | 4.186373000  | 4.528741000  | 5.490220000   |
| 6               | -8.250523000 | -2.393049000 | -0.094964000  | 1 | 2.682181000  | 3.635213000  | 3.478066000   |
| 6               | -7.712864000 | -3.351373000 | 0.706242000   | 1 | 2.595285000  | 1.882971000  | 1.742699000   |
| 6               | -6.414708000 | -3.627654000 | 0.159944000   | 1 | 4.703372000  | 0.836991000  | 0.928026000   |
| 7               | -6.171112000 | -2.921164000 | -0.963630000  | 1 | 6.893382000  | 1.592755000  | 1.840765000   |
| 26              | -4.476895000 | -2.919819000 | -2.053215000  | 1 | 6.973812000  | 3.377073000  | 3.554070000   |
| 1               | -5.874925000 | -5.131121000 | 1.593868000   | 6 | 3.289000000  | 0.194405000  | -2.077116000  |
| 1               | -0.741226000 | -5.469748000 | -2.166747000  | 6 | 2.265502000  | 1.211825000  | -2.610064000  |
| 1               | -3.055415000 | -0.681034000 | -5.672664000  | 6 | 1.232866000  | 0.627989000  | -3.582003000  |
| 1               | -8.347855000 | -0.592165000 | -2.127532000  | 6 | 2.677396000  | -0.867852000 | -1.154366000  |
| 8               | -0.410417000 | 2.747260000  | 1.566666000   | 1 | 3.800815000  | -0.292896000 | -2.920842000  |
| 6               | 0.305307000  | 2.151107000  | 0.702776000   | 1 | 1.739700000  | 1.655831000  | -1.754905000  |
| 8               | 1.009375000  | 2.705642000  | -0.186666000  | 1 | 2.803592000  | 2.027208000  | -3.114614000  |
| 6               | 0.341274000  | 0.599347000  | 0.774837000   | 1 | 1.723960000  | 0.192551000  | -4.464151000  |
| 6               | -0.988152000 | -0.039520000 | 1.001423000   | 1 | 0.638074000  | -0.161787000 | -3.108169000  |
| 6               | -1.645790000 | -0.091472000 | 2.343590000   | 1 | 0.539283000  | 1.405095000  | -3.920541000  |
| 6               | -2.643802000 | -1.255194000 | 2.502680000   | 1 | 3.449147000  | -1.526321000 | -0.736056000  |
| 6               | -1.965599000 | -2.629292000 | 2.543950000   | 1 | 1.957778000  | -1.501966000 | -1.684841000  |
| 1               | 0.807570000  | 0.239429000  | -0.148159000  | 1 | 2.143301000  | -0.389329000 | -0.324793000  |
| 1               | 1.024671000  | 0.356343000  | 1.604910000   | 6 | -1.426005000 | 5.573765000  | -2.905104000  |
| 1               | -2.875143000 | -1.976834000 | -0.708842000  | 6 | -0.502997000 | 5.749363000  | -1.678387000  |
| 1               | -1.622542000 | -0.201706000 | 0.129720000   | 6 | 0.859052000  | 5.055147000  | -1.809192000  |
| 1               | -2.169810000 | 0.862918000  | 2.527035000   | 6 | 1.736321000  | 5.212561000  | -0.556471000  |
| 1               | -0.877940000 | -0.150953000 | 3.131545000   | 7 | 1.106497000  | 4.598252000  | 0.612136000   |
| 1               | -3.225308000 | -1.108191000 | 3.423416000   | 6 | 0.682952000  | 5.235304000  | 1.698229000   |
| 1               | -3.360691000 | -1.126999000 | 1.671093000   | 7 | 1.153597000  | 6.471243000  | 2.013936000   |
| 1               | -1.367248000 | -2.798777000 | 1.640529000   | 7 | -0.252604000 | 4.657003000  | 2.462750000   |
| 1               | -1.288540000 | -2.711303000 | 3.404602000   | 6 | -1.717068000 | 4.107935000  | -3.222951000  |
| 8               | -3.732257000 | -1.634330000 | -1.015601000  | 8 | -1.003490000 | 3.492582000  | -4.025702000  |
| 1               | -2.700216000 | -3.439682000 | 2.615503000   | 1 | -0.937936000 | 5.982913000  | -3.795247000  |
| 1               | -3.420877000 | -0.445081000 | -11.064557000 | 1 | -1.010614000 | 5.368472000  | -0.783820000  |
| 1               | 4.163874000  | 0.211077000  | -2.582633000  | 1 | -0.351468000 | 6.825553000  | -1.513595000  |
| 1               | -2.575662000 | 1.845818000  | -3.697570000  | 1 | 0.718916000  | 3.989205000  | -2.018208000  |
| 1               | -2.480438000 | 6.305191000  | -3.241446000  | 1 | 1.410736000  | 5.465173000  | -2.665818000  |
| 1               | 6.773381000  | 6.388502000  | 0.940116000   | 1 | 2.708064000  | 4.733443000  | -0.719361000  |
| 1               | 4.114005000  | 7.906132000  | 4.141010000   | 1 | 1.928495000  | 6.267878000  | -0.348152000  |
| 1               | -8.140524000 | -3.810530000 | 1.588402000   | 1 | 0.855661000  | 3.576143000  | 0.550320000   |
| 1               | -3.718839000 | -6.629408000 | 1.580141000   | 1 | 2.121886000  | 6.721389000  | 1.796065000   |
| 1               | -7.522169000 | 0.774865000  | -4.236111000  | 1 | 0.727044000  | 6.950947000  | 2.792673000   |
| 1               | -9.210045000 | -1.899729000 | -0.006048000  | 1 | -0.737245000 | 3.774576000  | 2.127021000   |
| 1               | -1.545767000 | -6.797821000 | -0.029877000  | 1 | -0.372657000 | 4.961905000  | 3.417227000   |
| 1               | 0.142006000  | -4.130453000 | -4.266181000  | 7 | -2.744922000 | 3.504583000  | -2.574876000  |
| 1               | -5.252259000 | 0.731108000  | -5.736311000  | 6 | -3.027891000 | 2.072402000  | -2.791175000  |
| 1               | -0.852842000 | -2.075818000 | -5.741357000  | 6 | -4.312147000 | 1.822583000  | -1.985518000  |
|                 |              |              |               | 6 | -4.246689000 | 2.879526000  | -0.869283000  |
|                 |              |              |               | 6 | -3.655026000 | 4.102723000  | -1.584873000  |
|                 |              |              |               | 1 | -2.184600000 | 1.474591000  | -2.424116000  |
|                 |              |              |               | 1 | -5.190248000 | 1.998197000  | -2.619657000  |
|                 |              |              |               | 1 | -4.376102000 | 0.796651000  | -1.611615000  |
|                 |              |              |               | 1 | -5.221883000 | 3.095053000  | -0.421238000  |
|                 |              |              |               | 1 | -3.565446000 | 2.563052000  | -0.070918000  |
|                 |              |              |               | 1 | -3.120341000 | 4.765091000  | -0.899586000  |
|                 |              |              |               | 1 | -4.439252000 | 4.690452000  | -2.086360000  |
|                 |              |              |               | 6 | -2.795336000 | -0.826121000 | -10.136220000 |
|                 |              |              |               | 6 | -2.420481000 | 0.076821000  | -8.983380000  |
|                 |              |              |               | 6 | -3.165260000 | 1.228445000  | -8.694869000  |
|                 |              |              |               | 6 | -2.800867000 | 2.077345000  | -7.645913000  |
|                 |              |              |               | 6 | -1.682766000 | 1.791096000  | -6.858576000  |
|                 |              |              |               | 6 | -0.933261000 | 0.643903000  | -7.139070000  |
| <b>4IM1A,B:</b> |              |              |               |   |              |              |               |
| 6               | 6.247363000  | 7.434044000  | 0.962105000   |   |              |              |               |
| 6               | 6.878293000  | 6.218520000  | 0.243466000   |   |              |              |               |
| 6               | 5.943151000  | 5.415940000  | -0.682685000  |   |              |              |               |
| 6               | 5.342726000  | 6.281519000  | -1.800930000  |   |              |              |               |
| 6               | 6.699553000  | 4.213315000  | -1.266585000  |   |              |              |               |
| 6               | 5.082177000  | 7.057154000  | 1.868855000   |   |              |              |               |
| 8               | 3.910150000  | 7.133160000  | 1.482729000   |   |              |              |               |
| 1               | 5.865387000  | 8.155811000  | 0.236247000   |   |              |              |               |
| 1               | 7.731441000  | 6.587493000  | -0.343392000  |   |              |              |               |
| 1               | 7.294490000  | 5.536912000  | 0.997870000   |   |              |              |               |
| 1               | 5.116509000  | 5.025475000  | -0.072970000  |   |              |              |               |
| 1               | 4.740633000  | 5.669322000  | -2.482480000  |   |              |              |               |
| 1               | 4.693015000  | 7.066859000  | -1.401379000  |   |              |              |               |

|    |              |              |               |   |              |              |              |
|----|--------------|--------------|---------------|---|--------------|--------------|--------------|
| 6  | -1.300140000 | -0.202797000 | -8.187176000  | 6 | 6.080058000  | 5.872329000  | 0.929001000  |
| 1  | -2.598961000 | -1.878572000 | -9.902808000  | 6 | 6.334578000  | 4.348187000  | 1.005133000  |
| 1  | -3.855703000 | -0.730146000 | -10.393066000 | 6 | 5.263330000  | 3.466256000  | 0.338307000  |
| 1  | -4.039266000 | 1.462260000  | -9.299876000  | 6 | 5.258941000  | 3.634546000  | -1.187677000 |
| 1  | -3.394763000 | 2.964954000  | -7.441016000  | 6 | 5.472303000  | 1.994077000  | 0.723374000  |
| 1  | -1.403603000 | 2.440744000  | -6.033482000  | 6 | 4.903220000  | 6.324884000  | 1.778298000  |
| 1  | -0.058144000 | 0.413222000  | -6.536482000  | 8 | 3.790299000  | 6.571455000  | 1.291012000  |
| 1  | -0.709349000 | -1.093265000 | -8.393778000  | 1 | 5.877901000  | 6.185245000  | -0.098068000 |
| 16 | -5.031598000 | -5.093916000 | -3.341253000  | 1 | 7.306793000  | 4.142539000  | 0.536968000  |
| 1  | -5.038958000 | -4.460505000 | -4.535066000  | 1 | 6.434658000  | 4.058049000  | 2.060148000  |
| 6  | -6.785668000 | -4.675997000 | 0.334447000   | 1 | 4.281597000  | 3.775654000  | 0.725392000  |
| 6  | -5.445035000 | -5.035344000 | 0.342661000   | 1 | 4.453789000  | 3.051146000  | -1.643115000 |
| 6  | -4.854977000 | -5.951790000 | 1.284800000   | 1 | 5.118058000  | 4.677586000  | -1.493438000 |
| 6  | -3.527990000 | -6.026682000 | 0.986352000   | 1 | 6.205559000  | 3.285942000  | -1.620241000 |
| 6  | -3.301324000 | -5.152860000 | -0.136601000  | 1 | 4.722718000  | 1.352367000  | 0.246775000  |
| 7  | -4.485263000 | -4.570671000 | -0.519950000  | 1 | 5.396283000  | 1.852327000  | 1.807908000  |
| 6  | -2.058025000 | -4.919145000 | -0.706344000  | 1 | 6.461232000  | 1.640436000  | 0.403787000  |
| 6  | -1.814420000 | -4.041719000 | -1.752552000  | 7 | 5.167555000  | 6.422176000  | 3.105779000  |
| 6  | -0.522674000 | -3.828223000 | -2.355509000  | 6 | 4.200100000  | 6.781143000  | 4.131061000  |
| 6  | -0.701072000 | -2.933840000 | -3.366867000  | 6 | 4.205505000  | 5.806908000  | 5.320295000  |
| 6  | -2.103501000 | -2.597940000 | -3.386337000  | 6 | 3.765100000  | 4.388489000  | 5.013067000  |
| 7  | -2.757887000 | -3.267303000 | -2.382777000  | 6 | 2.477844000  | 4.124348000  | 4.522938000  |
| 6  | -2.696647000 | -1.762162000 | -4.322511000  | 6 | 2.058365000  | 2.820233000  | 4.260845000  |
| 6  | -4.056773000 | -1.503042000 | -4.403733000  | 6 | 2.926515000  | 1.748881000  | 4.487697000  |
| 6  | -4.653380000 | -0.625659000 | -5.380515000  | 6 | 4.205820000  | 1.993904000  | 4.987422000  |
| 6  | -5.991196000 | -0.607105000 | -5.124431000  | 6 | 4.617211000  | 3.303398000  | 5.250025000  |
| 6  | -6.217291000 | -1.468129000 | -3.990922000  | 1 | 6.110108000  | 6.216147000  | 3.409320000  |
| 7  | -5.029651000 | -2.020851000 | -3.579924000  | 1 | 3.222643000  | 6.801961000  | 3.647241000  |
| 6  | -7.453851000 | -1.665149000 | -3.390694000  | 1 | 5.209942000  | 5.790450000  | 5.764025000  |
| 6  | -7.672418000 | -2.441675000 | -2.266615000  | 1 | 3.551709000  | 6.240495000  | 6.090341000  |
| 6  | -8.963073000 | -2.640330000 | -1.652073000  | 1 | 1.791737000  | 4.952110000  | 4.355476000  |
| 6  | -8.772139000 | -3.478349000 | -0.597579000  | 1 | 1.052875000  | 2.635398000  | 3.891366000  |
| 6  | -7.365402000 | -3.798582000 | -0.567381000  | 1 | 2.603151000  | 0.731676000  | 4.286666000  |
| 7  | -6.715062000 | -3.143830000 | -1.582434000  | 1 | 4.882417000  | 1.166561000  | 5.182891000  |
| 26 | -4.750230000 | -3.221864000 | -1.995007000  | 1 | 5.604411000  | 3.480452000  | 5.670137000  |
| 1  | -7.429478000 | -5.125900000 | 1.083260000   | 6 | 2.827095000  | -0.380679000 | -2.252004000 |
| 1  | -1.210541000 | -5.460480000 | -0.298480000  | 6 | 1.965825000  | 0.848050000  | -2.594454000 |
| 1  | -2.055012000 | -1.285586000 | -5.056437000  | 6 | 1.157859000  | 0.717854000  | -3.889361000 |
| 1  | -8.309522000 | -1.163010000 | -3.833522000  | 6 | 2.020433000  | -1.616632000 | -1.837447000 |
| 8  | -1.432198000 | 2.411711000  | 1.542158000   | 1 | 3.459649000  | -0.627155000 | -3.117297000 |
| 6  | -0.641117000 | 1.637208000  | 0.932058000   | 1 | 1.285078000  | 1.049350000  | -1.755007000 |
| 8  | 0.527478000  | 1.930461000  | 0.537563000   | 1 | 2.624950000  | 1.725710000  | -2.678671000 |
| 6  | -1.134137000 | 0.194605000  | 0.614316000   | 1 | 1.827118000  | 0.587745000  | -4.749425000 |
| 6  | -2.403845000 | -0.198726000 | 1.295349000   | 1 | 0.483603000  | -0.144884000 | -3.868284000 |
| 6  | -2.391614000 | -0.551249000 | 2.750942000   | 1 | 0.544659000  | 1.609520000  | -4.065392000 |
| 6  | -3.761366000 | -0.910779000 | 3.348647000   | 1 | 2.680686000  | -2.460437000 | -1.603735000 |
| 6  | -4.377843000 | -2.190445000 | 2.773817000   | 1 | 1.331456000  | -1.941922000 | -2.623226000 |
| 1  | -1.226269000 | 0.137835000  | -0.479408000  | 1 | 1.417803000  | -1.409505000 | -0.943465000 |
| 1  | -0.309672000 | -0.481181000 | 0.880042000   | 6 | -1.455354000 | 5.768388000  | -3.009922000 |
| 1  | -3.565121000 | -1.795570000 | -0.586985000  | 6 | -0.501386000 | 5.889790000  | -1.801609000 |
| 1  | -3.344577000 | 0.139427000  | 0.864831000   | 6 | 0.721333000  | 4.964392000  | -1.879814000 |
| 1  | -1.977499000 | 0.309875000  | 3.306889000   | 6 | 1.597199000  | 5.001127000  | -0.623658000 |
| 1  | -1.682511000 | -1.378214000 | 2.930613000   | 7 | 0.846803000  | 4.560970000  | 0.570736000  |
| 1  | -3.654214000 | -1.013395000 | 4.437570000   | 6 | 0.448551000  | 5.338366000  | 1.573685000  |
| 1  | -4.448975000 | -0.068481000 | 3.187329000   | 7 | 1.026355000  | 6.536874000  | 1.783445000  |
| 1  | -4.564382000 | -2.099294000 | 1.698706000   | 7 | -0.577323000 | 4.961178000  | 2.367409000  |
| 1  | -3.714069000 | -3.051540000 | 2.926121000   | 6 | -1.768230000 | 4.308509000  | -3.339553000 |
| 8  | -4.494854000 | -1.835133000 | -0.882555000  | 8 | -1.103590000 | 3.723213000  | -4.203191000 |
| 1  | -5.334581000 | -2.419689000 | 3.259132000   | 1 | -0.976915000 | 6.178405000  | -3.903677000 |
| 1  | -2.218184000 | -0.582304000 | -11.038596000 | 1 | -1.060117000 | 5.668669000  | -0.883456000 |
| 1  | 4.067356000  | 0.739080000  | -1.523212000  | 1 | -0.171180000 | 6.933926000  | -1.713759000 |
| 1  | -3.134613000 | 1.861541000  | -3.858790000  | 1 | 0.406048000  | 3.931683000  | -2.065381000 |
| 1  | -2.352338000 | 6.137768000  | -2.743640000  | 1 | 1.351246000  | 5.237805000  | -2.735502000 |
| 1  | 7.023869000  | 7.941526000  | 1.549570000   | 1 | 2.453801000  | 4.332058000  | -0.736451000 |
| 1  | 4.463677000  | 6.859929000  | 4.956021000   | 1 | 1.993414000  | 5.998428000  | -0.436527000 |
| 1  | -9.503781000 | -3.863205000 | 0.101390000   | 1 | 0.439873000  | 3.626984000  | 0.509342000  |
| 1  | -5.399843000 | -6.457955000 | 2.071391000   | 1 | 2.025788000  | 6.663971000  | 1.573440000  |
| 1  | -6.768392000 | -0.056925000 | -5.639762000  | 1 | 0.615811000  | 7.150995000  | 2.471394000  |
| 1  | -9.884265000 | -2.190783000 | -2.000414000  | 1 | -1.008114000 | 4.039026000  | 2.268869000  |
| 1  | -2.757004000 | -6.606638000 | 1.477401000   | 1 | -0.637468000 | 5.359452000  | 3.294002000  |
| 1  | 0.390817000  | -4.314744000 | -2.038339000  | 7 | -2.716888000 | 3.675241000  | -2.607709000 |
| 1  | -4.102656000 | -0.097253000 | -6.148211000  | 6 | -2.990595000 | 2.235266000  | -2.820376000 |
| 1  | 0.033957000  | -2.533082000 | -4.052708000  | 6 | -4.236440000 | 1.956810000  | -1.970147000 |
|    |              |              |               | 6 | -4.156658000 | 3.019540000  | -0.859060000 |
|    |              |              |               | 6 | -3.588255000 | 4.258363000  | -1.574622000 |

4TS2<sub>DC,A</sub>:













|   |              |              |              |    |              |              |               |
|---|--------------|--------------|--------------|----|--------------|--------------|---------------|
| 1 | 3.179500000  | 3.473490000  | 1.628077000  | 6  | -3.434350000 | 2.172321000  | -7.702729000  |
| 1 | 3.061501000  | 2.480362000  | -0.607141000 | 6  | -2.098727000 | 1.968273000  | -7.347895000  |
| 1 | 4.248885000  | 3.789924000  | -0.653544000 | 6  | -1.436189000 | 0.833490000  | -7.825732000  |
| 1 | 4.799592000  | 2.108660000  | -0.590783000 | 6  | -2.101232000 | -0.081191000 | -8.645167000  |
| 1 | 2.839301000  | 1.005152000  | 1.459446000  | 1  | -3.835719000 | -1.892773000 | -9.727153000  |
| 1 | 3.666020000  | 1.441039000  | 2.964392000  | 1  | -5.235893000 | -0.810055000 | -9.799772000  |
| 1 | 4.585788000  | 0.748429000  | 1.612525000  | 1  | -5.137076000 | 1.427902000  | -8.796391000  |
| 7 | 4.524212000  | 5.895073000  | 3.635638000  | 1  | -3.963484000 | 3.050220000  | -7.339811000  |
| 6 | 3.576949000  | 6.647376000  | 4.445299000  | 1  | -1.582741000 | 2.673575000  | -6.701799000  |
| 6 | 3.124024000  | 5.888367000  | 5.698966000  | 1  | -0.397504000 | 0.663224000  | -7.554510000  |
| 6 | 2.396173000  | 4.568469000  | 5.492638000  | 1  | -1.573861000 | -0.959097000 | -9.014088000  |
| 6 | 1.681927000  | 4.265199000  | 4.325227000  | 16 | -5.285503000 | -4.655676000 | -2.819879000  |
| 6 | 0.982641000  | 3.060178000  | 4.197442000  | 1  | -6.055103000 | -4.021290000 | -3.733220000  |
| 6 | 0.988624000  | 2.138021000  | 5.245744000  | 6  | -4.805087000 | -3.970317000 | 1.240370000   |
| 6 | 1.698690000  | 2.423890000  | 6.413440000  | 6  | -3.643144000 | -4.383543000 | 0.581855000   |
| 6 | 2.396736000  | 3.626062000  | 6.531045000  | 6  | -2.686211000 | -5.325000000 | 1.120235000   |
| 1 | 5.239115000  | 5.367524000  | 4.118240000  | 6  | -1.685869000 | -5.451825000 | 0.202297000   |
| 1 | 2.733749000  | 6.892020000  | 3.796791000  | 6  | -2.013802000 | -4.586744000 | -0.909026000  |
| 1 | 3.996522000  | 5.716441000  | 6.345415000  | 7  | -3.206834000 | -3.954043000 | -0.650551000  |
| 1 | 2.480882000  | 6.575481000  | 6.268955000  | 6  | -1.205839000 | -4.398647000 | -2.819879000  |
| 1 | 1.682940000  | 4.962538000  | 3.492555000  | 6  | -1.462507000 | -3.555011000 | -3.117891000  |
| 1 | 0.441595000  | 2.835857000  | 3.280761000  | 6  | -0.629011000 | -3.387935000 | -4.291586000  |
| 1 | 0.448082000  | 1.200558000  | 5.148777000  | 6  | -1.279698000 | -2.515854000 | -5.116260000  |
| 1 | 1.714149000  | 1.709406000  | 7.232384000  | 6  | -2.515420000 | -2.155102000 | -4.451415000  |
| 1 | 2.948129000  | 3.839370000  | 7.444995000  | 7  | -2.580019000 | -2.780686000 | -3.239428000  |
| 6 | 3.365958000  | 0.029017000  | -3.526457000 | 6  | -3.522917000 | -1.341948000 | -4.975670000  |
| 6 | 2.361486000  | 1.177718000  | -3.723518000 | 6  | -4.751755000 | -1.045518000 | -4.379083000  |
| 6 | 1.303167000  | 0.919668000  | -4.803381000 | 6  | -5.745260000 | -0.164133000 | -4.954170000  |
| 6 | 2.756693000  | -1.249907000 | -2.938492000 | 6  | -6.771999000 | -0.081051000 | -4.061665000  |
| 1 | 3.841299000  | -0.204298000 | -4.491072000 | 6  | -6.418661000 | -0.905409000 | -2.925462000  |
| 1 | 1.858669000  | 1.399098000  | -2.771968000 | 7  | -5.197388000 | -1.490867000 | -3.157995000  |
| 1 | 2.919927000  | 2.086151000  | -3.990673000 | 6  | -7.183873000 | -1.020729000 | -1.761148000  |
| 1 | 1.776077000  | 0.725676000  | -5.776626000 | 6  | -6.853128000 | -1.732309000 | -0.604931000  |
| 1 | 0.675501000  | 0.053368000  | -4.562022000 | 6  | -7.691381000 | -1.908574000 | 0.561428000   |
| 1 | 0.645171000  | 1.788232000  | -4.909840000 | 6  | -7.017445000 | -2.738347000 | 1.411778000   |
| 1 | 3.514530000  | -2.034574000 | -2.821295000 | 6  | -5.765982000 | -3.072714000 | 0.766702000   |
| 1 | 1.958213000  | -1.651312000 | -3.572464000 | 7  | -5.683184000 | -2.420962000 | -0.433467000  |
| 1 | 2.324681000  | -1.056344000 | -1.948163000 | 26 | -4.230882000 | -2.783717000 | -1.950541000  |
| 6 | -1.131357000 | 6.150328000  | -3.978918000 | 1  | -4.991734000 | -4.420199000 | 2.211590000   |
| 6 | -0.288847000 | 6.493374000  | -2.730126000 | 1  | -0.285338000 | -4.974654000 | -2.067624000  |
| 6 | 1.051846000  | 5.747933000  | -2.634143000 | 1  | -3.338076000 | -0.895790000 | -5.948504000  |
| 6 | 1.682880000  | 5.862706000  | -1.238669000 | 1  | -8.137415000 | -0.499880000 | -1.759899000  |
| 7 | 0.872305000  | 5.144892000  | -0.250473000 | 8  | -1.003406000 | 2.400393000  | 1.057037000   |
| 6 | 0.372845000  | 5.661169000  | 0.861749000  | 6  | -0.287941000 | 1.875319000  | 0.147744000   |
| 7 | 0.814676000  | 6.876544000  | 1.316841000  | 8  | 0.381720000  | 2.502461000  | -0.727686000  |
| 7 | -0.618454000 | 5.024719000  | 1.508516000  | 6  | -0.183394000 | 0.372976000  | 0.106366000   |
| 6 | -1.372671000 | 4.647572000  | -4.116915000 | 6  | -0.642286000 | -0.418955000 | 1.088130000   |
| 8 | -0.661824000 | 3.974765000  | -4.874019000 | 6  | -0.463302000 | -1.910797000 | 1.159994000   |
| 1 | -0.600684000 | 6.454194000  | -4.885969000 | 6  | 0.455880000  | -2.371175000 | 2.314633000   |
| 1 | -0.875012000 | 6.272260000  | -1.830535000 | 6  | -0.086425000 | -2.063756000 | 3.714651000   |
| 1 | -0.108007000 | 7.577061000  | -2.716530000 | 1  | -2.425973000 | -0.805866000 | -0.658454000  |
| 1 | 0.919728000  | 4.687837000  | -2.878010000 | 1  | 0.355276000  | -0.039242000 | -0.745685000  |
| 1 | 1.761747000  | 6.145550000  | -3.371017000 | 1  | -3.907880000 | -0.848020000 | -0.186979000  |
| 1 | 2.694511000  | 5.444685000  | -1.238794000 | 1  | -1.158219000 | 0.072140000  | 1.913244000   |
| 1 | 1.761284000  | 6.910045000  | -0.935158000 | 1  | -0.054568000 | -2.279812000 | 0.211611000   |
| 1 | 0.618174000  | 4.143650000  | -0.469173000 | 1  | -1.440995000 | -2.397434000 | 1.290316000   |
| 1 | 1.831581000  | 6.982983000  | 1.337107000  | 1  | 0.600931000  | -3.454889000 | 2.215913000   |
| 1 | 0.351667000  | 7.218761000  | 2.148521000  | 1  | 1.443913000  | -1.908570000 | 2.190065000   |
| 1 | -0.850789000 | 4.025882000  | 1.236009000  | 1  | -0.185585000 | -0.985067000 | 3.883302000   |
| 1 | -0.728157000 | 5.230641000  | 2.492817000  | 1  | -1.075200000 | -2.515903000 | 3.863436000   |
| 7 | -2.330574000 | 4.078537000  | -3.342468000 | 8  | -3.345649000 | -0.851883000 | -0.980121000  |
| 6 | -2.480402000 | 2.608331000  | -3.303473000 | 1  | 0.580564000  | -2.458918000 | 4.489639000   |
| 6 | -3.745880000 | 2.389902000  | -2.463480000 | 1  | -3.928548000 | -0.650048000 | -10.977054000 |
| 6 | -3.766290000 | 3.612178000  | -1.530947000 | 1  | 4.174023000  | 0.371250000  | -2.864327000  |
| 6 | -3.279224000 | 4.751044000  | -2.440639000 | 1  | -2.555456000 | 2.202605000  | -4.315118000  |
| 1 | -1.590915000 | 2.176412000  | -2.829452000 | 1  | -2.076326000 | 6.706659000  | -3.941127000  |
| 1 | -4.632539000 | 2.389405000  | -3.109560000 | 1  | 6.533441000  | 5.210195000  | 2.040652000   |
| 1 | -3.720389000 | 1.436909000  | -1.929573000 | 1  | 4.022154000  | 7.602849000  | 4.756116000   |
| 1 | -4.752570000 | 3.819403000  | -1.103075000 | 1  | -7.339967000 | -3.108295000 | 2.377249000   |
| 1 | -3.059229000 | 3.464645000  | -0.705944000 | 1  | -2.779194000 | -5.816738000 | 2.080545000   |
| 1 | -2.804750000 | 5.559092000  | -1.878626000 | 1  | -7.684455000 | 0.496691000  | -4.141966000  |
| 1 | -4.114621000 | 5.183404000  | -3.012466000 | 1  | -8.671781000 | -1.468779000 | 0.697160000   |
| 6 | -4.148672000 | -0.860805000 | -9.921623000 | 1  | -0.797137000 | -6.067589000 | 0.262290000   |
| 6 | -3.442483000 | 0.114852000  | -9.007955000 | 1  | 0.319501000  | -3.883144000 | -4.458289000  |
| 6 | -4.097884000 | 1.254759000  | -8.522507000 | 1  | -5.638887000 | 0.331059000  | -5.911011000  |

|                |              |              |              |    |              |              |              |
|----------------|--------------|--------------|--------------|----|--------------|--------------|--------------|
| 1              | -0.971173000 | -2.152902000 | -6.088198000 | 6  | -3.520912000 | 0.784530000  | -0.625033000 |
|                |              |              |              | 6  | -3.566581000 | 1.395054000  | 0.795439000  |
|                |              |              |              | 6  | -2.938066000 | 2.789594000  | 0.614846000  |
| $2IM'_{A,B}$ : |              |              |              | 1  | -1.365125000 | 0.629537000  | -1.071167000 |
| 6              | 5.796344000  | 3.029097000  | 4.810546000  | 1  | -4.371533000 | 1.145581000  | -1.217097000 |
| 6              | 6.643513000  | 2.763461000  | 6.082534000  | 1  | -3.552947000 | -0.309799000 | -0.623189000 |
| 6              | 5.940691000  | 3.059315000  | 7.428949000  | 1  | -4.581961000 | 1.451345000  | 1.200265000  |
| 6              | 4.700335000  | 2.170691000  | 7.649143000  | 1  | -2.956895000 | 0.809411000  | 1.493494000  |
| 6              | 6.942627000  | 2.892532000  | 8.589148000  | 1  | -2.461315000 | 3.151609000  | 1.528540000  |
| 6              | 5.322422000  | 4.468317000  | 4.694477000  | 1  | -3.689087000 | 3.529776000  | 0.300291000  |
| 8              | 4.116313000  | 4.801707000  | 4.886836000  | 6  | -1.079074000 | 1.038037000  | -9.101828000 |
| 1              | 4.910435000  | 2.389933000  | 4.798465000  | 6  | -0.856662000 | 1.512896000  | -7.681687000 |
| 1              | 6.953699000  | 1.709046000  | 6.067360000  | 6  | -1.743634000 | 2.419392000  | -7.075243000 |
| 1              | 7.567671000  | 3.357306000  | 6.029627000  | 6  | -1.553356000 | 2.836768000  | -5.751302000 |
| 1              | 5.608418000  | 4.109299000  | 7.418192000  | 6  | -0.469420000 | 2.358415000  | -5.003186000 |
| 1              | 4.254903000  | 2.370572000  | 8.631010000  | 6  | 0.424984000  | 1.460642000  | -5.603199000 |
| 1              | 3.928303000  | 2.347742000  | 6.893158000  | 6  | 0.233315000  | 1.044282000  | -6.926503000 |
| 1              | 4.973066000  | 1.107321000  | 7.617934000  | 1  | -1.658730000 | 0.104836000  | -9.125857000 |
| 1              | 6.474866000  | 3.137070000  | 9.549731000  | 1  | -1.631512000 | 1.778976000  | -9.689837000 |
| 1              | 7.814650000  | 3.545660000  | 8.462283000  | 1  | -2.583882000 | 2.804480000  | -7.647833000 |
| 1              | 7.303023000  | 1.856927000  | 8.646986000  | 1  | -2.246633000 | 3.544175000  | -5.305036000 |
| 7              | 6.271684000  | 5.391296000  | 4.392039000  | 1  | -0.320581000 | 2.675541000  | -3.974839000 |
| 6              | 6.000776000  | 6.826238000  | 4.255156000  | 1  | 1.277086000  | 1.095084000  | -5.037691000 |
| 6              | 6.519156000  | 7.385690000  | 2.910264000  | 1  | 0.938188000  | 0.353861000  | -7.383384000 |
| 6              | 8.016197000  | 7.208348000  | 2.728900000  | 16 | -4.194597000 | -5.273198000 | -4.005824000 |
| 6              | 8.923727000  | 8.076604000  | 3.363622000  | 1  | -5.221400000 | -4.521379000 | -4.544931000 |
| 6              | 10.303487000 | 7.893611000  | 3.230541000  | 6  | -5.216086000 | -5.933956000 | -0.165321000 |
| 6              | 10.802082000 | 6.835566000  | 2.459593000  | 6  | -3.867565000 | -6.184417000 | -0.387565000 |
| 6              | 9.911770000  | 5.966137000  | 1.820635000  | 6  | -3.137215000 | -7.307754000 | -0.163723000 |
| 6              | 8.529822000  | 6.152180000  | 1.955003000  | 6  | -1.864261000 | -7.240173000 | -0.328173000 |
| 1              | 7.222035000  | 5.083969000  | 4.231017000  | 6  | -1.799565000 | -6.068340000 | -1.174881000 |
| 1              | 6.469677000  | 7.367127000  | 5.087676000  | 7  | -3.032323000 | -5.429596000 | -1.195475000 |
| 1              | 5.980641000  | 6.893285000  | 2.092299000  | 6  | -0.671542000 | -5.633991000 | -1.855900000 |
| 1              | 6.259406000  | 8.451328000  | 2.871399000  | 6  | -0.600066000 | -4.484928000 | -2.635103000 |
| 1              | 8.545659000  | 8.905799000  | 3.956215000  | 6  | 0.593738000  | -4.010816000 | -3.302776000 |
| 1              | 10.988477000 | 8.577743000  | 3.721543000  | 6  | 0.257257000  | -2.849876000 | -3.941175000 |
| 1              | 11.872906000 | 6.695998000  | 2.352779000  | 6  | -1.146553000 | -2.612045000 | -3.675022000 |
| 1              | 10.289214000 | 5.150193000  | 1.212296000  | 7  | -1.652297000 | -3.617878000 | -2.871760000 |
| 1              | 7.843406000  | 5.485355000  | 1.439751000  | 6  | -1.869895000 | -1.540137000 | -4.185651000 |
| 6              | 4.186834000  | -0.865866000 | -0.748562000 | 6  | -3.227527000 | -1.316308000 | -3.998611000 |
| 6              | 3.207320000  | 0.321414000  | -0.874984000 | 6  | -3.961813000 | -0.201989000 | -4.567637000 |
| 6              | 2.330605000  | 0.287381000  | -2.138831000 | 6  | -5.261581000 | -0.341690000 | -4.171184000 |
| 6              | 3.488184000  | -2.206491000 | -0.460870000 | 6  | -5.328861000 | -1.538014000 | -3.354568000 |
| 1              | 4.787686000  | -0.947289000 | -1.667994000 | 7  | -4.079374000 | -2.120794000 | -3.263443000 |
| 1              | 2.559524000  | 0.335082000  | 0.011867000  | 6  | -6.481974000 | -2.021192000 | -2.745657000 |
| 1              | 3.783139000  | 1.259680000  | -0.870373000 | 6  | -6.548954000 | -3.144777000 | -1.936373000 |
| 1              | 2.950211000  | 0.317589000  | -3.046721000 | 6  | -7.740814000 | -3.614451000 | -1.259175000 |
| 1              | 1.721544000  | -0.623650000 | -2.180833000 | 6  | -7.378566000 | -4.705618000 | -0.523412000 |
| 1              | 1.645953000  | 1.142928000  | -2.159256000 | 6  | -5.962624000 | -4.921232000 | -0.748560000 |
| 1              | 4.216535000  | -3.016578000 | -0.328122000 | 7  | -5.475229000 | -3.966210000 | -1.627016000 |
| 1              | 2.815393000  | -2.494763000 | -1.277284000 | 26 | -3.545254000 | -3.750350000 | -2.203220000 |
| 1              | 2.888741000  | -2.130369000 | 0.454715000  | 1  | -5.739057000 | -6.610168000 | 0.503495000  |
| 6              | -0.618773000 | 4.594244000  | 0.090796000  | 1  | 0.231470000  | -6.227828000 | -1.758426000 |
| 6              | 0.198461000  | 4.266338000  | 1.367636000  | 1  | -1.328343000 | -0.820855000 | -4.791636000 |
| 6              | 1.564447000  | 3.617862000  | 1.082430000  | 1  | -7.399596000 | -1.463129000 | -2.902116000 |
| 6              | 2.356288000  | 3.301669000  | 2.366152000  | 8  | -0.940387000 | -0.059820000 | 3.122199000  |
| 7              | 1.667407000  | 2.286143000  | 3.179479000  | 6  | -0.162498000 | -0.480896000 | 2.186044000  |
| 6              | 1.208384000  | 2.447122000  | 4.426558000  | 8  | 1.006717000  | -0.013031000 | 1.931886000  |
| 7              | 1.680834000  | 3.428266000  | 5.239575000  | 6  | -0.688539000 | -1.600745000 | 1.244627000  |
| 7              | 0.254788000  | 1.609695000  | 4.878830000  | 6  | -1.350704000 | -2.742249000 | 1.936732000  |
| 6              | -0.886199000 | 3.368316000  | -0.774663000 | 6  | -2.673999000 | -2.617460000 | 2.615854000  |
| 8              | -0.105798000 | 3.088288000  | -1.730845000 | 6  | -3.124152000 | -3.877637000 | 3.381241000  |
| 1              | -0.052056000 | 5.290573000  | -0.535224000 | 6  | -2.267688000 | -4.180729000 | 4.622619000  |
| 1              | -0.382872000 | 3.599852000  | 2.017585000  | 1  | -1.406245000 | -1.105239000 | 0.573287000  |
| 1              | 0.346591000  | 5.200861000  | 1.928847000  | 1  | 0.156012000  | -1.935140000 | 0.638687000  |
| 1              | 1.428921000  | 2.696811000  | 0.504814000  | 1  | -2.505791000 | -3.101248000 | -0.194395000 |
| 1              | 2.172127000  | 4.287197000  | 0.457835000  | 1  | -0.790204000 | -3.671229000 | 2.040485000  |
| 1              | 3.350646000  | 2.923422000  | 2.098085000  | 1  | -3.433709000 | -2.351889000 | 1.860530000  |
| 1              | 2.501681000  | 4.209413000  | 2.958231000  | 1  | -2.625713000 | -1.748180000 | 3.295160000  |
| 1              | 1.421489000  | 1.380992000  | 2.694217000  | 1  | -4.170785000 | -3.747642000 | 3.688141000  |
| 1              | 2.565159000  | 3.916864000  | 5.066968000  | 1  | -3.109027000 | -4.740211000 | 2.699083000  |
| 1              | 1.166876000  | 3.669582000  | 6.071268000  | 1  | -1.215445000 | -4.338717000 | 4.355903000  |
| 1              | -0.248585000 | 0.960339000  | 4.218378000  | 1  | -2.304299000 | -3.345792000 | 5.333686000  |
| 1              | 0.073893000  | 1.540603000  | 5.867771000  | 8  | -3.221290000 | -2.694209000 | -0.731296000 |
| 7              | -1.943558000 | 2.574888000  | -0.464064000 | 1  | -2.619269000 | -5.081681000 | 5.139795000  |
| 6              | -2.203779000 | 1.319463000  | -1.220032000 |    |              |              |              |

|   |              |              |              |
|---|--------------|--------------|--------------|
| 1 | -0.129448000 | 0.841898000  | -9.612020000 |
| 1 | 4.896548000  | -0.656564000 | 0.065896000  |
| 1 | -2.266330000 | 1.528050000  | -2.291510000 |
| 1 | -1.555882000 | 5.087230000  | 0.375856000  |
| 1 | 6.394032000  | 2.770787000  | 3.926180000  |
| 1 | 4.919032000  | 6.951316000  | 4.336274000  |
| 1 | -7.997810000 | -5.317959000 | 0.116057000  |
| 1 | -3.560423000 | -8.049362000 | 0.825713000  |
| 1 | -6.104669000 | 0.294216000  | -4.400020000 |
| 1 | -8.715052000 | -3.154498000 | -1.340534000 |
| 1 | -1.038733000 | -7.912697000 | -0.145300000 |
| 1 | 1.552153000  | -4.508579000 | -3.276894000 |
| 1 | -3.521373000 | 0.568856000  | -5.183359000 |
| 1 | 0.883308000  | -2.206746000 | -4.541739000 |
